# Supplementary material for: Metabolite Analysis and Histology on the Exact Same Tissue: Comprehensive Metabolomic Profiling and Metabolic Classification of Prostate Cancer
Source: PubMed Central journal article supplement (PMC5006072; doi:10.1038/srep32272), 2016-08-31
Supplement: srep32272-s1.pdf [file srep32272-s1.pdf]

## **Supplemental Information**

### **Metabolite Analysis and Histology on the Exact Same Tissue: Comprehensive Metabolomic Profiling and Metabolic Classification of Prostate Cancer**

Tao Huan<sup>1</sup>, Dean A. Troyer<sup>2\*</sup> and Liang Li<sup>1\*</sup>

<sup>1</sup>Department of Chemistry, University of Alberta, Edmonton, Alberta, Canada

<sup>2</sup>Departments of Pathology and Molecular Biology and Microbiology, Eastern Virginia Medical  
School, Virginia, US

## Supplemental Note N1. Experimental Section

### LC-UV quantification:

Briefly, 2  $\mu\text{L}$  of the labeled solution was injected onto a Waters ACQUITY BEH C18 column (2.1 mm  $\times$  5 cm, 1.7  $\mu\text{m}$  particle size, 130  $\text{\AA}$  pore size). Solvent A was 0.1% (v/v) formic acid in 10% (v/v) acetonitrile, and solvent B was 0.1% (v/v) formic acid in acetonitrile. The gradient started with 0% B for 1 min and was increased to 95% within 0.01 min and hold at 95% B for 1 min. The gradient was restored to 0% B in 0.5 min and hold at this condition for 3.5 min to re-equilibrate the column. The flow rate used was 0.45 mL/min.

### LC-MS method:

LC part: Reversed-phase Zorbax Eclipse C18 column (2.1 mm  $\times$  100 mm, 1.8  $\mu\text{m}$  particle size, 95  $\text{\AA}$  pore size) from Agilent was used. Solvent A was 0.1% (v/v) LC-MS grade formic acid in 5% (v/v) grade ACN, and solvent B was 0.1% (v/v) LC-MS grade formic acid in LC-MS grade ACN. The gradient elution profile was as follows:  $t=0.0$  min 20% B,  $t=3.5$  min, 35% B,  $t=18.0$  min, 65%B,  $t=24$  min, 99%B,  $t=28$  min, 99% B. The flow rate was 180  $\mu\text{L}/\text{min}$ .

### MS part: QTOF instrument parameters

1. MS instrument parameter: m/z scan range: 150 to 1000
2. Ion mode: positive ion
3. Source parameters

End plate offset: 500 V, Capillary: 4500 V, Nebulizer: 1.8 Bar, Dry gas: 8.0 L/min, Dry temperature: 230  $^{\circ}\text{C}$ .

4. Tune parameters

Funnel 1 RF 250.0 Vpp, Funnel 2 RF: 150.0 Vpp, Hexapole RF: 110.0 Vpp, Quadrupole ion energy: 3.0 eV, Low mass: 100.00, Collision RF 1500.0 Vpp, Transfer time: 80.0  $\mu$ s.

Pre pulse storage 10.0  $\mu$ s.

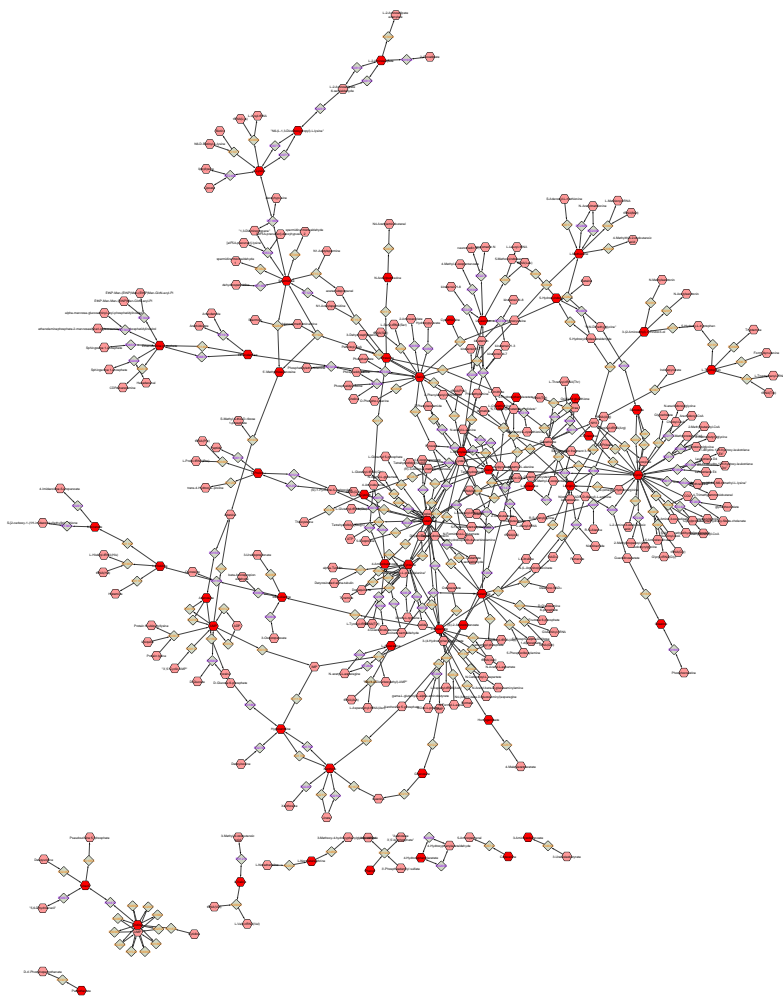

Supplemental Figure S1 (please zoom in to see the detail)

Supplemental Table T1. Metabolites positively identified using dansyl standards library with mass and retention time matches.

| #  | Input mass | Input rt | Calibrated RT | HMDB No.  | Name                           | Monoisotopic molecular mass | mz_light | Library RT | Mass error (Da) | RT error (min) | HMDB link            | KEGG link            | Show Detail            |
|----|------------|----------|---------------|-----------|--------------------------------|-----------------------------|----------|------------|-----------------|----------------|----------------------|----------------------|------------------------|
| 1  | 581.1207   | 2.05     | 1.70          | HMDB00045 | Adenosine monophosphate        | 347.0631                    | 581.1214 | 1.75       | 7.E-04          | 0.05           | <a href="#">Link</a> | <a href="#">Link</a> | <a href="#">Detail</a> |
| 2  | 517.1496   | 2.56     | 2.13          | HMDB00133 | Guanosine                      | 283.0917                    | 517.1500 | 2.22       | 4.E-04          | 0.09           | <a href="#">Link</a> | <a href="#">Link</a> | <a href="#">Detail</a> |
| 3  | 375.0774   | 2.58     | 2.15          | HMDB00224 | O-Phosphoethanolamine          | 141.0191                    | 375.0774 | 2.02       | 0.E+00          | 0.13           | <a href="#">Link</a> | <a href="#">Link</a> | <a href="#">Detail</a> |
| 4  | 403.1428   | 2.59     | 2.15          | HMDB00001 | 1-Methylhistidine              | 169.0851                    | 403.1434 | 2.17       | 6.E-04          | 0.02           | <a href="#">Link</a> | <a href="#">Link</a> | <a href="#">Detail</a> |
|    | 403.1428   | 2.59     | 2.15          | HMDB00479 | 3-Methylhistidine              | 169.0851                    | 403.1434 | 2.01       | 6.E-04          | 0.14           | <a href="#">Link</a> | <a href="#">Link</a> | <a href="#">Detail</a> |
| 5  | 510.1901   | 2.64     | 2.19          | HMDB00279 | Saccharopine                   | 276.1321                    | 510.1905 | 2.26       | 4.E-04          | 0.07           | <a href="#">Link</a> | <a href="#">Link</a> | <a href="#">Detail</a> |
| 6  | 408.1696   | 2.95     | 2.45          | HMDB00517 | L-Arginine                     | 174.1117                    | 408.1700 | 2.44       | 4.E-04          | 0.01           | <a href="#">Link</a> | <a href="#">Link</a> | <a href="#">Detail</a> |
| 7  | 366.1111   | 3.34     | 2.88          | HMDB00168 | L-Asparagine                   | 132.0535                    | 366.1118 | 3.00       | 7.E-04          | 0.12           | <a href="#">Link</a> | <a href="#">Link</a> | <a href="#">Detail</a> |
| 8  | 365.1280   | 3.38     | 2.93          | HMDB00064 | Creatine                       | 131.0695                    | 365.1278 | 3.02       | 2.E-04          | 0.09           | <a href="#">Link</a> | <a href="#">Link</a> | <a href="#">Detail</a> |
| 9  | 380.1279   | 3.67     | 3.25          | HMDB00641 | L-Glutamine                    | 146.0691                    | 380.1275 | 3.32       | 4.E-04          | 0.07           | <a href="#">Link</a> | <a href="#">Link</a> | <a href="#">Detail</a> |
| 10 | 359.1534   | 3.72     | 3.31          | HMDB01861 | 3-Methylhistamine              | 125.0953                    | 359.1536 | 3.27       | 2.E-04          | 0.04           | <a href="#">Link</a> | <a href="#">Link</a> | <a href="#">Detail</a> |
| 11 | 510.1540   | 3.80     | 3.40          | HMDB11737 | Gamma Glutamylglutamic acid    | 276.0958                    | 510.1541 | 3.44       | 1.E-04          | 0.04           | <a href="#">Link</a> | <a href="#">Link</a> | <a href="#">Detail</a> |
| 12 | 399.1039   | 4.04     | 3.66          | HMDB02005 | Methionine Sulfoxide           | 165.0460                    | 399.1043 | 3.72       | 4.E-04          | 0.06           | <a href="#">Link</a> | <a href="#">Link</a> | <a href="#">Detail</a> |
| 13 | 501.1545   | 4.26     | 3.90          | HMDB00050 | Adenosine                      | 267.0968                    | 501.1551 | 3.94       | 6.E-04          | 0.04           | <a href="#">Link</a> | <a href="#">Link</a> | <a href="#">Detail</a> |
| 14 | 353.1168   | 4.45     | 4.11          | HMDB00719 | L-Homoserine                   | 119.0582                    | 353.1166 | 4.05       | 2.E-04          | 0.06           | <a href="#">Link</a> | <a href="#">Link</a> | <a href="#">Detail</a> |
| 15 | 399.1037   | 4.49     | 4.16          | HMDB02005 | Methionine Sulfoxide - Isomer  | 165.0460                    | 399.1043 | 4.20       | 6.E-04          | 0.04           | <a href="#">Link</a> | <a href="#">Link</a> | <a href="#">Detail</a> |
| 16 | 339.1017   | 4.75     | 4.44          | HMDB00187 | L-Serine                       | 105.0426                    | 339.1009 | 4.40       | 8.E-04          | 0.04           | <a href="#">Link</a> | <a href="#">Link</a> | <a href="#">Detail</a> |
| 17 | 381.1115   | 5.30     | 5.06          | HMDB00148 | L-Glutamic Acid                | 147.0532                    | 381.1115 | 5.05       | 0.E+00          | 0.01           | <a href="#">Link</a> | <a href="#">Link</a> | <a href="#">Detail</a> |
| 18 | 367.0958   | 5.39     | 5.16          | HMDB00191 | L-Aspartic Acid                | 133.0375                    | 367.0958 | 5.16       | 0.E+00          | 0.00           | <a href="#">Link</a> | <a href="#">Link</a> | <a href="#">Detail</a> |
| 19 | 492.1805   | 5.75     | 5.57          | HMDB00279 | Saccharopine - H2O             | 276.1321                    | 492.1799 | 5.65       | 6.E-04          | 0.08           | <a href="#">Link</a> | <a href="#">Link</a> | <a href="#">Detail</a> |
| 20 | 353.1171   | 5.95     | 5.80          | HMDB00167 | L-Threonine                    | 119.0582                    | 353.1166 | 5.79       | 5.E-04          | 0.01           | <a href="#">Link</a> | <a href="#">Link</a> | <a href="#">Detail</a> |
| 21 | 395.1267   | 6.09     | 5.94          | HMDB00510 | Amino adipic acid              | 161.0688                    | 395.1271 | 5.97       | 4.E-04          | 0.03           | <a href="#">Link</a> | <a href="#">Link</a> | <a href="#">Detail</a> |
| 22 | 295.1114   | 6.22     | 6.07          | HMDB00149 | Ethanolamine                   | 61.0528                     | 295.1111 | 6.00       | 3.E-04          | 0.07           | <a href="#">Link</a> | <a href="#">Link</a> | <a href="#">Detail</a> |
| 23 | 309.0906   | 6.72     | 6.57          | HMDB00123 | Glycine                        | 75.0320                     | 309.0903 | 6.59       | 3.E-04          | 0.02           | <a href="#">Link</a> | <a href="#">Link</a> | <a href="#">Detail</a> |
| 24 | 531.1468   | 7.20     | 7.06          | HMDB01173 | 5'-Methylthioadenosine         | 297.0896                    | 531.1479 | 6.97       | 1.E-03          | 0.09           | <a href="#">Link</a> | <a href="#">Link</a> | <a href="#">Detail</a> |
| 25 | 364.1690   | 7.24     | 7.11          | HMDB02064 | N-Acetylputrescine             | 130.1106                    | 364.1689 | 7.25       | 1.E-04          | 0.14           | <a href="#">Link</a> | <a href="#">Link</a> | <a href="#">Detail</a> |
| 26 | 406.1423   | 7.33     | 7.19          | HMDB00721 | Glycylproline                  | 172.0848                    | 406.1431 | 7.17       | 8.E-04          | 0.02           | <a href="#">Link</a> | <a href="#">Link</a> | <a href="#">Detail</a> |
| 27 | 323.1065   | 7.40     | 7.27          | HMDB00056 | Beta-Alanine                   | 89.0477                     | 323.1060 | 7.24       | 5.E-04          | 0.03           | <a href="#">Link</a> | <a href="#">Link</a> | <a href="#">Detail</a> |
| 28 | 323.1062   | 7.72     | 7.59          | HMDB00161 | L-Alanine                      | 89.0477                     | 323.1060 | 7.57       | 2.E-04          | 0.02           | <a href="#">Link</a> | <a href="#">Link</a> | <a href="#">Detail</a> |
| 29 | 337.1223   | 7.94     | 7.80          | HMDB00112 | Gamma-Aminobutyric acid        | 103.0633                    | 337.1216 | 7.79       | 7.E-04          | 0.01           | <a href="#">Link</a> | <a href="#">Link</a> | <a href="#">Detail</a> |
| 30 | 478.1280   | 8.04     | 7.90          | HMDB00296 | Uridine                        | 244.0695                    | 478.1279 | 7.84       | 1.E-04          | 0.06           | <a href="#">Link</a> | <a href="#">Link</a> | <a href="#">Detail</a> |
| 31 | 540.1347   | 8.28     | 8.12          | HMDB03337 | Oxidized glutathione           | 612.1520                    | 540.1343 | 8.07       | 4.E-04          | 0.05           | <a href="#">Link</a> | <a href="#">Link</a> | <a href="#">Detail</a> |
| 32 | 453.1686   | 8.48     | 8.32          | HMDB00210 | Pantothenic acid               | 219.1107                    | 453.1690 | 8.37       | 4.E-04          | 0.05           | <a href="#">Link</a> | <a href="#">Link</a> | <a href="#">Detail</a> |
| 33 | 337.1220   | 8.85     | 8.67          | HMDB03911 | 3-Aminoisobutanoic acid        | 103.0633                    | 337.1216 | 8.67       | 4.E-04          | 0.00           | <a href="#">Link</a> | <a href="#">Link</a> | <a href="#">Detail</a> |
| 34 | 370.0970   | 8.95     | 8.76          | HMDB00157 | Hypoxanthine - multi-tags      | 136.0385                    | 370.0968 | 8.73       | 2.E-04          | 0.03           | <a href="#">Link</a> | <a href="#">Link</a> | <a href="#">Detail</a> |
| 35 | 460.1174   | 8.97     | 8.78          | HMDB00296 | Uridine - H2O                  | 244.0695                    | 460.1173 | 8.67       | 1.E-04          | 0.11           | <a href="#">Link</a> | <a href="#">Link</a> | <a href="#">Detail</a> |
| 36 | 386.0914   | 9.24     | 9.04          | HMDB00292 | Xanthine                       | 152.0334                    | 386.0917 | 8.95       | 3.E-04          | 0.09           | <a href="#">Link</a> | <a href="#">Link</a> | <a href="#">Detail</a> |
| 37 | 408.1585   | 9.29     | 9.08          | HMDB28854 | Glycyl-Valine                  | 174.1004                    | 408.1588 | 9.19       | 3.E-04          | 0.11           | <a href="#">Link</a> | <a href="#">Link</a> | <a href="#">Detail</a> |
| 38 | 337.1226   | 9.38     | 9.17          | HMDB00452 | L-Alpha-aminobutyric acid      | 103.0633                    | 337.1216 | 9.13       | 1.E-03          | 0.04           | <a href="#">Link</a> | <a href="#">Link</a> | <a href="#">Detail</a> |
| 39 | 363.1012   | 9.53     | 9.32          | HMDB00148 | L-Glutamic Acid - H2O          | 147.0532                    | 363.1009 | 9.46       | 3.E-04          | 0.14           | <a href="#">Link</a> | <a href="#">Link</a> | <a href="#">Detail</a> |
| 40 | 337.1218   | 9.58     | 9.36          | HMDB00650 | Alpha-aminobutyric acid        | 103.0633                    | 337.1216 | 9.23       | 2.E-04          | 0.13           | <a href="#">Link</a> | <a href="#">Link</a> | <a href="#">Detail</a> |
| 41 | 323.1059   | 9.59     | 9.37          | HMDB00271 | Sarcosine                      | 89.0477                     | 323.1060 | 9.34       | 1.E-04          | 0.03           | <a href="#">Link</a> | <a href="#">Link</a> | <a href="#">Detail</a> |
| 42 | 363.1013   | 9.70     | 9.48          | HMDB00148 | L-Glutamic Acid - H2O          | 147.0532                    | 363.1009 | 9.46       | 4.E-04          | 0.02           | <a href="#">Link</a> | <a href="#">Link</a> | <a href="#">Detail</a> |
| 43 | 370.0968   | 9.85     | 9.62          | HMDB00157 | Hypoxanthine - Isomer          | 136.0385                    | 370.0968 | 9.65       | 0.E+00          | 0.03           | <a href="#">Link</a> | <a href="#">Link</a> | <a href="#">Detail</a> |
| 44 | 370.0976   | 10.00    | 9.76          | HMDB00157 | Hypoxanthine - Isomer          | 136.0385                    | 370.0968 | 9.65       | 8.E-04          | 0.11           | <a href="#">Link</a> | <a href="#">Link</a> | <a href="#">Detail</a> |
| 45 | 379.2159   | 10.20    | 10.01         | HMDB01257 | Spermidine                     | 145.1579                    | 379.2159 | 10.8       | 0.E+00          | 0.11           | <a href="#">Link</a> | <a href="#">Link</a> | <a href="#">Detail</a> |
| 46 | 514.1656   | 10.31    | 10.06         | HMDB00706 | L-Aspartyl-L-phenylalanine     | 280.1059                    | 514.1642 | 10.07      | 1.E-03          | 0.01           | <a href="#">Link</a> | <a href="#">Link</a> | <a href="#">Detail</a> |
| 47 | 349.1229   | 10.47    | 10.21         | HMDB00162 | L-Proline                      | 115.0633                    | 349.1216 | 10.18      | 1.E-03          | 0.03           | <a href="#">Link</a> | <a href="#">Link</a> | <a href="#">Detail</a> |
| 48 | 466.2002   | 10.58    | 10.32         | HMDB29065 | Threoninyl-Leucine             | 232.1423                    | 466.2006 | 10.18      | 4.E-04          | 0.14           | <a href="#">Link</a> | <a href="#">Link</a> | <a href="#">Detail</a> |
| 49 | 351.1382   | 11.13    | 10.85         | HMDB00883 | L-Valine                       | 117.0790                    | 351.1373 | 10.81      | 9.E-04          | 0.04           | <a href="#">Link</a> | <a href="#">Link</a> | <a href="#">Detail</a> |
| 50 | 383.1098   | 11.21    | 10.92         | HMDB00696 | L-Methionine                   | 149.0510                    | 383.1094 | 10.89      | 4.E-04          | 0.03           | <a href="#">Link</a> | <a href="#">Link</a> | <a href="#">Detail</a> |
| 51 | 422.1743   | 11.48    | 11.19         | HMDB00759 | Glycyl-L-Leucine               | 188.1161                    | 422.1744 | 11.22      | 1.E-04          | 0.03           | <a href="#">Link</a> | <a href="#">Link</a> | <a href="#">Detail</a> |
| 52 | 346.0868   | 11.70    | 11.40         | HMDB00300 | Uracil                         | 112.0273                    | 346.0856 | 11.34      | 1.E-03          | 0.06           | <a href="#">Link</a> | <a href="#">Link</a> | <a href="#">Detail</a> |
| 53 | 436.1900   | 11.76    | 11.46         | HMDB28691 | Alanyl-Leucine                 | 202.1317                    | 436.1901 | 11.36      | 1.E-04          | 0.10           | <a href="#">Link</a> | <a href="#">Link</a> | <a href="#">Detail</a> |
| 54 | 438.1477   | 11.80    | 11.50         | HMDB00929 | L-Tryptophan                   | 204.0899                    | 438.1482 | 11.44      | 5.E-04          | 0.06           | <a href="#">Link</a> | <a href="#">Link</a> | <a href="#">Detail</a> |
| 55 | 470.1737   | 12.54    | 12.22         | HMDB28694 | Alanyl-Phenylalanine           | 236.1161                    | 470.1744 | 12.11      | 7.E-04          | 0.11           | <a href="#">Link</a> | <a href="#">Link</a> | <a href="#">Detail</a> |
| 56 | 399.1372   | 13.09    | 12.77         | HMDB00159 | L-Phenylalanine                | 165.0790                    | 399.1373 | 12.74      | 1.E-04          | 0.03           | <a href="#">Link</a> | <a href="#">Link</a> | <a href="#">Detail</a> |
| 57 | 365.1532   | 13.39    | 13.05         | HMDB00172 | L-Isoleucine                   | 131.0946                    | 365.1529 | 13.06      | 3.E-04          | 0.01           | <a href="#">Link</a> | <a href="#">Link</a> | <a href="#">Detail</a> |
| 58 | 365.1529   | 13.72    | 13.35         | HMDB00687 | L-leucine                      | 131.0946                    | 365.1529 | 13.36      | 0.E+00          | 0.01           | <a href="#">Link</a> | <a href="#">Link</a> | <a href="#">Detail</a> |
| 59 | 372.1012   | 13.95    | 13.57         | HMDB00301 | Urocanic acid                  | 138.0429                    | 372.1012 | 13.52      | 0.E+00          | 0.05           | <a href="#">Link</a> | <a href="#">Link</a> | <a href="#">Detail</a> |
| 60 | 364.6245   | 14.04    | 13.65         | HMDB04987 | Alpha-Aspartyl-lysine          | 261.1325                    | 364.6246 | 13.61      | 1.E-04          | 0.04           | <a href="#">Link</a> | <a href="#">Link</a> | <a href="#">Detail</a> |
| 61 | 345.0922   | 14.12    | 13.72         | HMDB00099 | L-Cystathionine - Isomer       | 222.0674                    | 345.0920 | 13.69      | 2.E-04          | 0.03           | <a href="#">Link</a> | <a href="#">Link</a> | <a href="#">Detail</a> |
|    | 345.0922   | 14.12    | 13.72         | HMDB00455 | Alloctathionine - Isomer       | 222.0674                    | 345.0920 | 13.61      | 2.E-04          | 0.11           | <a href="#">Link</a> | <a href="#">Link</a> | <a href="#">Detail</a> |
| 62 | 364.6239   | 14.12    | 13.72         | HMDB04987 | Alpha-Aspartyl-lysine          | 261.1325                    | 364.6246 | 13.61      | 7.E-04          | 0.11           | <a href="#">Link</a> | <a href="#">Link</a> | <a href="#">Detail</a> |
| 63 | 315.1088   | 14.27    | 13.87         | HMDB00450 | 5-Hydroxylysine                | 162.1004                    | 315.1085 | 13.88      | 3.E-04          | 0.01           | <a href="#">Link</a> | <a href="#">Link</a> | <a href="#">Detail</a> |
| 64 | 354.0706   | 14.54    | 14.11         | HMDB00192 | L-Cystine                      | 240.2038                    | 354.0702 | 14.11      | 4.E-04          | 0.00           | <a href="#">Link</a> | <a href="#">Link</a> | <a href="#">Detail</a> |
| 65 | 425.1161   | 15.44    | 15.00         | HMDB00763 | 5-Hydroxyindoleacetic acid     | 191.0582                    | 425.1166 | 15.09      | 5.E-04          | 0.09           | <a href="#">Link</a> | <a href="#">Link</a> | <a href="#">Detail</a> |
| 66 | 414.1222   | 15.76    | 15.32         | HMDB01889 | Theophylline                   | 180.0647                    | 414.1230 | 15.42      | 8.E-04          | 0.10           | <a href="#">Link</a> | <a href="#">Link</a> | <a href="#">Detail</a> |
| 67 | 319.1110   | 16.62    | 16.17         | HMDB03911 | 3-Aminoisobutanoic acid - H2O  | 103.0633                    | 319.1110 | 16.29      | 0.E+00          | 0.12           | <a href="#">Link</a> | <a href="#">Link</a> | <a href="#">Detail</a> |
| 68 | 385.1226   | 16.66    | 16.21         | HMDB01859 | Acetaminophen                  | 151.0633                    | 385.1216 | 16.35      | 1.E-03          | 0.14           | <a href="#">Link</a> | <a href="#">Link</a> | <a href="#">Detail</a> |
| 69 | 386.1052   | 17.02    | 16.55         | HMDB00440 | 3-Hydroxyphenylacetic acid     | 152.0473                    | 386.1057 | 16.72      | 5.E-04          | 0.17           | <a href="#">Link</a> | <a href="#">Link</a> | <a href="#">Detail</a> |
|    | 386.1052   | 17.02    | 16.55         | HMDB00669 | Ortho-Hydroxyphenylacetic acid | 152.0473                    | 386.1057 | 16.42      | 5.E-04          | 0.13           | <a href="#">Link</a> | <a href="#">Link</a> | <a href="#">Detail</a> |
| 70 | 386.1049   | 17.37    | 16.90         | HMDB00020 | p-Hydroxyphenylacetic acid     | 152.0473                    | 386.1057 | 16.91      | 8.E-04          | 0.01           | <a href="#">Link</a> | <a href="#">Link</a> | <a href="#">Detail</a> |
|    | 386.1049   | 17.37    | 16.90         | HMDB02390 | 3-Cresotinic acid              | 152.0473                    | 386.1057 | 16.80      | 8.E-04          | 0.10           | <a href="#">Link</a> | <a href="#">Link</a> | <a href="#">Detail</a> |

|    |          |       |       |           |                          |          |          |       |        |      |                      |                      |                        |
|----|----------|-------|-------|-----------|--------------------------|----------|----------|-------|--------|------|----------------------|----------------------|------------------------|
| 71 | 402.1010 | 17.85 | 17.38 | HMDB00484 | Vanillic acid            | 168.0423 | 402.1006 | 17.34 | 4.E-04 | 0.04 | <a href="#">Link</a> | <a href="#">Link</a> | <a href="#">Detail</a> |
| 72 | 307.1113 | 17.94 | 17.47 | HMDB00182 | L-Lysine                 | 146.1055 | 307.1111 | 17.47 | 2.E-04 | 0.00 | <a href="#">Link</a> | <a href="#">Link</a> | <a href="#">Detail</a> |
| 73 | 372.0894 | 18.11 | 17.64 | HMDB00500 | 4-Hydroxybenzoic acid    | 138.0317 | 372.0900 | 17.57 | 6.E-04 | 0.07 | <a href="#">Link</a> | <a href="#">Link</a> | <a href="#">Detail</a> |
| 74 | 389.1281 | 18.60 | 18.13 | HMDB00177 | L-Histidine              | 155.0695 | 389.1278 | 18.09 | 3.E-04 | 0.04 | <a href="#">Link</a> | <a href="#">Link</a> | <a href="#">Detail</a> |
| 75 | 393.1830 | 19.52 | 19.06 | HMDB00991 | 2-aminooctanoic acid     | 159.1259 | 393.1842 | 19.20 | 1.E-03 | 0.14 | <a href="#">Link</a> | <a href="#">Link</a> | <a href="#">Detail</a> |
| 76 | 395.1048 | 19.75 | 19.29 | HMDB03320 | Indole-3-carboxylic acid | 161.0477 | 395.1060 | 19.27 | 1.E-03 | 0.02 | <a href="#">Link</a> | <a href="#">Link</a> | <a href="#">Detail</a> |
| 77 | 353.1060 | 20.58 | 20.13 | HMDB29105 | Tyrosyl-Glycine          | 238.0954 | 353.1060 | 20.19 | 0.E+00 | 0.06 | <a href="#">Link</a> | <a href="#">Link</a> | <a href="#">Detail</a> |
| 78 | 278.1077 | 21.60 | 21.15 | HMDB01414 | 1_4-diaminobutane        | 88.1000  | 278.1083 | 21.27 | 6.E-04 | 0.12 | <a href="#">Link</a> | <a href="#">Link</a> | <a href="#">Detail</a> |
| 79 | 360.1140 | 22.31 | 21.87 | HMDB28699 | Alanyl-Tyrosine          | 252.1110 | 360.1138 | 21.85 | 2.E-04 | 0.02 | <a href="#">Link</a> | <a href="#">Link</a> | <a href="#">Detail</a> |
| 80 | 501.2412 | 22.50 | 22.06 | HMDB01932 | Metoprolol               | 267.1834 | 501.2418 | 22.09 | 6.E-04 | 0.03 | <a href="#">Link</a> | <a href="#">Link</a> | <a href="#">Detail</a> |
| 81 | 285.1155 | 22.77 | 22.33 | HMDB02322 | Cadaverine               | 102.1157 | 285.1162 | 22.39 | 7.E-04 | 0.06 | <a href="#">Link</a> | <a href="#">Link</a> | <a href="#">Detail</a> |
| 82 | 324.5957 | 23.10 | 22.66 | HMDB00158 | L-Tyrosine               | 181.0739 | 324.5953 | 22.65 | 4.E-04 | 0.01 | <a href="#">Link</a> | <a href="#">Link</a> | <a href="#">Detail</a> |
| 83 | 328.1003 | 23.56 | 23.12 | HMDB00228 | Phenol                   | 94.0419  | 328.1002 | 23.16 | 1.E-04 | 0.04 | <a href="#">Link</a> | <a href="#">Link</a> | <a href="#">Detail</a> |
| 84 | 325.6028 | 23.80 | 23.36 | HMDB00819 | Normetanephrine          | 183.0895 | 325.6031 | 23.41 | 3.E-04 | 0.05 | <a href="#">Link</a> | <a href="#">Link</a> | <a href="#">Detail</a> |
| 85 | 342.1156 | 24.88 | 24.44 | HMDB02048 | m-Cresol                 | 108.0575 | 342.1158 | 24.44 | 2.E-04 | 0.00 | <a href="#">Link</a> | <a href="#">Link</a> | <a href="#">Detail</a> |
| 86 | 322.1052 | 25.12 | 24.68 | HMDB00259 | Serotonin                | 176.0950 | 322.1058 | 24.65 | 6.E-04 | 0.03 | <a href="#">Link</a> | <a href="#">Link</a> | <a href="#">Detail</a> |
| 87 | 318.0793 | 25.39 | 24.95 | HMDB00130 | Homogentisic acid        | 168.0423 | 318.0794 | 24.84 | 1.E-04 | 0.11 | <a href="#">Link</a> | <a href="#">Link</a> | <a href="#">Detail</a> |
| 88 | 356.1308 | 25.98 | 25.54 | HMDB29306 | 4-Ethylphenol            | 122.0732 | 356.1315 | 25.63 | 7.E-04 | 0.09 | <a href="#">Link</a> | <a href="#">Link</a> | <a href="#">Detail</a> |

Supplemental Table T2. Metabolites putatively identified using accurate mass match against the HMDB library.

| feature ID | rt (min) | mz_light | mz_heavy | Monoisotopic   |          | int_heavy | nCharge | nTag | Matches            |
|------------|----------|----------|----------|----------------|----------|-----------|---------|------|--------------------|
|            |          |          |          | molecular mass | distance |           |         |      |                    |
| 18         | 1.96     | 449.1137 | 451.1198 | 215.0554       | 2.0061   | 3.1E+05   | 1       | 1    | <a href="#">1</a>  |
| 26         | 2.03     | 722.1662 | 724.1704 | 488.1079       | 2.0042   | 6.9E+03   | 1       | 1    | <a href="#">1</a>  |
| 28         | 2.05     | 581.1207 | 583.1276 | 347.0623       | 2.0070   | 1.9E+04   | 1       | 1    | <a href="#">4</a>  |
| 37         | 2.12     | 403.0623 | 405.0680 | 169.0040       | 2.0056   | 1.4E+04   | 1       | 1    | <a href="#">1</a>  |
| 44         | 2.14     | 375.0775 | 377.0843 | 141.0192       | 2.0067   | 5.1E+05   | 1       | 1    | <a href="#">1</a>  |
| 46         | 2.16     | 389.1273 | 391.1339 | 155.0690       | 2.0066   | 2.2E+04   | 1       | 1    | <a href="#">1</a>  |
| 69         | 2.39     | 541.1417 | 543.1481 | 307.0834       | 2.0064   | 8.7E+03   | 1       | 1    | <a href="#">1</a>  |
| 78         | 2.49     | 359.0735 | 361.0798 | 125.0151       | 2.0063   | 2.3E+06   | 1       | 1    | <a href="#">1</a>  |
| 84         | 2.52     | 366.1002 | 368.1070 | 132.0419       | 2.0068   | 1.6E+04   | 1       | 1    | <a href="#">7</a>  |
| 88         | 2.56     | 517.1496 | 519.1562 | 283.0913       | 2.0066   | 1.0E+05   | 1       | 1    | <a href="#">2</a>  |
| 94         | 2.59     | 403.1428 | 405.1489 | 169.0845       | 2.0061   | 1.6E+04   | 1       | 1    | <a href="#">2</a>  |
| 98         | 2.60     | 414.1209 | 416.1276 | 180.0626       | 2.0067   | 7.8E+04   | 1       | 1    | <a href="#">14</a> |
| 103        | 2.63     | 501.1533 | 503.1582 | 267.0950       | 2.0049   | 1.0E+04   | 1       | 1    | <a href="#">1</a>  |
| 104        | 2.64     | 510.1901 | 512.1963 | 276.1317       | 2.0062   | 1.3E+04   | 1       | 1    | <a href="#">1</a>  |
| 119        | 2.84     | 456.2213 | 458.2284 | 444.3259       | 2.0072   | 6.5E+03   | 2       | 2    | <a href="#">1</a>  |
| 123        | 2.85     | 509.1700 | 511.1755 | 275.1117       | 2.0055   | 1.7E+04   | 1       | 1    | <a href="#">2</a>  |
| 128        | 2.92     | 414.1213 | 416.1280 | 180.0630       | 2.0067   | 2.8E+05   | 1       | 1    | <a href="#">14</a> |
| 129        | 2.92     | 424.1174 | 426.1237 | 190.0591       | 2.0064   | 1.0E+04   | 1       | 1    | <a href="#">1</a>  |
| 133        | 2.94     | 375.0771 | 377.0838 | 141.0188       | 2.0067   | 1.1E+04   | 1       | 1    | <a href="#">1</a>  |
| 135        | 2.95     | 408.1696 | 410.1761 | 174.1113       | 2.0065   | 1.1E+05   | 1       | 1    | <a href="#">2</a>  |
| 151        | 3.06     | 424.1167 | 426.1235 | 190.0584       | 2.0068   | 1.9E+04   | 1       | 1    | <a href="#">1</a>  |
| 156        | 3.14     | 518.1337 | 520.1397 | 284.0753       | 2.0061   | 1.5E+04   | 1       | 1    | <a href="#">1</a>  |
| 157        | 3.16     | 496.1383 | 498.1444 | 262.0800       | 2.0061   | 6.7E+03   | 1       | 1    | <a href="#">1</a>  |
| 161        | 3.19     | 366.1007 | 368.1073 | 132.0424       | 2.0066   | 1.6E+05   | 1       | 1    | <a href="#">7</a>  |
| 163        | 3.21     | 502.1391 | 504.1459 | 268.0807       | 2.0068   | 3.6E+05   | 1       | 1    | <a href="#">4</a>  |
| 164        | 3.22     | 422.2100 | 424.2171 | 188.1517       | 2.0071   | 9.3E+03   | 1       | 1    | <a href="#">1</a>  |
| 165        | 3.24     | 345.1383 | 347.1445 | 111.0800       | 2.0062   | 5.4E+04   | 1       | 1    | <a href="#">1</a>  |
| 171        | 3.28     | 417.0777 | 419.0828 | 183.0194       | 2.0050   | 1.4E+04   | 1       | 1    | <a href="#">1</a>  |
| 173        | 3.29     | 581.1214 | 583.1278 | 347.0630       | 2.0064   | 1.1E+04   | 1       | 1    | <a href="#">4</a>  |
| 176        | 3.36     | 515.1720 | 517.1761 | 281.1137       | 2.0041   | 9.4E+03   | 1       | 1    | <a href="#">4</a>  |
| 177        | 3.36     | 468.1429 | 470.1499 | 234.0846       | 2.0070   | 7.5E+03   | 1       | 1    | <a href="#">1</a>  |
| 182        | 3.38     | 365.1280 | 367.1341 | 131.0697       | 2.0061   | 1.6E+05   | 1       | 1    | <a href="#">1</a>  |
| 187        | 3.41     | 375.0767 | 377.0834 | 141.0184       | 2.0067   | 9.1E+03   | 1       | 1    | <a href="#">1</a>  |
| 192        | 3.41     | 424.1533 | 426.1590 | 190.0950       | 2.0057   | 1.1E+04   | 1       | 1    | <a href="#">1</a>  |
| 207        | 3.52     | 359.0731 | 361.0788 | 125.0148       | 2.0057   | 9.6E+03   | 1       | 1    | <a href="#">1</a>  |
| 237        | 3.67     | 380.1279 | 382.1343 | 146.0696       | 2.0065   | 2.5E+06   | 1       | 1    | <a href="#">4</a>  |
| 245        | 3.72     | 359.1534 | 361.1594 | 125.0951       | 2.0059   | 1.1E+04   | 1       | 1    | <a href="#">2</a>  |
| 246        | 3.72     | 436.2006 | 438.2069 | 202.1423       | 2.0063   | 9.8E+03   | 1       | 1    | <a href="#">2</a>  |
| 255        | 3.80     | 510.1540 | 512.1602 | 276.0957       | 2.0061   | 1.1E+04   | 1       | 1    | <a href="#">1</a>  |
| 264        | 3.88     | 438.1326 | 440.1391 | 204.0743       | 2.0064   | 8.3E+03   | 1       | 1    | <a href="#">2</a>  |
| 266        | 3.90     | 518.3183 | 520.3321 | 568.5199       | 2.0139   | 8.9E+03   | 2       | 2    | <a href="#">1</a>  |
| 267        | 3.91     | 409.1532 | 411.1595 | 175.0949       | 2.0064   | 2.1E+04   | 1       | 1    | <a href="#">2</a>  |
| 282        | 4.04     | 399.1039 | 401.1098 | 165.0456       | 2.0060   | 1.0E+04   | 1       | 1    | <a href="#">1</a>  |

|      |      |          |          |           |        |         |   |   |                    |
|------|------|----------|----------|-----------|--------|---------|---|---|--------------------|
| 304  | 4.26 | 501.1545 | 503.1612 | 267.0961  | 2.0067 | 8.7E+04 | 1 | 1 | <a href="#">3</a>  |
| 327  | 4.36 | 366.1007 | 368.1069 | 132.0424  | 2.0062 | 2.8E+04 | 1 | 1 | <a href="#">7</a>  |
| 328  | 4.36 | 414.1209 | 416.1268 | 180.0626  | 2.0058 | 1.1E+04 | 1 | 1 | <a href="#">14</a> |
| 337  | 4.37 | 501.1547 | 503.1615 | 267.0964  | 2.0067 | 2.8E+05 | 1 | 1 | <a href="#">3</a>  |
| 350  | 4.44 | 380.1269 | 382.1338 | 146.0685  | 2.0069 | 1.2E+04 | 1 | 1 | <a href="#">4</a>  |
| 353  | 4.45 | 353.1168 | 355.1229 | 119.0585  | 2.0061 | 2.2E+04 | 1 | 1 | <a href="#">3</a>  |
| 365  | 4.49 | 399.1037 | 401.1102 | 165.0454  | 2.0065 | 1.3E+04 | 1 | 1 | <a href="#">1</a>  |
| 366  | 4.50 | 451.1636 | 453.1701 | 217.1053  | 2.0065 | 7.8E+03 | 1 | 1 | <a href="#">1</a>  |
| 404  | 4.78 | 380.1274 | 382.1334 | 146.0691  | 2.0060 | 6.0E+03 | 1 | 1 | <a href="#">4</a>  |
| 410  | 4.81 | 381.1113 | 383.1176 | 147.0529  | 2.0063 | 1.9E+04 | 1 | 1 | <a href="#">6</a>  |
| 415  | 4.83 | 478.1268 | 480.1336 | 244.0685  | 2.0068 | 1.2E+04 | 1 | 1 | <a href="#">2</a>  |
| 459  | 5.06 | 523.1852 | 525.1916 | 289.1269  | 2.0064 | 2.3E+04 | 1 | 1 | <a href="#">1</a>  |
| 494  | 5.30 | 381.1115 | 383.1180 | 147.0532  | 2.0065 | 5.6E+06 | 1 | 1 | <a href="#">6</a>  |
| 503  | 5.39 | 367.0958 | 369.1023 | 133.0375  | 2.0065 | 7.2E+05 | 1 | 1 | <a href="#">3</a>  |
| 505  | 5.39 | 414.1212 | 416.1270 | 180.0629  | 2.0058 | 1.3E+04 | 1 | 1 | <a href="#">14</a> |
| 637  | 5.85 | 734.4366 | 736.4414 | 1000.7565 | 2.0048 | 4.3E+05 | 2 | 2 | <a href="#">2</a>  |
| 666  | 5.93 | 379.1329 | 381.1382 | 145.0745  | 2.0053 | 1.6E+04 | 1 | 1 | <a href="#">6</a>  |
| 671  | 5.95 | 353.1171 | 355.1235 | 119.0588  | 2.0064 | 5.8E+05 | 1 | 1 | <a href="#">3</a>  |
| 698  | 6.09 | 395.1267 | 397.1332 | 161.0684  | 2.0065 | 7.5E+04 | 1 | 1 | <a href="#">1</a>  |
| 729  | 6.23 | 852.4616 | 854.4656 | 1236.8065 | 2.0040 | 2.8E+04 | 2 | 2 | <a href="#">2</a>  |
| 755  | 6.31 | 582.3519 | 584.3532 | 696.5871  | 2.0013 | 2.8E+04 | 2 | 2 | <a href="#">1</a>  |
| 768  | 6.33 | 601.3319 | 603.3330 | 367.2736  | 2.0012 | 3.2E+04 | 1 | 1 | <a href="#">1</a>  |
| 891  | 6.48 | 348.1015 | 350.1074 | 114.0431  | 2.0059 | 2.4E+04 | 1 | 1 | <a href="#">2</a>  |
| 952  | 6.53 | 645.3575 | 647.3591 | 411.2992  | 2.0016 | 2.9E+04 | 1 | 1 | <a href="#">1</a>  |
| 962  | 6.54 | 389.1277 | 391.1333 | 155.0694  | 2.0056 | 4.7E+04 | 1 | 1 | <a href="#">1</a>  |
| 1076 | 6.65 | 505.3014 | 507.3061 | 542.4861  | 2.0047 | 6.3E+04 | 2 | 2 | <a href="#">3</a>  |
| 1095 | 6.68 | 457.0875 | 459.0938 | 446.0584  | 2.0063 | 1.4E+04 | 2 | 2 | <a href="#">1</a>  |
| 1105 | 6.72 | 309.0906 | 311.0971 | 75.0323   | 2.0065 | 4.8E+06 | 1 | 1 | <a href="#">1</a>  |
| 1114 | 6.74 | 704.3956 | 706.3980 | 470.3373  | 2.0023 | 6.4E+04 | 1 | 1 | <a href="#">1</a>  |
| 1289 | 6.94 | 505.3004 | 507.3048 | 542.4841  | 2.0044 | 8.4E+03 | 2 | 2 | <a href="#">3</a>  |
| 1357 | 6.98 | 365.1165 | 367.1222 | 131.0582  | 2.0057 | 1.3E+04 | 1 | 1 | <a href="#">8</a>  |
| 1366 | 6.98 | 308.1425 | 310.1486 | 74.0841   | 2.0062 | 7.9E+04 | 1 | 1 | <a href="#">1</a>  |
| 1371 | 6.99 | 335.1663 | 337.1723 | 202.2159  | 2.0061 | 1.1E+05 | 2 | 2 | <a href="#">1</a>  |
| 1429 | 7.02 | 480.1796 | 482.1854 | 246.1212  | 2.0059 | 9.1E+03 | 1 | 1 | <a href="#">2</a>  |
| 1448 | 7.04 | 669.3243 | 673.3381 | 202.2149  | 4.0138 | 3.8E+04 | 1 | 2 | <a href="#">1</a>  |
| 1456 | 7.04 | 326.1060 | 328.1122 | 92.0477   | 2.0062 | 8.0E+03 | 1 | 1 | <a href="#">1</a>  |
| 1478 | 7.07 | 367.0953 | 369.1023 | 133.0370  | 2.0070 | 2.1E+04 | 1 | 1 | <a href="#">3</a>  |
| 1519 | 7.11 | 616.3649 | 618.3776 | 382.3066  | 2.0127 | 6.8E+03 | 1 | 1 | <a href="#">2</a>  |
| 1530 | 7.12 | 464.1485 | 466.1540 | 230.0901  | 2.0055 | 9.1E+03 | 1 | 1 | <a href="#">1</a>  |
| 1557 | 7.16 | 669.3245 | 673.3377 | 202.2151  | 4.0132 | 2.7E+04 | 1 | 2 | <a href="#">1</a>  |
| 1561 | 7.18 | 637.1257 | 641.1429 | 170.0163  | 4.0172 | 9.4E+03 | 1 | 2 | <a href="#">1</a>  |
| 1566 | 7.20 | 531.1468 | 533.1537 | 297.0885  | 2.0069 | 2.6E+04 | 1 | 1 | <a href="#">1</a>  |
| 1570 | 7.22 | 348.1379 | 350.1439 | 114.0796  | 2.0060 | 2.0E+04 | 1 | 1 | <a href="#">1</a>  |
| 1575 | 7.23 | 478.1110 | 480.1172 | 488.1053  | 2.0062 | 8.4E+03 | 2 | 2 | <a href="#">1</a>  |
| 1581 | 7.24 | 344.1068 | 346.1131 | 110.0485  | 2.0062 | 1.6E+04 | 1 | 1 | <a href="#">1</a>  |
| 1582 | 7.24 | 364.1690 | 366.1752 | 130.1107  | 2.0062 | 5.6E+04 | 1 | 1 | <a href="#">1</a>  |
| 1588 | 7.27 | 335.1663 | 337.1685 | 202.2159  | 2.0023 | 9.5E+03 | 2 | 2 | <a href="#">1</a>  |



|      |      |          |          |          |        |         |   |   |                   |
|------|------|----------|----------|----------|--------|---------|---|---|-------------------|
| 1597 | 7.33 | 406.1423 | 408.1496 | 172.0840 | 2.0073 | 1.2E+04 | 1 | 1 | <a href="#">2</a> |
| 1608 | 7.42 | 398.1261 | 400.1298 | 164.0678 | 2.0037 | 1.5E+04 | 1 | 1 | <a href="#">6</a> |
| 1620 | 7.54 | 366.0639 | 368.0702 | 132.0055 | 2.0063 | 9.8E+03 | 1 | 1 | <a href="#">1</a> |
| 1623 | 7.63 | 353.1167 | 355.1229 | 119.0583 | 2.0062 | 6.8E+04 | 1 | 1 | <a href="#">3</a> |
| 1624 | 7.65 | 517.1491 | 519.1555 | 283.0908 | 2.0064 | 1.9E+04 | 1 | 1 | <a href="#">2</a> |
| 1625 | 7.65 | 366.1001 | 368.1067 | 132.0417 | 2.0067 | 3.4E+04 | 1 | 1 | <a href="#">7</a> |
| 1626 | 7.65 | 408.1216 | 410.1284 | 174.0633 | 2.0068 | 2.9E+04 | 1 | 1 | <a href="#">2</a> |
| 1628 | 7.72 | 323.1062 | 325.1127 | 89.0478  | 2.0065 | 1.1E+07 | 1 | 1 | <a href="#">4</a> |
| 1630 | 7.81 | 592.1236 | 596.1369 | 125.0143 | 4.0132 | 1.0E+04 | 1 | 2 | <a href="#">1</a> |
| 1634 | 7.87 | 502.1392 | 504.1457 | 268.0809 | 2.0065 | 6.8E+04 | 1 | 1 | <a href="#">3</a> |
| 1635 | 7.87 | 366.1005 | 368.1074 | 132.0422 | 2.0069 | 1.2E+05 | 1 | 1 | <a href="#">7</a> |
| 1636 | 7.89 | 460.1168 | 462.1235 | 226.0585 | 2.0066 | 6.6E+03 | 1 | 1 | <a href="#">1</a> |
| 1637 | 7.91 | 350.1527 | 352.1595 | 116.0944 | 2.0067 | 7.0E+03 | 1 | 1 | <a href="#">1</a> |
| 1638 | 7.93 | 466.1636 | 468.1706 | 232.1053 | 2.0070 | 7.7E+03 | 1 | 1 | <a href="#">2</a> |
| 1642 | 7.97 | 385.1074 | 387.1136 | 151.0491 | 2.0062 | 4.0E+04 | 1 | 1 | <a href="#">3</a> |
| 1643 | 7.98 | 406.1428 | 408.1489 | 172.0845 | 2.0061 | 8.4E+03 | 1 | 1 | <a href="#">2</a> |
| 1647 | 8.04 | 348.1381 | 350.1447 | 114.0798 | 2.0066 | 1.1E+05 | 1 | 1 | <a href="#">1</a> |
| 1648 | 8.04 | 366.1005 | 368.1068 | 132.0421 | 2.0064 | 5.6E+04 | 1 | 1 | <a href="#">7</a> |
| 1649 | 8.04 | 478.1280 | 480.1345 | 244.0697 | 2.0065 | 3.9E+05 | 1 | 1 | <a href="#">2</a> |
| 1650 | 8.09 | 315.1084 | 317.1156 | 162.1002 | 2.0072 | 7.3E+03 | 2 | 2 | <a href="#">1</a> |
| 1653 | 8.09 | 396.1354 | 398.1411 | 324.1542 | 2.0057 | 7.7E+03 | 2 | 2 | <a href="#">1</a> |
| 1656 | 8.10 | 477.1613 | 479.1664 | 486.2059 | 2.0051 | 1.9E+04 | 2 | 2 | <a href="#">1</a> |
| 1657 | 8.10 | 735.1904 | 739.2044 | 268.0810 | 4.0140 | 2.3E+04 | 1 | 2 | <a href="#">3</a> |
| 1659 | 8.11 | 599.1517 | 603.1653 | 132.0423 | 4.0136 | 2.4E+04 | 1 | 2 | <a href="#">7</a> |
| 1665 | 8.18 | 409.1423 | 411.1482 | 175.0839 | 2.0059 | 2.3E+04 | 1 | 1 | <a href="#">1</a> |
| 1666 | 8.19 | 381.1113 | 383.1182 | 147.0530 | 2.0069 | 5.9E+04 | 1 | 1 | <a href="#">6</a> |
| 1673 | 8.25 | 396.1106 | 398.1167 | 162.0523 | 2.0061 | 1.6E+04 | 1 | 1 | <a href="#">5</a> |
| 1692 | 8.29 | 386.0924 | 388.0983 | 152.0341 | 2.0059 | 1.1E+04 | 1 | 1 | <a href="#">3</a> |
| 1729 | 8.33 | 367.0960 | 369.1022 | 133.0377 | 2.0062 | 2.0E+04 | 1 | 1 | <a href="#">3</a> |
| 1732 | 8.33 | 322.0741 | 324.0805 | 88.0158  | 2.0064 | 8.8E+03 | 1 | 1 | <a href="#">2</a> |
| 1742 | 8.35 | 381.1115 | 383.1179 | 147.0532 | 2.0064 | 3.1E+04 | 1 | 1 | <a href="#">6</a> |
| 1768 | 8.41 | 586.8538 | 588.8557 | 705.5910 | 2.0019 | 7.4E+03 | 2 | 2 | <a href="#">1</a> |
| 1769 | 8.42 | 422.1740 | 424.1808 | 188.1156 | 2.0068 | 8.6E+03 | 1 | 1 | <a href="#">3</a> |
| 1779 | 8.44 | 494.1943 | 496.2004 | 260.1360 | 2.0061 | 9.3E+03 | 1 | 1 | <a href="#">2</a> |
| 1795 | 8.45 | 335.1659 | 337.1717 | 202.2151 | 2.0058 | 6.2E+03 | 2 | 2 | <a href="#">1</a> |
| 1802 | 8.47 | 396.1107 | 398.1167 | 162.0524 | 2.0060 | 1.3E+04 | 1 | 1 | <a href="#">5</a> |
| 1814 | 8.48 | 453.1686 | 455.1752 | 219.1103 | 2.0066 | 3.4E+04 | 1 | 1 | <a href="#">1</a> |
| 1819 | 8.50 | 381.1116 | 383.1183 | 147.0533 | 2.0067 | 5.2E+04 | 1 | 1 | <a href="#">6</a> |
| 1849 | 8.54 | 669.3254 | 673.3375 | 202.2161 | 4.0121 | 8.8E+03 | 1 | 2 | <a href="#">1</a> |
| 1867 | 8.56 | 395.1264 | 397.1333 | 161.0680 | 2.0069 | 2.1E+04 | 1 | 1 | <a href="#">1</a> |
| 1885 | 8.59 | 309.1267 | 311.1331 | 75.0684  | 2.0064 | 3.2E+04 | 1 | 1 | <a href="#">2</a> |
| 1903 | 8.63 | 366.1003 | 368.1074 | 132.0420 | 2.0071 | 1.2E+04 | 1 | 1 | <a href="#">7</a> |
| 1912 | 8.68 | 402.0859 | 404.0926 | 168.0276 | 2.0067 | 1.6E+04 | 1 | 1 | <a href="#">1</a> |
| 1917 | 8.74 | 385.1078 | 387.1141 | 151.0495 | 2.0062 | 1.7E+05 | 1 | 1 | <a href="#">3</a> |
| 1922 | 8.81 | 395.1273 | 397.1341 | 161.0690 | 2.0068 | 3.3E+05 | 1 | 1 | <a href="#">1</a> |
| 1926 | 8.85 | 337.1220 | 339.1286 | 103.0637 | 2.0065 | 3.3E+04 | 1 | 1 | <a href="#">8</a> |
| 1939 | 8.94 | 407.5895 | 409.5963 | 347.0624 | 2.0068 | 1.6E+04 | 2 | 2 | <a href="#">4</a> |

|      |       |          |          |          |        |         |   |   |                   |
|------|-------|----------|----------|----------|--------|---------|---|---|-------------------|
| 1941 | 8.95  | 370.0970 | 372.1038 | 136.0387 | 2.0067 | 1.9E+05 | 1 | 1 | <a href="#">1</a> |
| 1943 | 8.97  | 460.1174 | 462.1240 | 226.0591 | 2.0065 | 5.3E+05 | 1 | 1 | <a href="#">1</a> |
| 1946 | 9.02  | 397.0885 | 399.0949 | 163.0302 | 2.0064 | 1.0E+04 | 1 | 1 | <a href="#">1</a> |
| 1950 | 9.10  | 309.0907 | 311.0978 | 75.0324  | 2.0071 | 8.5E+03 | 1 | 1 | <a href="#">1</a> |
| 1951 | 9.12  | 422.1735 | 424.1816 | 188.1152 | 2.0081 | 8.1E+03 | 1 | 1 | <a href="#">3</a> |
| 1952 | 9.19  | 494.1951 | 496.2022 | 260.1368 | 2.0071 | 9.8E+03 | 1 | 1 | <a href="#">2</a> |
| 1954 | 9.24  | 398.1265 | 400.1328 | 164.0682 | 2.0064 | 1.5E+04 | 1 | 1 | <a href="#">6</a> |
| 1957 | 9.25  | 386.0920 | 388.0983 | 152.0336 | 2.0064 | 9.3E+04 | 1 | 1 | <a href="#">3</a> |
| 1962 | 9.29  | 408.1585 | 410.1649 | 174.1002 | 2.0064 | 9.1E+03 | 1 | 1 | <a href="#">1</a> |
| 1967 | 9.42  | 307.1113 | 309.1176 | 73.0530  | 2.0063 | 2.3E+04 | 1 | 1 | <a href="#">3</a> |
| 1968 | 9.43  | 321.0905 | 323.0972 | 87.0322  | 2.0067 | 2.9E+04 | 1 | 1 | <a href="#">1</a> |
| 1970 | 9.45  | 422.1735 | 424.1805 | 188.1152 | 2.0070 | 7.3E+03 | 1 | 1 | <a href="#">3</a> |
| 1972 | 9.50  | 425.1198 | 427.1266 | 191.0615 | 2.0068 | 1.3E+04 | 1 | 1 | <a href="#">1</a> |
| 1973 | 9.50  | 351.1013 | 353.1072 | 117.0430 | 2.0059 | 1.5E+04 | 1 | 1 | <a href="#">3</a> |
| 1974 | 9.53  | 363.1012 | 365.1077 | 129.0429 | 2.0064 | 5.5E+04 | 1 | 1 | <a href="#">5</a> |
| 1977 | 9.57  | 376.0961 | 378.1026 | 142.0377 | 2.0065 | 1.6E+04 | 1 | 1 | <a href="#">1</a> |
| 1979 | 9.58  | 337.1218 | 339.1283 | 103.0634 | 2.0065 | 9.1E+04 | 1 | 1 | <a href="#">8</a> |
| 1985 | 9.59  | 323.1059 | 325.1129 | 89.0476  | 2.0070 | 3.5E+04 | 1 | 1 | <a href="#">4</a> |
| 1986 | 9.59  | 321.1268 | 323.1321 | 87.0685  | 2.0053 | 2.8E+04 | 1 | 1 | <a href="#">1</a> |
| 1991 | 9.60  | 409.1061 | 411.1132 | 175.0478 | 2.0071 | 4.0E+04 | 1 | 1 | <a href="#">2</a> |
| 2000 | 9.70  | 363.1013 | 365.1078 | 129.0430 | 2.0065 | 6.4E+06 | 1 | 1 | <a href="#">5</a> |
| 2002 | 9.78  | 341.5866 | 343.5934 | 215.0566 | 2.0068 | 2.1E+04 | 2 | 2 | <a href="#">1</a> |
| 2008 | 9.81  | 369.0944 | 371.1001 | 135.0361 | 2.0057 | 2.3E+04 | 1 | 1 | <a href="#">2</a> |
| 2012 | 9.85  | 370.0968 | 372.1031 | 136.0385 | 2.0063 | 9.2E+04 | 1 | 1 | <a href="#">1</a> |
| 2015 | 9.88  | 321.1269 | 323.1334 | 87.0686  | 2.0064 | 8.6E+04 | 1 | 1 | <a href="#">1</a> |
| 2020 | 9.93  | 422.1741 | 424.1801 | 188.1158 | 2.0060 | 2.2E+04 | 1 | 1 | <a href="#">3</a> |
| 2021 | 9.94  | 480.1796 | 482.1861 | 246.1213 | 2.0064 | 1.1E+04 | 1 | 1 | <a href="#">2</a> |
| 2025 | 9.97  | 315.1086 | 317.1155 | 162.1006 | 2.0069 | 9.9E+03 | 2 | 2 | <a href="#">1</a> |
| 2038 | 10.13 | 377.1170 | 379.1233 | 143.0586 | 2.0063 | 2.3E+04 | 1 | 1 | <a href="#">1</a> |
| 2065 | 10.35 | 494.1955 | 496.2010 | 260.1372 | 2.0055 | 1.1E+04 | 1 | 1 | <a href="#">2</a> |
| 2068 | 10.37 | 660.1463 | 662.1501 | 426.0880 | 2.0038 | 6.4E+03 | 1 | 1 | <a href="#">1</a> |
| 2070 | 10.38 | 447.1028 | 449.1094 | 426.0889 | 2.0066 | 8.4E+05 | 2 | 2 | <a href="#">1</a> |
| 2076 | 10.39 | 356.1067 | 358.1130 | 122.0484 | 2.0063 | 1.0E+04 | 1 | 1 | <a href="#">1</a> |
| 2095 | 10.56 | 323.1063 | 325.1129 | 89.0479  | 2.0066 | 6.1E+04 | 1 | 1 | <a href="#">4</a> |
| 2098 | 10.58 | 711.3358 | 715.3492 | 244.2265 | 4.0134 | 1.0E+04 | 1 | 2 | <a href="#">1</a> |
| 2104 | 10.62 | 455.0948 | 457.1021 | 221.0365 | 2.0074 | 1.7E+04 | 1 | 1 | <a href="#">1</a> |
| 2124 | 10.79 | 348.1378 | 350.1436 | 114.0795 | 2.0057 | 5.8E+04 | 1 | 1 | <a href="#">1</a> |
| 2126 | 10.82 | 369.1129 | 371.1194 | 135.0546 | 2.0065 | 9.5E+04 | 1 | 1 | <a href="#">1</a> |
| 2137 | 10.91 | 409.1425 | 411.1492 | 175.0842 | 2.0066 | 1.7E+04 | 1 | 1 | <a href="#">1</a> |
| 2139 | 10.94 | 349.1219 | 351.1317 | 115.0636 | 2.0098 | 9.0E+03 | 1 | 1 | <a href="#">2</a> |
| 2144 | 11.00 | 370.0967 | 372.1030 | 136.0383 | 2.0064 | 4.3E+04 | 1 | 1 | <a href="#">1</a> |
| 2148 | 11.02 | 460.1175 | 462.1230 | 226.0592 | 2.0055 | 7.6E+03 | 1 | 1 | <a href="#">1</a> |
| 2174 | 11.20 | 379.2159 | 381.2219 | 145.1576 | 2.0060 | 1.6E+04 | 1 | 1 | <a href="#">1</a> |
| 2175 | 11.20 | 612.2667 | 616.2804 | 145.1574 | 4.0137 | 3.2E+04 | 1 | 2 | <a href="#">1</a> |
| 2178 | 11.21 | 383.1098 | 385.1159 | 149.0515 | 2.0060 | 3.9E+05 | 1 | 1 | <a href="#">1</a> |
| 2185 | 11.22 | 306.6375 | 308.6439 | 145.1584 | 2.0064 | 2.1E+05 | 2 | 2 | <a href="#">1</a> |
| 2195 | 11.28 | 448.1891 | 450.1956 | 214.1308 | 2.0065 | 1.1E+04 | 1 | 1 | <a href="#">1</a> |

|      |       |          |          |          |        |         |   |   |                    |
|------|-------|----------|----------|----------|--------|---------|---|---|--------------------|
| 2207 | 11.31 | 735.1907 | 739.2032 | 268.0814 | 4.0125 | 1.7E+04 | 1 | 2 | <a href="#">3</a>  |
| 2234 | 11.38 | 612.2668 | 616.2806 | 145.1574 | 4.0139 | 1.5E+04 | 1 | 2 | <a href="#">1</a>  |
| 2244 | 11.48 | 422.1743 | 424.1803 | 188.1160 | 2.0060 | 2.6E+04 | 1 | 1 | <a href="#">3</a>  |
| 2248 | 11.50 | 408.1694 | 410.1748 | 174.1111 | 2.0054 | 7.3E+03 | 1 | 1 | <a href="#">2</a>  |
| 2249 | 11.51 | 321.1142 | 323.1209 | 174.1118 | 2.0067 | 3.1E+04 | 2 | 2 | <a href="#">2</a>  |
| 2256 | 11.57 | 760.3451 | 762.3469 | 526.2867 | 2.0019 | 1.5E+04 | 1 | 1 | <a href="#">2</a>  |
| 2388 | 11.75 | 400.0851 | 402.0910 | 166.0267 | 2.0059 | 1.5E+04 | 1 | 1 | <a href="#">3</a>  |
| 2390 | 11.76 | 612.2673 | 616.2813 | 145.1579 | 4.0140 | 7.5E+03 | 1 | 2 | <a href="#">1</a>  |
| 2411 | 11.77 | 324.0903 | 326.0968 | 90.0319  | 2.0066 | 1.4E+04 | 1 | 1 | <a href="#">5</a>  |
| 2443 | 11.80 | 438.1477 | 440.1542 | 204.0894 | 2.0065 | 2.2E+05 | 1 | 1 | <a href="#">1</a>  |
| 2465 | 11.82 | 337.0856 | 339.0929 | 103.0273 | 2.0073 | 1.2E+05 | 1 | 1 | <a href="#">2</a>  |
| 2466 | 11.82 | 322.1109 | 324.1169 | 88.0526  | 2.0060 | 1.1E+04 | 1 | 1 | <a href="#">3</a>  |
| 2481 | 11.83 | 371.6323 | 373.6395 | 275.1481 | 2.0072 | 9.4E+03 | 2 | 2 | <a href="#">2</a>  |
| 2562 | 11.89 | 521.2875 | 523.2992 | 574.4584 | 2.0116 | 1.0E+04 | 2 | 2 | <a href="#">2</a>  |
| 2597 | 11.92 | 939.5171 | 941.5196 | 705.4588 | 2.0025 | 2.9E+04 | 1 | 1 | <a href="#">4</a>  |
| 2700 | 12.21 | 364.6250 | 366.6318 | 261.1334 | 2.0068 | 1.3E+04 | 2 | 2 | <a href="#">3</a>  |
| 2706 | 12.28 | 337.1219 | 339.1283 | 103.0635 | 2.0065 | 1.8E+05 | 1 | 1 | <a href="#">8</a>  |
| 2717 | 12.43 | 500.2211 | 502.2245 | 266.1628 | 2.0034 | 1.8E+04 | 1 | 1 | <a href="#">1</a>  |
| 2719 | 12.50 | 336.0901 | 338.0960 | 102.0318 | 2.0059 | 8.5E+03 | 1 | 1 | <a href="#">6</a>  |
| 2723 | 12.59 | 578.1894 | 582.2027 | 111.0801 | 4.0132 | 1.1E+04 | 1 | 2 | <a href="#">1</a>  |
| 2724 | 12.61 | 364.0850 | 366.0902 | 130.0267 | 2.0052 | 9.9E+03 | 1 | 1 | <a href="#">4</a>  |
| 2729 | 12.72 | 390.1113 | 392.1180 | 156.0530 | 2.0067 | 1.3E+04 | 1 | 1 | <a href="#">3</a>  |
| 2733 | 12.75 | 592.1245 | 596.1374 | 125.0151 | 4.0129 | 8.0E+03 | 1 | 2 | <a href="#">1</a>  |
| 2735 | 12.75 | 364.6245 | 366.6311 | 261.1323 | 2.0066 | 1.8E+04 | 2 | 2 | <a href="#">3</a>  |
| 2747 | 12.88 | 582.1052 | 584.1121 | 348.0469 | 2.0069 | 1.2E+04 | 1 | 1 | <a href="#">3</a>  |
| 2750 | 12.93 | 396.1103 | 398.1183 | 162.0520 | 2.0080 | 8.9E+03 | 1 | 1 | <a href="#">5</a>  |
| 2752 | 12.94 | 324.0898 | 326.0967 | 180.0629 | 2.0069 | 2.7E+04 | 2 | 2 | <a href="#">14</a> |
| 2754 | 12.95 | 599.1520 | 603.1645 | 132.0427 | 4.0125 | 1.3E+04 | 1 | 2 | <a href="#">7</a>  |
| 2755 | 12.96 | 735.1910 | 739.2041 | 268.0817 | 4.0130 | 1.1E+04 | 1 | 2 | <a href="#">3</a>  |
| 2758 | 12.98 | 363.1368 | 365.1433 | 129.0785 | 2.0065 | 2.8E+04 | 1 | 1 | <a href="#">4</a>  |
| 2761 | 13.00 | 371.6318 | 373.6388 | 275.1471 | 2.0070 | 9.1E+03 | 2 | 2 | <a href="#">2</a>  |
| 2762 | 13.01 | 355.6010 | 357.6087 | 243.0853 | 2.0077 | 8.4E+03 | 2 | 2 | <a href="#">1</a>  |
| 2763 | 13.01 | 382.5811 | 384.5876 | 297.0456 | 2.0064 | 2.6E+04 | 2 | 2 | <a href="#">1</a>  |
| 2766 | 13.05 | 597.1151 | 599.1205 | 363.0568 | 2.0054 | 9.9E+03 | 1 | 1 | <a href="#">2</a>  |
| 2769 | 13.06 | 368.0985 | 370.1044 | 268.0803 | 2.0059 | 1.2E+04 | 2 | 2 | <a href="#">4</a>  |
| 2773 | 13.09 | 399.1372 | 401.1437 | 165.0789 | 2.0065 | 1.7E+06 | 1 | 1 | <a href="#">4</a>  |
| 2775 | 13.11 | 462.2047 | 464.2109 | 228.1464 | 2.0062 | 1.3E+04 | 1 | 1 | <a href="#">2</a>  |
| 2778 | 13.15 | 296.5655 | 298.5726 | 125.0144 | 2.0071 | 1.9E+05 | 2 | 2 | <a href="#">1</a>  |
| 2779 | 13.16 | 364.6242 | 366.6312 | 261.1317 | 2.0070 | 7.8E+03 | 2 | 2 | <a href="#">3</a>  |
| 2780 | 13.27 | 372.1245 | 374.1303 | 276.1323 | 2.0058 | 1.6E+04 | 2 | 2 | <a href="#">1</a>  |
| 2797 | 13.39 | 365.1532 | 367.1597 | 131.0949 | 2.0065 | 2.0E+06 | 1 | 1 | <a href="#">6</a>  |
| 2801 | 13.50 | 319.1111 | 321.1176 | 85.0528  | 2.0065 | 2.1E+05 | 1 | 1 | <a href="#">1</a>  |
| 2802 | 13.50 | 421.1425 | 423.1488 | 187.0841 | 2.0064 | 1.3E+04 | 1 | 1 | <a href="#">1</a>  |
| 2803 | 13.51 | 462.2046 | 464.2126 | 228.1463 | 2.0080 | 9.7E+03 | 1 | 1 | <a href="#">2</a>  |
| 2806 | 13.56 | 379.1318 | 381.1381 | 145.0734 | 2.0064 | 2.1E+04 | 1 | 1 | <a href="#">6</a>  |
| 2810 | 13.58 | 348.1013 | 350.1070 | 114.0429 | 2.0057 | 9.8E+03 | 1 | 1 | <a href="#">2</a>  |
| 2826 | 13.72 | 365.1529 | 367.1593 | 131.0946 | 2.0064 | 4.8E+06 | 1 | 1 | <a href="#">6</a>  |

|      |       |          |          |          |        |         |   |   |                    |
|------|-------|----------|----------|----------|--------|---------|---|---|--------------------|
| 2828 | 13.78 | 429.1117 | 431.1178 | 195.0534 | 2.0061 | 2.4E+04 | 1 | 1 | <a href="#">6</a>  |
| 2829 | 13.79 | 371.6317 | 373.6386 | 275.1468 | 2.0069 | 9.1E+03 | 2 | 2 | <a href="#">2</a>  |
| 2834 | 13.92 | 367.6061 | 369.6125 | 267.0956 | 2.0063 | 1.9E+04 | 2 | 2 | <a href="#">3</a>  |
| 2841 | 13.95 | 372.1012 | 374.1068 | 138.0429 | 2.0056 | 8.0E+03 | 1 | 1 | <a href="#">2</a>  |
| 2846 | 13.96 | 324.0900 | 326.0963 | 180.0634 | 2.0063 | 4.0E+04 | 2 | 2 | <a href="#">14</a> |
| 2862 | 14.05 | 300.0796 | 302.0866 | 132.0426 | 2.0070 | 1.1E+04 | 2 | 2 | <a href="#">7</a>  |
| 2863 | 14.05 | 375.6039 | 377.6106 | 283.0912 | 2.0067 | 1.3E+05 | 2 | 2 | <a href="#">2</a>  |
| 2864 | 14.05 | 307.1109 | 309.1171 | 73.0526  | 2.0061 | 2.2E+04 | 1 | 1 | <a href="#">3</a>  |
| 2867 | 14.06 | 423.1215 | 425.1280 | 189.0632 | 2.0065 | 9.4E+03 | 1 | 1 | <a href="#">2</a>  |
| 2874 | 14.10 | 495.1903 | 497.1965 | 261.1320 | 2.0062 | 6.8E+03 | 1 | 1 | <a href="#">3</a>  |
| 2880 | 14.10 | 364.6247 | 366.6314 | 261.1327 | 2.0068 | 5.7E+04 | 2 | 2 | <a href="#">3</a>  |
| 2882 | 14.12 | 345.0922 | 347.0986 | 222.0678 | 2.0064 | 1.5E+04 | 2 | 2 | <a href="#">3</a>  |
| 2905 | 14.21 | 371.6327 | 373.6391 | 275.1488 | 2.0063 | 1.8E+04 | 2 | 2 | <a href="#">2</a>  |
| 2908 | 14.24 | 371.1059 | 373.1122 | 137.0476 | 2.0063 | 1.3E+04 | 1 | 1 | <a href="#">5</a>  |
| 2909 | 14.24 | 416.1154 | 418.1220 | 182.0571 | 2.0066 | 7.8E+03 | 1 | 1 | <a href="#">6</a>  |
| 2919 | 14.27 | 315.1088 | 317.1158 | 162.1009 | 2.0070 | 7.3E+03 | 2 | 2 | <a href="#">1</a>  |
| 2927 | 14.32 | 342.0790 | 344.0853 | 108.0207 | 2.0062 | 1.1E+04 | 1 | 1 | <a href="#">2</a>  |
| 2930 | 14.34 | 333.1270 | 335.1363 | 99.0687  | 2.0093 | 1.4E+04 | 1 | 1 | <a href="#">1</a>  |
| 2963 | 14.50 | 305.0951 | 307.1018 | 71.0368  | 2.0067 | 9.3E+04 | 1 | 1 | <a href="#">1</a>  |
| 2965 | 14.51 | 300.0853 | 302.0927 | 132.0540 | 2.0074 | 7.5E+03 | 2 | 2 | <a href="#">4</a>  |
| 2968 | 14.54 | 354.0706 | 356.0771 | 240.0246 | 2.0065 | 2.6E+05 | 2 | 2 | <a href="#">1</a>  |
| 2997 | 14.79 | 376.0965 | 378.1030 | 284.0764 | 2.0065 | 9.5E+03 | 2 | 2 | <a href="#">1</a>  |
| 3007 | 15.02 | 360.1127 | 362.1190 | 126.0544 | 2.0063 | 1.1E+04 | 1 | 1 | <a href="#">2</a>  |
| 3013 | 15.03 | 366.1006 | 368.1074 | 132.0423 | 2.0069 | 2.6E+05 | 1 | 1 | <a href="#">7</a>  |
| 3022 | 15.12 | 402.0999 | 404.1058 | 168.0416 | 2.0059 | 1.4E+05 | 1 | 1 | <a href="#">7</a>  |
| 3032 | 15.29 | 366.1004 | 368.1071 | 132.0421 | 2.0067 | 3.0E+04 | 1 | 1 | <a href="#">7</a>  |
| 3037 | 15.32 | 776.3307 | 778.3353 | 542.2723 | 2.0046 | 1.1E+04 | 1 | 1 | <a href="#">1</a>  |
| 3048 | 15.38 | 365.1163 | 367.1230 | 131.0580 | 2.0067 | 1.6E+04 | 1 | 1 | <a href="#">8</a>  |
| 3052 | 15.44 | 425.1161 | 427.1217 | 191.0578 | 2.0055 | 2.0E+04 | 1 | 1 | <a href="#">1</a>  |
| 3069 | 15.65 | 368.0987 | 370.1055 | 268.0807 | 2.0068 | 2.6E+05 | 2 | 2 | <a href="#">4</a>  |
| 3075 | 15.69 | 599.1515 | 603.1653 | 132.0421 | 4.0138 | 2.8E+04 | 1 | 2 | <a href="#">7</a>  |
| 3087 | 15.76 | 414.1222 | 416.1289 | 180.0639 | 2.0067 | 9.3E+03 | 1 | 1 | <a href="#">17</a> |
| 3102 | 15.95 | 389.1274 | 391.1342 | 155.0691 | 2.0067 | 7.3E+03 | 1 | 1 | <a href="#">1</a>  |
| 3105 | 15.98 | 741.3908 | 743.3936 | 507.3325 | 2.0028 | 7.6E+03 | 1 | 1 | <a href="#">2</a>  |
| 3106 | 15.98 | 660.1826 | 664.1960 | 193.0732 | 4.0134 | 4.1E+04 | 1 | 2 | <a href="#">3</a>  |
| 3110 | 16.03 | 342.6297 | 344.6365 | 217.1427 | 2.0069 | 9.0E+03 | 2 | 2 | <a href="#">1</a>  |
| 3120 | 16.23 | 741.3913 | 743.3961 | 507.3330 | 2.0048 | 8.2E+03 | 1 | 1 | <a href="#">2</a>  |
| 3131 | 16.30 | 451.2000 | 453.2038 | 217.1417 | 2.0038 | 7.2E+03 | 1 | 1 | <a href="#">1</a>  |
| 3132 | 16.37 | 397.1243 | 399.1302 | 163.0660 | 2.0059 | 1.5E+04 | 1 | 1 | <a href="#">1</a>  |
| 3136 | 16.47 | 741.3896 | 743.3916 | 507.3313 | 2.0019 | 9.6E+03 | 1 | 1 | <a href="#">2</a>  |
| 3146 | 16.62 | 319.1110 | 321.1179 | 85.0527  | 2.0068 | 7.8E+04 | 1 | 1 | <a href="#">1</a>  |
| 3147 | 16.62 | 368.0990 | 370.1061 | 268.0814 | 2.0071 | 8.3E+03 | 2 | 2 | <a href="#">3</a>  |
| 3155 | 16.77 | 411.1040 | 413.1104 | 177.0457 | 2.0064 | 8.4E+03 | 1 | 1 | <a href="#">1</a>  |
| 3156 | 16.78 | 366.1479 | 368.1548 | 132.0895 | 2.0070 | 6.2E+03 | 1 | 1 | <a href="#">2</a>  |
| 3158 | 16.80 | 300.1035 | 302.1103 | 132.0903 | 2.0068 | 1.1E+06 | 2 | 2 | <a href="#">2</a>  |
| 3163 | 16.86 | 528.1619 | 532.1754 | 61.0526  | 4.0135 | 7.3E+03 | 1 | 2 | <a href="#">1</a>  |
| 3170 | 17.02 | 386.1052 | 388.1119 | 152.0469 | 2.0067 | 8.2E+03 | 1 | 1 | <a href="#">9</a>  |

|      |       |          |          |          |        |         |   |   |                    |
|------|-------|----------|----------|----------|--------|---------|---|---|--------------------|
| 3171 | 17.03 | 425.1157 | 427.1216 | 191.0574 | 2.0060 | 2.2E+04 | 1 | 1 | <a href="#">1</a>  |
| 3174 | 17.07 | 379.1318 | 381.1386 | 145.0734 | 2.0068 | 1.3E+04 | 1 | 1 | <a href="#">6</a>  |
| 3179 | 17.13 | 324.0898 | 326.0963 | 180.0629 | 2.0065 | 7.8E+03 | 2 | 2 | <a href="#">14</a> |
| 3184 | 17.24 | 741.3895 | 743.3944 | 507.3312 | 2.0049 | 1.2E+04 | 1 | 1 | <a href="#">2</a>  |
| 3206 | 17.36 | 266.0845 | 268.0911 | 32.0262  | 2.0066 | 1.1E+04 | 1 | 1 | <a href="#">1</a>  |
| 3211 | 17.45 | 266.0844 | 268.0912 | 32.0261  | 2.0067 | 1.4E+04 | 1 | 1 | <a href="#">1</a>  |
| 3212 | 17.47 | 423.1000 | 425.1090 | 189.0417 | 2.0091 | 7.5E+03 | 1 | 1 | <a href="#">1</a>  |
| 3214 | 17.58 | 452.1630 | 454.1687 | 218.1046 | 2.0057 | 1.1E+04 | 1 | 1 | <a href="#">1</a>  |
| 3221 | 17.66 | 266.0845 | 268.0909 | 32.0262  | 2.0063 | 1.6E+04 | 1 | 1 | <a href="#">1</a>  |
| 3227 | 17.68 | 308.0948 | 310.1017 | 74.0364  | 2.0069 | 1.5E+04 | 1 | 1 | <a href="#">5</a>  |
| 3229 | 17.69 | 599.1516 | 603.1650 | 132.0423 | 4.0134 | 3.3E+04 | 1 | 2 | <a href="#">7</a>  |
| 3234 | 17.71 | 367.6067 | 369.6136 | 267.0968 | 2.0069 | 4.3E+05 | 2 | 2 | <a href="#">2</a>  |
| 3244 | 17.76 | 356.0931 | 358.0996 | 244.0696 | 2.0065 | 2.9E+04 | 2 | 2 | <a href="#">2</a>  |
| 3245 | 17.76 | 460.1167 | 462.1230 | 226.0584 | 2.0063 | 1.4E+04 | 1 | 1 | <a href="#">1</a>  |
| 3246 | 17.76 | 474.1795 | 476.1862 | 240.1212 | 2.0067 | 2.5E+04 | 1 | 1 | <a href="#">3</a>  |
| 3249 | 17.77 | 354.1198 | 356.1225 | 240.1230 | 2.0027 | 2.7E+04 | 2 | 2 | <a href="#">3</a>  |
| 3251 | 17.78 | 307.1111 | 309.1179 | 73.0528  | 2.0068 | 1.8E+04 | 1 | 1 | <a href="#">3</a>  |
| 3256 | 17.81 | 741.3888 | 743.3960 | 507.3305 | 2.0072 | 1.4E+04 | 1 | 1 | <a href="#">2</a>  |
| 3260 | 17.85 | 711.1777 | 715.1930 | 244.0684 | 4.0152 | 7.5E+03 | 1 | 2 | <a href="#">2</a>  |
| 3261 | 17.85 | 402.1010 | 404.1066 | 168.0426 | 2.0056 | 1.1E+04 | 1 | 1 | <a href="#">7</a>  |
| 3262 | 17.85 | 460.1643 | 462.1706 | 226.1060 | 2.0062 | 3.8E+04 | 1 | 1 | <a href="#">1</a>  |
| 3264 | 17.86 | 347.1115 | 349.1187 | 226.1063 | 2.0072 | 1.9E+04 | 2 | 2 | <a href="#">1</a>  |
| 3265 | 17.87 | 380.1639 | 382.1704 | 146.1056 | 2.0065 | 1.4E+04 | 1 | 1 | <a href="#">4</a>  |
| 3286 | 17.94 | 307.1113 | 309.1179 | 146.1060 | 2.0066 | 3.0E+06 | 2 | 2 | <a href="#">4</a>  |
| 3290 | 17.96 | 407.1629 | 409.1701 | 173.1046 | 2.0072 | 9.2E+03 | 1 | 1 | <a href="#">4</a>  |
| 3298 | 18.11 | 372.0894 | 374.0959 | 138.0311 | 2.0065 | 6.3E+04 | 1 | 1 | <a href="#">4</a>  |
| 3312 | 18.34 | 356.0931 | 358.0997 | 244.0696 | 2.0066 | 1.2E+04 | 2 | 2 | <a href="#">2</a>  |
| 3320 | 18.38 | 427.1313 | 429.1383 | 193.0730 | 2.0070 | 2.3E+04 | 1 | 1 | <a href="#">3</a>  |
| 3321 | 18.38 | 421.2260 | 423.2319 | 187.1677 | 2.0059 | 9.5E+03 | 1 | 1 | <a href="#">2</a>  |
| 3323 | 18.39 | 327.6423 | 329.6491 | 187.1680 | 2.0067 | 7.0E+04 | 2 | 2 | <a href="#">2</a>  |
| 3326 | 18.41 | 308.1424 | 310.1487 | 74.0841  | 2.0063 | 5.0E+04 | 1 | 1 | <a href="#">1</a>  |
| 3331 | 18.44 | 271.1003 | 273.1061 | 74.0840  | 2.0058 | 1.8E+04 | 2 | 2 | <a href="#">1</a>  |
| 3334 | 18.44 | 741.3900 | 743.3962 | 507.3317 | 2.0062 | 1.6E+04 | 1 | 1 | <a href="#">2</a>  |
| 3337 | 18.45 | 436.2731 | 438.2788 | 202.2147 | 2.0057 | 3.9E+04 | 1 | 1 | <a href="#">1</a>  |
| 3342 | 18.47 | 335.1662 | 337.1730 | 202.2159 | 2.0067 | 3.4E+05 | 2 | 2 | <a href="#">1</a>  |
| 3366 | 18.58 | 622.1789 | 626.1922 | 155.0696 | 4.0133 | 2.7E+05 | 1 | 2 | <a href="#">1</a>  |
| 3369 | 18.60 | 389.1281 | 391.1344 | 155.0697 | 2.0063 | 7.7E+05 | 1 | 1 | <a href="#">1</a>  |
| 3373 | 18.60 | 280.1000 | 282.1065 | 46.0417  | 2.0065 | 1.3E+05 | 1 | 1 | <a href="#">1</a>  |
| 3380 | 18.67 | 735.1900 | 739.2035 | 268.0807 | 4.0135 | 7.0E+03 | 1 | 2 | <a href="#">4</a>  |
| 3381 | 18.70 | 462.2048 | 464.2104 | 228.1464 | 2.0056 | 1.6E+04 | 1 | 1 | <a href="#">2</a>  |
| 3395 | 18.76 | 399.1732 | 401.1794 | 165.1149 | 2.0061 | 5.0E+04 | 1 | 1 | <a href="#">2</a>  |
| 3401 | 18.81 | 366.1010 | 368.1074 | 132.0427 | 2.0064 | 3.2E+04 | 1 | 1 | <a href="#">7</a>  |
| 3402 | 18.81 | 750.2008 | 754.2139 | 283.0915 | 4.0131 | 2.9E+04 | 1 | 2 | <a href="#">2</a>  |
| 3404 | 18.84 | 385.1070 | 387.1138 | 151.0487 | 2.0067 | 3.1E+04 | 1 | 1 | <a href="#">3</a>  |
| 3407 | 18.84 | 517.1502 | 519.1558 | 283.0919 | 2.0055 | 9.3E+03 | 1 | 1 | <a href="#">2</a>  |
| 3414 | 18.92 | 750.2011 | 754.2137 | 283.0918 | 4.0126 | 2.2E+04 | 1 | 2 | <a href="#">2</a>  |
| 3419 | 18.94 | 389.1171 | 391.1256 | 310.1176 | 2.0085 | 9.4E+03 | 2 | 2 | <a href="#">1</a>  |

|      |       |          |          |          |        |         |   |   |                   |
|------|-------|----------|----------|----------|--------|---------|---|---|-------------------|
| 3426 | 19.02 | 307.1109 | 309.1164 | 146.1052 | 2.0054 | 6.8E+03 | 2 | 2 | <a href="#">4</a> |
| 3434 | 19.10 | 393.1472 | 395.1542 | 159.0889 | 2.0070 | 7.6E+04 | 1 | 1 | <a href="#">6</a> |
| 3436 | 19.11 | 741.3892 | 743.3950 | 507.3308 | 2.0059 | 2.1E+04 | 1 | 1 | <a href="#">2</a> |
| 3449 | 19.17 | 266.0844 | 268.0908 | 32.0261  | 2.0063 | 1.0E+04 | 1 | 1 | <a href="#">1</a> |
| 3457 | 19.21 | 379.1684 | 381.1749 | 145.1101 | 2.0064 | 3.8E+04 | 1 | 1 | <a href="#">1</a> |
| 3459 | 19.21 | 366.1008 | 368.1074 | 132.0425 | 2.0066 | 7.6E+05 | 1 | 1 | <a href="#">7</a> |
| 3465 | 19.23 | 502.1388 | 504.1454 | 268.0804 | 2.0067 | 1.3E+04 | 1 | 1 | <a href="#">4</a> |
| 3468 | 19.26 | 357.0900 | 359.0968 | 123.0316 | 2.0068 | 2.4E+04 | 1 | 1 | <a href="#">2</a> |
| 3484 | 19.41 | 735.1898 | 739.2035 | 268.0805 | 4.0136 | 4.0E+04 | 1 | 2 | <a href="#">4</a> |
| 3497 | 19.54 | 358.6008 | 360.6076 | 249.0850 | 2.0068 | 3.2E+04 | 2 | 2 | <a href="#">2</a> |
| 3505 | 19.66 | 336.0902 | 338.0966 | 102.0319 | 2.0063 | 8.8E+03 | 1 | 1 | <a href="#">6</a> |
| 3509 | 19.70 | 741.3898 | 743.3940 | 507.3315 | 2.0042 | 1.5E+04 | 1 | 1 | <a href="#">2</a> |
| 3513 | 19.74 | 699.3688 | 701.3795 | 465.3104 | 2.0107 | 1.3E+04 | 1 | 1 | <a href="#">2</a> |
| 3523 | 19.81 | 379.1683 | 381.1746 | 145.1100 | 2.0063 | 9.8E+04 | 1 | 1 | <a href="#">1</a> |
| 3525 | 19.83 | 356.0927 | 358.0996 | 244.0687 | 2.0069 | 1.1E+04 | 2 | 2 | <a href="#">2</a> |
| 3533 | 20.03 | 598.0994 | 600.1054 | 364.0411 | 2.0060 | 3.0E+04 | 1 | 1 | <a href="#">1</a> |
| 3545 | 20.20 | 711.1779 | 715.1922 | 244.0686 | 4.0143 | 1.2E+04 | 1 | 2 | <a href="#">2</a> |
| 3548 | 20.23 | 460.1177 | 462.1226 | 226.0594 | 2.0049 | 9.4E+03 | 1 | 1 | <a href="#">1</a> |
| 3557 | 20.27 | 298.0877 | 300.0943 | 128.0587 | 2.0067 | 3.7E+05 | 2 | 2 | <a href="#">1</a> |
| 3558 | 20.27 | 356.0931 | 358.0997 | 244.0695 | 2.0066 | 2.1E+04 | 2 | 2 | <a href="#">2</a> |
| 3560 | 20.28 | 362.1169 | 364.1227 | 128.0586 | 2.0057 | 8.9E+03 | 1 | 1 | <a href="#">1</a> |
| 3564 | 20.32 | 741.3893 | 743.3939 | 507.3310 | 2.0047 | 2.3E+04 | 1 | 1 | <a href="#">2</a> |
| 3568 | 20.35 | 346.0746 | 348.0823 | 112.0162 | 2.0077 | 1.4E+04 | 1 | 1 | <a href="#">2</a> |
| 3574 | 20.42 | 488.1957 | 490.2019 | 254.1373 | 2.0062 | 8.4E+03 | 1 | 1 | <a href="#">1</a> |
| 3586 | 20.54 | 741.3906 | 743.3956 | 507.3323 | 2.0050 | 1.3E+04 | 1 | 1 | <a href="#">2</a> |
| 3588 | 20.56 | 294.1161 | 296.1193 | 60.0578  | 2.0032 | 1.7E+04 | 1 | 1 | <a href="#">2</a> |
| 3602 | 20.76 | 741.3908 | 743.3947 | 507.3325 | 2.0039 | 1.3E+04 | 1 | 1 | <a href="#">2</a> |
| 3614 | 20.87 | 321.0664 | 323.0733 | 174.0162 | 2.0069 | 1.9E+04 | 2 | 2 | <a href="#">3</a> |
| 3621 | 20.91 | 300.1033 | 302.1096 | 132.0900 | 2.0062 | 7.4E+03 | 2 | 2 | <a href="#">2</a> |
| 3625 | 20.93 | 396.0929 | 398.0989 | 162.0346 | 2.0059 | 8.1E+03 | 1 | 1 | <a href="#">1</a> |
| 3634 | 20.98 | 699.3690 | 701.3704 | 465.3106 | 2.0014 | 1.3E+04 | 1 | 1 | <a href="#">2</a> |
| 3642 | 21.05 | 423.1404 | 425.1462 | 189.0821 | 2.0058 | 1.4E+04 | 1 | 1 | <a href="#">1</a> |
| 3646 | 21.09 | 711.1792 | 715.1927 | 244.0699 | 4.0135 | 8.9E+03 | 1 | 2 | <a href="#">2</a> |
| 3649 | 21.12 | 366.1005 | 368.1063 | 132.0422 | 2.0058 | 1.5E+04 | 1 | 1 | <a href="#">7</a> |
| 3651 | 21.13 | 478.1267 | 480.1331 | 244.0684 | 2.0064 | 9.8E+03 | 1 | 1 | <a href="#">2</a> |
| 3652 | 21.13 | 346.0860 | 348.0925 | 112.0277 | 2.0065 | 8.3E+03 | 1 | 1 | <a href="#">1</a> |
| 3654 | 21.17 | 336.0900 | 338.0968 | 102.0317 | 2.0067 | 1.1E+04 | 1 | 1 | <a href="#">6</a> |
| 3662 | 21.54 | 321.1082 | 323.1151 | 174.0997 | 2.0069 | 6.6E+04 | 2 | 2 | <a href="#">1</a> |
| 3671 | 22.04 | 370.0973 | 372.1031 | 136.0390 | 2.0058 | 1.3E+05 | 1 | 1 | <a href="#">1</a> |
| 3672 | 22.05 | 735.1901 | 739.2036 | 268.0808 | 4.0135 | 1.4E+05 | 1 | 2 | <a href="#">4</a> |
| 3675 | 22.12 | 297.0855 | 299.0921 | 126.0543 | 2.0066 | 2.6E+04 | 2 | 2 | <a href="#">2</a> |
| 3680 | 22.27 | 741.3894 | 743.3952 | 507.3311 | 2.0058 | 1.6E+04 | 1 | 1 | <a href="#">2</a> |
| 3696 | 22.37 | 396.0935 | 398.0993 | 162.0351 | 2.0058 | 1.3E+04 | 1 | 1 | <a href="#">1</a> |
| 3702 | 22.44 | 382.1587 | 384.1652 | 148.1004 | 2.0064 | 1.2E+05 | 1 | 1 | <a href="#">1</a> |
| 3704 | 22.44 | 737.3578 | 739.3658 | 503.2994 | 2.0081 | 6.3E+03 | 1 | 1 | <a href="#">6</a> |
| 3710 | 22.48 | 365.1315 | 367.1346 | 131.0731 | 2.0031 | 3.9E+04 | 1 | 1 | <a href="#">1</a> |
| 3712 | 22.49 | 715.3755 | 717.3804 | 481.3172 | 2.0049 | 6.2E+03 | 1 | 1 | <a href="#">3</a> |

|      |       |          |          |          |        |         |   |   |                   |
|------|-------|----------|----------|----------|--------|---------|---|---|-------------------|
| 3716 | 22.50 | 501.2412 | 503.2476 | 267.1828 | 2.0065 | 2.6E+04 | 1 | 1 | <a href="#">1</a> |
| 3719 | 22.51 | 741.3901 | 743.3965 | 507.3318 | 2.0064 | 1.2E+04 | 1 | 1 | <a href="#">2</a> |
| 3723 | 22.51 | 314.1193 | 316.1259 | 160.1219 | 2.0066 | 4.0E+04 | 2 | 2 | <a href="#">2</a> |
| 3729 | 22.53 | 375.0773 | 377.0829 | 141.0190 | 2.0056 | 9.2E+03 | 1 | 1 | <a href="#">1</a> |
| 3743 | 22.65 | 687.3443 | 689.3494 | 453.2860 | 2.0051 | 3.4E+05 | 1 | 1 | <a href="#">2</a> |
| 3744 | 22.66 | 715.3770 | 717.3821 | 481.3187 | 2.0051 | 6.5E+03 | 1 | 1 | <a href="#">3</a> |
| 3749 | 22.70 | 741.3898 | 743.3969 | 507.3315 | 2.0071 | 1.1E+04 | 1 | 1 | <a href="#">2</a> |
| 3755 | 22.72 | 370.0961 | 372.1025 | 136.0378 | 2.0064 | 5.5E+04 | 1 | 1 | <a href="#">2</a> |
| 3762 | 22.77 | 352.0980 | 354.1041 | 236.0793 | 2.0062 | 1.1E+04 | 2 | 2 | <a href="#">1</a> |
| 3770 | 22.78 | 330.0904 | 332.0946 | 192.0642 | 2.0042 | 7.3E+03 | 2 | 2 | <a href="#">1</a> |
| 3771 | 22.79 | 382.1102 | 384.1159 | 148.0519 | 2.0057 | 1.0E+04 | 1 | 1 | <a href="#">2</a> |
| 3785 | 22.83 | 598.0997 | 600.1057 | 364.0414 | 2.0059 | 7.0E+03 | 1 | 1 | <a href="#">1</a> |
| 3790 | 22.89 | 741.3892 | 743.3956 | 507.3309 | 2.0064 | 1.3E+04 | 1 | 1 | <a href="#">2</a> |
| 3802 | 23.03 | 370.0975 | 372.1030 | 136.0392 | 2.0055 | 1.4E+04 | 1 | 1 | <a href="#">1</a> |
| 3807 | 23.04 | 310.0747 | 312.0824 | 76.0163  | 2.0077 | 7.8E+03 | 1 | 1 | <a href="#">1</a> |
| 3814 | 23.06 | 620.1738 | 624.1877 | 153.0644 | 4.0139 | 9.1E+03 | 1 | 2 | <a href="#">1</a> |
| 3815 | 23.06 | 741.3917 | 743.3995 | 507.3334 | 2.0079 | 8.8E+03 | 1 | 1 | <a href="#">2</a> |
| 3820 | 23.07 | 735.1909 | 739.2075 | 268.0816 | 4.0165 | 7.7E+03 | 1 | 2 | <a href="#">3</a> |
| 3821 | 23.07 | 578.1891 | 582.2022 | 111.0798 | 4.0131 | 1.1E+05 | 1 | 2 | <a href="#">1</a> |
| 3828 | 23.10 | 636.1943 | 640.2073 | 169.0850 | 4.0130 | 1.7E+04 | 1 | 2 | <a href="#">2</a> |
| 3832 | 23.11 | 403.1433 | 405.1496 | 169.0850 | 2.0063 | 1.0E+04 | 1 | 1 | <a href="#">2</a> |
| 3840 | 23.11 | 318.5950 | 320.6019 | 169.0734 | 2.0069 | 7.1E+03 | 2 | 2 | <a href="#">4</a> |
| 3841 | 23.11 | 325.5961 | 327.6026 | 183.0756 | 2.0065 | 2.0E+05 | 2 | 2 | <a href="#">1</a> |
| 3843 | 23.12 | 559.1567 | 563.1697 | 92.0473  | 4.0130 | 7.9E+03 | 1 | 2 | <a href="#">1</a> |
| 3859 | 23.15 | 715.3764 | 717.3801 | 481.3181 | 2.0037 | 7.1E+03 | 1 | 1 | <a href="#">3</a> |
| 3865 | 23.17 | 289.5981 | 291.6046 | 111.0795 | 2.0066 | 2.6E+05 | 2 | 2 | <a href="#">1</a> |
| 3899 | 23.32 | 741.3901 | 743.3973 | 507.3317 | 2.0073 | 9.0E+03 | 1 | 1 | <a href="#">2</a> |
| 3902 | 23.33 | 422.1745 | 424.1806 | 188.1162 | 2.0061 | 6.6E+03 | 1 | 1 | <a href="#">3</a> |
| 3912 | 23.41 | 715.3743 | 717.3820 | 481.3160 | 2.0076 | 8.2E+03 | 1 | 1 | <a href="#">3</a> |
| 3919 | 23.43 | 699.3694 | 701.3801 | 465.3111 | 2.0107 | 7.4E+03 | 1 | 1 | <a href="#">2</a> |
| 3922 | 23.47 | 315.0844 | 317.0913 | 162.0522 | 2.0068 | 1.8E+04 | 2 | 2 | <a href="#">5</a> |
| 3927 | 23.47 | 741.3909 | 743.3972 | 507.3326 | 2.0063 | 2.4E+04 | 1 | 1 | <a href="#">2</a> |
| 3942 | 23.56 | 328.1003 | 330.1065 | 94.0420  | 2.0063 | 5.2E+04 | 1 | 1 | <a href="#">1</a> |
| 3943 | 23.56 | 715.3741 | 717.3820 | 481.3158 | 2.0078 | 7.7E+03 | 1 | 1 | <a href="#">3</a> |
| 3945 | 23.57 | 741.3909 | 743.3975 | 507.3326 | 2.0066 | 9.8E+03 | 1 | 1 | <a href="#">2</a> |
| 3966 | 23.80 | 325.6028 | 327.6103 | 183.0889 | 2.0075 | 1.1E+04 | 2 | 2 | <a href="#">3</a> |
| 3967 | 23.80 | 741.3886 | 743.3972 | 507.3302 | 2.0086 | 8.5E+03 | 1 | 1 | <a href="#">2</a> |
| 3971 | 23.85 | 366.1001 | 368.1068 | 132.0418 | 2.0067 | 1.1E+04 | 1 | 1 | <a href="#">7</a> |
| 3977 | 23.88 | 360.1123 | 362.1199 | 126.0540 | 2.0077 | 7.8E+03 | 1 | 1 | <a href="#">2</a> |
| 3997 | 24.01 | 687.3451 | 689.3504 | 453.2868 | 2.0053 | 1.4E+06 | 1 | 1 | <a href="#">2</a> |
| 4005 | 24.05 | 370.0969 | 372.1029 | 136.0386 | 2.0061 | 1.9E+04 | 1 | 1 | <a href="#">1</a> |
| 4025 | 24.16 | 741.3915 | 743.3984 | 507.3332 | 2.0069 | 9.1E+03 | 1 | 1 | <a href="#">2</a> |
| 4036 | 24.22 | 687.3439 | 689.3496 | 453.2855 | 2.0058 | 7.5E+05 | 1 | 1 | <a href="#">2</a> |
| 4043 | 24.26 | 715.3742 | 717.3797 | 481.3159 | 2.0055 | 7.1E+03 | 1 | 1 | <a href="#">3</a> |
| 4053 | 24.30 | 619.1561 | 623.1618 | 152.0467 | 4.0057 | 1.2E+04 | 1 | 2 | <a href="#">9</a> |
| 4056 | 24.31 | 310.0752 | 312.0815 | 152.0337 | 2.0063 | 3.8E+04 | 2 | 2 | <a href="#">3</a> |
| 4057 | 24.32 | 618.1589 | 622.1718 | 151.0495 | 4.0129 | 4.6E+04 | 1 | 2 | <a href="#">3</a> |



|      |       |          |          |          |        |         |   |   |                   |
|------|-------|----------|----------|----------|--------|---------|---|---|-------------------|
| 4058 | 24.32 | 385.1072 | 387.1137 | 151.0489 | 2.0065 | 7.2E+04 | 1 | 1 | <a href="#">3</a> |
| 4059 | 24.33 | 316.0923 | 318.0998 | 164.0680 | 2.0075 | 1.4E+04 | 2 | 2 | <a href="#">6</a> |
| 4070 | 24.46 | 741.3906 | 743.3948 | 507.3323 | 2.0042 | 1.3E+04 | 1 | 1 | <a href="#">2</a> |
| 4072 | 24.47 | 370.0967 | 372.1017 | 136.0383 | 2.0051 | 6.6E+03 | 1 | 1 | <a href="#">1</a> |
| 4078 | 24.51 | 384.1265 | 386.1332 | 150.0682 | 2.0068 | 9.5E+03 | 1 | 1 | <a href="#">6</a> |
| 4086 | 24.56 | 741.3909 | 743.3948 | 507.3326 | 2.0039 | 1.4E+04 | 1 | 1 | <a href="#">2</a> |
| 4090 | 24.61 | 292.1055 | 294.1119 | 116.0945 | 2.0064 | 7.9E+03 | 2 | 2 | <a href="#">1</a> |
| 4095 | 24.67 | 680.2517 | 682.2586 | 446.1934 | 2.0070 | 7.6E+03 | 1 | 1 | <a href="#">1</a> |
| 4120 | 24.76 | 985.3646 | 989.3855 | 518.2553 | 4.0209 | 1.2E+04 | 1 | 2 | <a href="#">1</a> |
| 4125 | 24.78 | 299.0715 | 301.0780 | 130.0264 | 2.0065 | 1.1E+04 | 2 | 2 | <a href="#">4</a> |
| 4126 | 24.79 | 741.3916 | 743.3977 | 507.3333 | 2.0061 | 1.3E+04 | 1 | 1 | <a href="#">2</a> |
| 4145 | 24.83 | 309.5830 | 311.5896 | 151.0495 | 2.0066 | 3.1E+05 | 2 | 2 | <a href="#">3</a> |
| 4154 | 24.88 | 342.1156 | 344.1223 | 108.0572 | 2.0068 | 8.1E+03 | 1 | 1 | <a href="#">4</a> |
| 4156 | 24.89 | 370.0963 | 372.1027 | 136.0380 | 2.0064 | 7.8E+04 | 1 | 1 | <a href="#">1</a> |
| 4158 | 24.89 | 302.0778 | 304.0844 | 136.0389 | 2.0066 | 6.1E+05 | 2 | 2 | <a href="#">1</a> |
| 4163 | 24.94 | 564.3343 | 566.3400 | 330.2759 | 2.0057 | 9.9E+03 | 1 | 1 | <a href="#">2</a> |
| 4165 | 24.96 | 741.3905 | 743.3964 | 507.3322 | 2.0059 | 9.3E+03 | 1 | 1 | <a href="#">2</a> |
| 4166 | 24.96 | 564.3356 | 566.3429 | 330.2773 | 2.0073 | 6.9E+03 | 1 | 1 | <a href="#">2</a> |
| 4167 | 24.97 | 354.1157 | 356.1225 | 120.0574 | 2.0068 | 9.8E+04 | 1 | 1 | <a href="#">2</a> |
| 4173 | 25.01 | 324.5956 | 326.6020 | 181.0745 | 2.0064 | 8.4E+03 | 2 | 2 | <a href="#">5</a> |
| 4174 | 25.01 | 338.5925 | 340.6000 | 209.0684 | 2.0075 | 5.7E+04 | 2 | 2 | <a href="#">1</a> |
| 4178 | 25.05 | 741.3905 | 743.3970 | 507.3322 | 2.0065 | 9.9E+03 | 1 | 1 | <a href="#">2</a> |
| 4179 | 25.05 | 297.0855 | 299.0922 | 126.0544 | 2.0067 | 9.5E+03 | 2 | 2 | <a href="#">2</a> |
| 4183 | 25.07 | 687.3434 | 689.3495 | 453.2851 | 2.0061 | 6.1E+05 | 1 | 1 | <a href="#">2</a> |
| 4184 | 25.08 | 345.6005 | 347.6066 | 223.0844 | 2.0060 | 7.1E+03 | 2 | 2 | <a href="#">1</a> |
| 4199 | 25.13 | 278.1025 | 280.1121 | 88.0884  | 2.0096 | 8.2E+03 | 2 | 2 | <a href="#">1</a> |
| 4205 | 25.15 | 354.1159 | 356.1224 | 120.0576 | 2.0065 | 3.8E+05 | 1 | 1 | <a href="#">2</a> |
| 4216 | 25.21 | 687.3440 | 689.3502 | 453.2857 | 2.0062 | 5.4E+05 | 1 | 1 | <a href="#">2</a> |
| 4219 | 25.25 | 741.3898 | 743.3945 | 507.3315 | 2.0047 | 7.2E+03 | 1 | 1 | <a href="#">2</a> |
| 4226 | 25.30 | 564.3340 | 566.3405 | 330.2757 | 2.0065 | 1.5E+04 | 1 | 1 | <a href="#">2</a> |
| 4236 | 25.37 | 356.1710 | 358.1780 | 244.2254 | 2.0069 | 1.1E+04 | 2 | 2 | <a href="#">1</a> |
| 4248 | 25.39 | 262.0533 | 264.0598 | 27.9950  | 2.0065 | 1.2E+04 | 1 | 1 | <a href="#">1</a> |
| 4253 | 25.39 | 358.6017 | 360.6082 | 249.0868 | 2.0065 | 4.9E+04 | 2 | 2 | <a href="#">2</a> |
| 4278 | 25.41 | 564.3356 | 566.3398 | 330.2773 | 2.0042 | 1.5E+04 | 1 | 1 | <a href="#">2</a> |
| 4287 | 25.42 | 687.3438 | 689.3505 | 453.2855 | 2.0066 | 2.5E+05 | 1 | 1 | <a href="#">2</a> |
| 4318 | 25.55 | 564.3340 | 566.3392 | 330.2757 | 2.0052 | 1.8E+04 | 1 | 1 | <a href="#">2</a> |
| 4323 | 25.58 | 375.0773 | 377.0837 | 141.0190 | 2.0064 | 1.2E+04 | 1 | 1 | <a href="#">1</a> |
| 4325 | 25.58 | 687.3442 | 689.3508 | 453.2859 | 2.0066 | 2.7E+05 | 1 | 1 | <a href="#">2</a> |
| 4329 | 25.61 | 373.1230 | 375.1277 | 278.1294 | 2.0047 | 8.8E+03 | 2 | 2 | <a href="#">1</a> |
| 4345 | 25.77 | 687.3430 | 689.3494 | 453.2847 | 2.0064 | 3.5E+05 | 1 | 1 | <a href="#">2</a> |
| 4353 | 25.82 | 735.3427 | 737.3477 | 501.2844 | 2.0050 | 1.7E+04 | 1 | 1 | <a href="#">4</a> |
| 4371 | 25.96 | 287.0792 | 289.0854 | 106.0417 | 2.0063 | 4.5E+04 | 2 | 2 | <a href="#">1</a> |
| 4379 | 25.99 | 713.3601 | 715.3649 | 479.3018 | 2.0047 | 4.8E+05 | 1 | 1 | <a href="#">4</a> |
| 4381 | 26.00 | 564.3356 | 566.3412 | 330.2773 | 2.0056 | 2.3E+04 | 1 | 1 | <a href="#">2</a> |
| 4382 | 26.01 | 375.0771 | 377.0829 | 141.0188 | 2.0058 | 1.4E+04 | 1 | 1 | <a href="#">1</a> |
| 4384 | 26.02 | 370.0961 | 372.1027 | 136.0378 | 2.0065 | 3.9E+04 | 1 | 1 | <a href="#">2</a> |
| 4407 | 26.10 | 603.1482 | 607.1612 | 136.0389 | 4.0130 | 1.4E+04 | 1 | 2 | <a href="#">1</a> |



|      |       |          |          |          |        |         |   |   |                   |
|------|-------|----------|----------|----------|--------|---------|---|---|-------------------|
| 4416 | 26.12 | 323.1137 | 325.1204 | 178.1108 | 2.0067 | 8.8E+03 | 2 | 2 | <a href="#">3</a> |
| 4419 | 26.14 | 805.3386 | 807.3426 | 571.2803 | 2.0040 | 1.2E+04 | 1 | 1 | <a href="#">1</a> |
| 4420 | 26.14 | 412.1578 | 414.1645 | 178.0995 | 2.0067 | 7.3E+03 | 1 | 1 | <a href="#">1</a> |
| 4427 | 26.15 | 687.3439 | 689.3505 | 453.2856 | 2.0066 | 2.1E+05 | 1 | 1 | <a href="#">2</a> |
| 4429 | 26.19 | 564.3345 | 566.3390 | 330.2762 | 2.0045 | 3.4E+04 | 1 | 1 | <a href="#">2</a> |
| 4436 | 26.26 | 735.3420 | 737.3468 | 501.2837 | 2.0048 | 2.7E+04 | 1 | 1 | <a href="#">4</a> |
| 4440 | 26.27 | 344.1065 | 346.1129 | 110.0482 | 2.0064 | 1.1E+05 | 1 | 1 | <a href="#">1</a> |
| 4442 | 26.28 | 564.3340 | 566.3397 | 330.2756 | 2.0058 | 2.0E+04 | 1 | 1 | <a href="#">2</a> |
| 4456 | 26.41 | 687.3431 | 689.3497 | 453.2848 | 2.0066 | 1.0E+05 | 1 | 1 | <a href="#">2</a> |
| 4457 | 26.41 | 713.3581 | 715.3644 | 479.2998 | 2.0062 | 5.9E+04 | 1 | 1 | <a href="#">4</a> |
| 4460 | 26.42 | 564.3350 | 566.3405 | 330.2766 | 2.0056 | 2.1E+04 | 1 | 1 | <a href="#">2</a> |
| 4471 | 26.52 | 347.0878 | 349.0948 | 226.0590 | 2.0070 | 1.0E+04 | 2 | 2 | <a href="#">1</a> |
| 4475 | 26.55 | 370.0963 | 372.1033 | 136.0379 | 2.0070 | 1.2E+04 | 1 | 1 | <a href="#">1</a> |
| 4481 | 26.56 | 302.0778 | 304.0844 | 136.0389 | 2.0067 | 1.9E+06 | 2 | 2 | <a href="#">1</a> |
| 4484 | 26.57 | 564.3357 | 566.3408 | 330.2774 | 2.0051 | 2.9E+04 | 1 | 1 | <a href="#">2</a> |
| 4488 | 26.58 | 713.3598 | 715.3654 | 479.3015 | 2.0057 | 3.8E+05 | 1 | 1 | <a href="#">4</a> |
| 4491 | 26.63 | 344.1064 | 346.1132 | 110.0480 | 2.0068 | 2.8E+04 | 1 | 1 | <a href="#">1</a> |
| 4510 | 26.69 | 564.3359 | 566.3407 | 330.2776 | 2.0048 | 2.6E+04 | 1 | 1 | <a href="#">2</a> |
| 4515 | 26.72 | 687.3437 | 689.3507 | 453.2854 | 2.0070 | 9.8E+04 | 1 | 1 | <a href="#">2</a> |
| 4538 | 26.84 | 713.3604 | 715.3654 | 479.3021 | 2.0050 | 1.1E+06 | 1 | 1 | <a href="#">4</a> |
| 4549 | 26.88 | 753.3891 | 755.3971 | 519.3308 | 2.0080 | 8.7E+03 | 1 | 1 | <a href="#">1</a> |
| 4564 | 26.91 | 385.1071 | 387.1139 | 151.0488 | 2.0068 | 1.7E+04 | 1 | 1 | <a href="#">3</a> |
| 4565 | 26.91 | 750.2004 | 754.2138 | 283.0911 | 4.0134 | 1.2E+04 | 1 | 2 | <a href="#">2</a> |
| 4567 | 26.91 | 300.0792 | 302.0843 | 132.0418 | 2.0051 | 2.0E+04 | 2 | 2 | <a href="#">7</a> |
| 4568 | 26.91 | 564.3350 | 566.3409 | 330.2767 | 2.0059 | 1.0E+04 | 1 | 1 | <a href="#">2</a> |
| 4583 | 26.99 | 599.1520 | 603.1638 | 132.0426 | 4.0118 | 1.1E+04 | 1 | 2 | <a href="#">7</a> |
| 4588 | 26.99 | 711.1787 | 715.1922 | 244.0693 | 4.0135 | 1.8E+04 | 1 | 2 | <a href="#">2</a> |
| 4589 | 26.99 | 460.1166 | 462.1228 | 226.0583 | 2.0062 | 2.3E+04 | 1 | 1 | <a href="#">1</a> |
| 4600 | 27.04 | 370.0972 | 372.1027 | 136.0388 | 2.0055 | 2.3E+04 | 1 | 1 | <a href="#">1</a> |
| 4601 | 27.05 | 300.0794 | 302.0854 | 132.0422 | 2.0060 | 3.9E+04 | 2 | 2 | <a href="#">7</a> |
| 4604 | 27.06 | 735.1907 | 739.2026 | 268.0813 | 4.0120 | 1.0E+04 | 1 | 2 | <a href="#">3</a> |
| 4626 | 27.12 | 687.3435 | 689.3501 | 453.2852 | 2.0066 | 1.1E+05 | 1 | 1 | <a href="#">2</a> |
| 4659 | 27.26 | 384.1622 | 386.1683 | 150.1039 | 2.0061 | 1.2E+04 | 1 | 1 | <a href="#">3</a> |
| 4661 | 27.27 | 323.6055 | 325.6122 | 179.0943 | 2.0068 | 1.8E+04 | 2 | 2 | <a href="#">2</a> |
| 4663 | 27.28 | 687.3437 | 689.3491 | 453.2854 | 2.0054 | 2.5E+04 | 1 | 1 | <a href="#">2</a> |
| 4689 | 27.40 | 384.1623 | 386.1688 | 150.1039 | 2.0065 | 7.5E+04 | 1 | 1 | <a href="#">3</a> |
| 4695 | 27.41 | 300.0797 | 302.0843 | 132.0428 | 2.0046 | 7.5E+03 | 2 | 2 | <a href="#">7</a> |
| 4702 | 27.44 | 687.3431 | 689.3496 | 453.2848 | 2.0065 | 3.0E+04 | 1 | 1 | <a href="#">2</a> |
| 4720 | 27.52 | 735.1904 | 739.2050 | 268.0811 | 4.0146 | 7.1E+03 | 1 | 2 | <a href="#">3</a> |
| 4736 | 27.57 | 687.3447 | 689.3526 | 453.2864 | 2.0079 | 1.6E+04 | 1 | 1 | <a href="#">2</a> |
| 4742 | 27.59 | 709.3263 | 711.3294 | 475.2680 | 2.0031 | 2.2E+04 | 1 | 1 | <a href="#">4</a> |
| 4758 | 27.61 | 370.0968 | 372.1033 | 136.0385 | 2.0065 | 3.3E+05 | 1 | 1 | <a href="#">1</a> |
| 4775 | 27.67 | 735.1908 | 739.2037 | 268.0814 | 4.0129 | 2.8E+05 | 1 | 2 | <a href="#">3</a> |
| 4785 | 27.71 | 687.3450 | 689.3506 | 453.2867 | 2.0056 | 2.9E+04 | 1 | 1 | <a href="#">2</a> |
| 4822 | 27.79 | 713.3602 | 715.3655 | 479.3019 | 2.0053 | 1.3E+06 | 1 | 1 | <a href="#">4</a> |
| 4858 | 27.91 | 729.3894 | 731.3960 | 495.3311 | 2.0066 | 3.2E+04 | 1 | 1 | <a href="#">1</a> |
| 4860 | 27.95 | 687.3452 | 689.3510 | 453.2869 | 2.0058 | 1.2E+04 | 1 | 1 | <a href="#">2</a> |

|      |       |          |          |          |        |         |   |   |                    |
|------|-------|----------|----------|----------|--------|---------|---|---|--------------------|
| 4871 | 28.08 | 729.3892 | 731.3955 | 495.3308 | 2.0064 | 6.4E+04 | 1 | 1 | <a href="#">1</a>  |
| 4873 | 28.11 | 687.3443 | 689.3507 | 453.2860 | 2.0063 | 1.8E+04 | 1 | 1 | <a href="#">2</a>  |
| 4878 | 28.14 | 603.1621 | 607.1741 | 136.0528 | 4.0120 | 1.2E+05 | 1 | 2 | <a href="#">1</a>  |
| 4881 | 28.16 | 370.0975 | 372.1029 | 136.0391 | 2.0054 | 7.9E+04 | 1 | 1 | <a href="#">1</a>  |
| 4886 | 28.17 | 735.1897 | 739.2027 | 268.0804 | 4.0130 | 6.3E+04 | 1 | 2 | <a href="#">4</a>  |
| 4896 | 28.25 | 599.1512 | 603.1624 | 132.0418 | 4.0112 | 2.3E+04 | 1 | 2 | <a href="#">7</a>  |
| 4900 | 28.26 | 687.3439 | 689.3498 | 453.2856 | 2.0059 | 2.8E+04 | 1 | 1 | <a href="#">2</a>  |
| 4912 | 28.29 | 735.1876 | 739.2009 | 268.0782 | 4.0134 | 5.6E+04 | 1 | 2 | <a href="#">1</a>  |
| 4919 | 28.48 | 652.3076 | 654.3143 | 418.2493 | 2.0067 | 2.5E+04 | 1 | 1 | <a href="#">2</a>  |
| 4930 | 28.60 | 729.3901 | 731.3962 | 495.3318 | 2.0061 | 1.0E+05 | 1 | 1 | <a href="#">1</a>  |
| 4935 | 28.64 | 687.3440 | 689.3496 | 453.2857 | 2.0055 | 2.5E+04 | 1 | 1 | <a href="#">2</a>  |
| 4938 | 28.66 | 755.4057 | 757.4120 | 521.3473 | 2.0063 | 2.1E+04 | 1 | 1 | <a href="#">2</a>  |
| 4943 | 28.69 | 713.3597 | 715.3653 | 479.3014 | 2.0056 | 8.3E+05 | 1 | 1 | <a href="#">4</a>  |
| 4952 | 28.75 | 797.3171 | 799.3188 | 563.2588 | 2.0017 | 1.4E+04 | 1 | 1 | <a href="#">1</a>  |
| 4955 | 28.76 | 751.3729 | 753.3769 | 517.3145 | 2.0041 | 8.1E+03 | 1 | 1 | <a href="#">2</a>  |
| 4958 | 28.81 | 305.0952 | 307.1044 | 71.0369  | 2.0092 | 1.4E+04 | 1 | 1 | <a href="#">1</a>  |
| 4959 | 28.81 | 687.3441 | 689.3498 | 453.2857 | 2.0058 | 1.3E+04 | 1 | 1 | <a href="#">2</a>  |
| 4968 | 28.86 | 713.3596 | 715.3653 | 479.3013 | 2.0058 | 6.8E+05 | 1 | 1 | <a href="#">4</a>  |
| 4976 | 28.91 | 570.2897 | 572.2928 | 336.2314 | 2.0031 | 1.1E+04 | 1 | 1 | <a href="#">22</a> |
| 4996 | 28.98 | 713.3596 | 715.3657 | 479.3013 | 2.0061 | 3.6E+05 | 1 | 1 | <a href="#">4</a>  |
| 4998 | 28.98 | 687.3442 | 689.3500 | 453.2859 | 2.0058 | 1.5E+04 | 1 | 1 | <a href="#">2</a>  |
| 5017 | 29.05 | 755.4057 | 757.4112 | 521.3474 | 2.0055 | 4.7E+04 | 1 | 1 | <a href="#">2</a>  |
| 5079 | 29.24 | 403.0625 | 405.0659 | 169.0042 | 2.0033 | 5.0E+04 | 1 | 1 | <a href="#">1</a>  |
| 5080 | 29.24 | 713.3598 | 715.3659 | 479.3015 | 2.0061 | 2.0E+05 | 1 | 1 | <a href="#">4</a>  |
| 5084 | 29.25 | 755.4060 | 757.4128 | 521.3477 | 2.0068 | 1.1E+04 | 1 | 1 | <a href="#">2</a>  |
| 5086 | 29.27 | 763.3728 | 765.3813 | 529.3145 | 2.0085 | 6.4E+03 | 1 | 1 | <a href="#">2</a>  |
| 5094 | 29.31 | 687.3430 | 689.3493 | 453.2847 | 2.0063 | 1.7E+04 | 1 | 1 | <a href="#">2</a>  |
| 5107 | 29.36 | 584.3052 | 586.3090 | 350.2469 | 2.0039 | 1.3E+04 | 1 | 1 | <a href="#">5</a>  |
| 5110 | 29.37 | 713.3595 | 715.3652 | 479.3012 | 2.0057 | 6.2E+05 | 1 | 1 | <a href="#">4</a>  |
| 5134 | 29.51 | 687.3451 | 689.3502 | 453.2868 | 2.0051 | 1.4E+04 | 1 | 1 | <a href="#">2</a>  |
| 5137 | 29.56 | 713.3597 | 715.3655 | 479.3014 | 2.0057 | 6.3E+05 | 1 | 1 | <a href="#">4</a>  |
| 5144 | 29.60 | 735.3421 | 737.3479 | 501.2838 | 2.0058 | 7.6E+03 | 1 | 1 | <a href="#">4</a>  |
| 5155 | 29.68 | 713.3588 | 715.3650 | 479.3005 | 2.0062 | 2.3E+05 | 1 | 1 | <a href="#">4</a>  |
| 5156 | 29.69 | 755.4072 | 757.4137 | 521.3489 | 2.0065 | 2.9E+04 | 1 | 1 | <a href="#">2</a>  |
| 5160 | 29.71 | 687.3446 | 689.3502 | 453.2862 | 2.0056 | 1.5E+04 | 1 | 1 | <a href="#">2</a>  |
| 5176 | 29.80 | 755.4062 | 757.4134 | 521.3479 | 2.0072 | 2.4E+04 | 1 | 1 | <a href="#">2</a>  |
| 5195 | 29.83 | 733.3305 | 735.3397 | 499.2722 | 2.0092 | 1.2E+04 | 1 | 1 | <a href="#">2</a>  |
| 5239 | 29.93 | 549.2991 | 551.3051 | 315.2408 | 2.0060 | 9.5E+03 | 1 | 1 | <a href="#">1</a>  |
| 5250 | 29.99 | 682.2661 | 684.2704 | 448.2078 | 2.0043 | 8.5E+03 | 1 | 1 | <a href="#">5</a>  |
| 5254 | 30.01 | 713.3598 | 715.3658 | 479.3014 | 2.0060 | 3.5E+05 | 1 | 1 | <a href="#">4</a>  |
| 5256 | 30.02 | 687.3441 | 689.3502 | 453.2858 | 2.0061 | 1.5E+04 | 1 | 1 | <a href="#">2</a>  |
| 5283 | 30.12 | 687.3447 | 689.3499 | 453.2863 | 2.0052 | 1.3E+04 | 1 | 1 | <a href="#">2</a>  |
| 5305 | 30.22 | 687.3459 | 689.3504 | 453.2876 | 2.0045 | 9.1E+03 | 1 | 1 | <a href="#">2</a>  |
| 5311 | 30.26 | 713.3591 | 715.3649 | 479.3007 | 2.0059 | 3.8E+05 | 1 | 1 | <a href="#">4</a>  |
| 5325 | 30.31 | 687.3438 | 689.3513 | 453.2855 | 2.0074 | 8.1E+03 | 1 | 1 | <a href="#">2</a>  |
| 5334 | 30.35 | 317.1077 | 319.1146 | 166.0987 | 2.0069 | 7.3E+03 | 2 | 2 | <a href="#">1</a>  |
| 5348 | 30.53 | 687.3442 | 689.3499 | 453.2859 | 2.0057 | 6.6E+03 | 1 | 1 | <a href="#">2</a>  |

|      |       |          |          |          |        |         |   |   |                   |
|------|-------|----------|----------|----------|--------|---------|---|---|-------------------|
| 5378 | 30.83 | 713.3593 | 715.3652 | 479.3010 | 2.0058 | 3.0E+05 | 1 | 1 | <a href="#">4</a> |
| 5403 | 31.07 | 595.3196 | 597.3252 | 361.2613 | 2.0056 | 7.8E+03 | 1 | 1 | <a href="#">1</a> |
| 5411 | 31.25 | 659.3115 | 661.3157 | 425.2532 | 2.0042 | 8.1E+03 | 1 | 1 | <a href="#">2</a> |
| 5444 | 31.57 | 713.3595 | 715.3659 | 479.3012 | 2.0064 | 1.6E+05 | 1 | 1 | <a href="#">4</a> |
| 5457 | 31.66 | 370.0958 | 372.1011 | 136.0375 | 2.0054 | 1.3E+04 | 1 | 1 | <a href="#">2</a> |

Supplemental Table T3. Metabolites putatively identified using accurate mass search against the predicted human m

| feature ID | rt (min) | mz_light | mz_heavy | Monoisotopic<br>molecular mass | distance | int_heavy | nCharge | nTag | Matches            |
|------------|----------|----------|----------|--------------------------------|----------|-----------|---------|------|--------------------|
| 3          | 1.72     | 778.1809 | 780.1876 | 544.1226                       | 2.0067   | 3.8E+04   | 1       | 1    | <a href="#">2</a>  |
| 6          | 1.84     | 585.2889 | 587.2900 | 351.2306                       | 2.0011   | 3.9E+04   | 1       | 1    | <a href="#">1</a>  |
| 7          | 1.85     | 804.1741 | 806.1754 | 570.1158                       | 2.0013   | 2.3E+04   | 1       | 1    | <a href="#">1</a>  |
| 8          | 1.85     | 357.0671 | 359.0732 | 123.0088                       | 2.0061   | 2.2E+04   | 1       | 1    | <a href="#">2</a>  |
| 10         | 1.89     | 549.1002 | 551.1069 | 315.0419                       | 2.0066   | 3.0E+04   | 1       | 1    | <a href="#">3</a>  |
| 11         | 1.90     | 782.1922 | 784.1942 | 548.1338                       | 2.0021   | 2.9E+04   | 1       | 1    | <a href="#">1</a>  |
| 12         | 1.90     | 493.0774 | 495.0831 | 259.0191                       | 2.0056   | 1.3E+04   | 1       | 1    | <a href="#">2</a>  |
| 15         | 1.93     | 629.3149 | 631.3163 | 395.2566                       | 2.0015   | 2.5E+04   | 1       | 1    | <a href="#">2</a>  |
| 19         | 1.99     | 573.1306 | 575.1383 | 339.0723                       | 2.0076   | 2.3E+04   | 1       | 1    | <a href="#">4</a>  |
| 20         | 2.00     | 589.1277 | 591.1322 | 355.0694                       | 2.0046   | 9.6E+03   | 1       | 1    | <a href="#">5</a>  |
| 21         | 2.01     | 575.1385 | 577.1414 | 341.0802                       | 2.0029   | 1.3E+04   | 1       | 1    | <a href="#">4</a>  |
| 22         | 2.02     | 387.0676 | 389.0740 | 153.0093                       | 2.0064   | 1.1E+04   | 1       | 1    | <a href="#">8</a>  |
| 24         | 2.02     | 778.1803 | 780.1870 | 544.1220                       | 2.0066   | 2.2E+04   | 1       | 1    | <a href="#">2</a>  |
| 27         | 2.04     | 717.3671 | 719.3694 | 483.3088                       | 2.0023   | 4.4E+04   | 1       | 1    | <a href="#">4</a>  |
| 29         | 2.09     | 630.1514 | 632.1531 | 396.0931                       | 2.0017   | 1.9E+04   | 1       | 1    | <a href="#">3</a>  |
| 30         | 2.10     | 652.1337 | 654.1440 | 418.0754                       | 2.0103   | 1.1E+04   | 1       | 1    | <a href="#">2</a>  |
| 31         | 2.10     | 881.2130 | 883.2216 | 647.1546                       | 2.0086   | 8.7E+03   | 1       | 1    | <a href="#">4</a>  |
| 33         | 2.10     | 782.1928 | 784.1931 | 548.1345                       | 2.0003   | 1.3E+04   | 1       | 1    | <a href="#">1</a>  |
| 34         | 2.11     | 628.1451 | 630.1518 | 394.0867                       | 2.0067   | 1.9E+04   | 1       | 1    | <a href="#">10</a> |
| 35         | 2.11     | 419.0408 | 421.0475 | 184.9825                       | 2.0067   | 1.3E+04   | 1       | 1    | <a href="#">2</a>  |
| 36         | 2.11     | 903.1953 | 905.2042 | 669.1370                       | 2.0089   | 8.4E+03   | 1       | 1    | <a href="#">2</a>  |
| 38         | 2.12     | 672.1102 | 674.1159 | 438.0519                       | 2.0058   | 7.3E+03   | 1       | 1    | <a href="#">2</a>  |
| 40         | 2.12     | 650.1275 | 652.1349 | 416.0692                       | 2.0074   | 1.1E+04   | 1       | 1    | <a href="#">2</a>  |
| 42         | 2.14     | 474.1433 | 476.1500 | 240.0850                       | 2.0067   | 9.2E+03   | 1       | 1    | <a href="#">25</a> |
| 43         | 2.14     | 879.2079 | 881.2147 | 645.1496                       | 2.0068   | 1.3E+04   | 1       | 1    | <a href="#">1</a>  |
| 45         | 2.16     | 667.1905 | 669.1959 | 433.1321                       | 2.0055   | 6.3E+03   | 1       | 1    | <a href="#">9</a>  |
| 54         | 2.26     | 805.4190 | 807.4211 | 571.3607                       | 2.0022   | 1.4E+04   | 1       | 1    | <a href="#">1</a>  |
| 56         | 2.27     | 595.1364 | 597.1424 | 361.0781                       | 2.0060   | 1.0E+04   | 1       | 1    | <a href="#">17</a> |
| 60         | 2.33     | 761.3941 | 763.3951 | 527.3358                       | 2.0010   | 1.5E+04   | 1       | 1    | <a href="#">10</a> |
| 61         | 2.33     | 389.1819 | 391.1928 | 310.2471                       | 2.0109   | 6.5E+03   | 2       | 2    | <a href="#">1</a>  |
| 63         | 2.36     | 389.0918 | 391.0983 | 155.0334                       | 2.0065   | 1.4E+04   | 1       | 1    | <a href="#">4</a>  |
| 64         | 2.36     | 565.1300 | 567.1335 | 331.0717                       | 2.0036   | 1.6E+04   | 1       | 1    | <a href="#">4</a>  |
| 65         | 2.37     | 543.1487 | 545.1479 | 309.0904                       | 1.9991   | 3.8E+04   | 1       | 1    | <a href="#">1</a>  |
| 68         | 2.39     | 645.0878 | 647.0868 | 411.0294                       | 1.9990   | 2.2E+04   | 1       | 1    | <a href="#">1</a>  |
| 74         | 2.43     | 573.1304 | 575.1385 | 339.0721                       | 2.0081   | 6.9E+03   | 1       | 1    | <a href="#">4</a>  |
| 75         | 2.45     | 403.0356 | 405.0423 | 168.9772                       | 2.0068   | 2.0E+04   | 1       | 1    | <a href="#">1</a>  |
| 83         | 2.51     | 759.3982 | 761.3973 | 525.3399                       | 1.9990   | 7.7E+03   | 1       | 1    | <a href="#">5</a>  |
| 86         | 2.53     | 803.4230 | 805.4201 | 569.3647                       | 1.9971   | 6.4E+03   | 1       | 1    | <a href="#">1</a>  |
| 90         | 2.58     | 641.1757 | 643.1802 | 407.1174                       | 2.0045   | 7.4E+03   | 1       | 1    | <a href="#">9</a>  |
| 93         | 2.59     | 388.1076 | 390.1137 | 154.0493                       | 2.0062   | 3.4E+05   | 1       | 1    | <a href="#">10</a> |
| 95         | 2.59     | 610.1322 | 612.1400 | 376.0739                       | 2.0077   | 8.1E+03   | 1       | 1    | <a href="#">1</a>  |
| 99         | 2.61     | 721.1499 | 723.1497 | 487.0916                       | 1.9997   | 6.2E+04   | 1       | 1    | <a href="#">1</a>  |
| 100        | 2.61     | 431.1029 | 433.1100 | 197.0445                       | 2.0071   | 1.2E+04   | 1       | 1    | <a href="#">12</a> |

|     |      |          |          |          |        |         |   |   |                    |
|-----|------|----------|----------|----------|--------|---------|---|---|--------------------|
| 101 | 2.62 | 748.1806 | 750.1844 | 514.1223 | 2.0038 | 1.1E+04 | 1 | 1 | <a href="#">5</a>  |
| 105 | 2.65 | 403.0356 | 405.0424 | 168.9773 | 2.0068 | 1.4E+04 | 1 | 1 | <a href="#">1</a>  |
| 109 | 2.70 | 719.1451 | 721.1512 | 485.0867 | 2.0062 | 1.8E+04 | 1 | 1 | <a href="#">2</a>  |
| 110 | 2.70 | 460.1638 | 462.1695 | 226.1054 | 2.0057 | 2.2E+04 | 1 | 1 | <a href="#">1</a>  |
| 125 | 2.87 | 667.1894 | 669.1976 | 433.1310 | 2.0082 | 7.8E+03 | 1 | 1 | <a href="#">4</a>  |
| 139 | 2.99 | 724.1908 | 726.1992 | 490.1325 | 2.0084 | 7.0E+03 | 1 | 1 | <a href="#">3</a>  |
| 147 | 3.02 | 470.1196 | 472.1220 | 236.0613 | 2.0024 | 1.8E+04 | 1 | 1 | <a href="#">3</a>  |
| 166 | 3.24 | 713.2567 | 715.2630 | 479.1984 | 2.0063 | 1.5E+04 | 1 | 1 | <a href="#">5</a>  |
| 172 | 3.29 | 711.2498 | 713.2557 | 477.1915 | 2.0058 | 8.8E+03 | 1 | 1 | <a href="#">4</a>  |
| 179 | 3.36 | 543.2734 | 545.2846 | 618.4301 | 2.0112 | 6.8E+03 | 2 | 2 | <a href="#">4</a>  |
| 180 | 3.36 | 535.1729 | 537.1784 | 301.1146 | 2.0054 | 7.6E+03 | 1 | 1 | <a href="#">1</a>  |
| 184 | 3.38 | 521.2618 | 523.2654 | 574.4070 | 2.0036 | 9.6E+03 | 2 | 2 | <a href="#">2</a>  |
| 189 | 3.41 | 347.0555 | 349.0631 | 225.9943 | 2.0076 | 8.7E+03 | 2 | 2 | <a href="#">2</a>  |
| 190 | 3.41 | 693.1028 | 697.1155 | 225.9935 | 4.0127 | 3.3E+04 | 1 | 2 | <a href="#">2</a>  |
| 191 | 3.41 | 693.1031 | 695.1040 | 459.0448 | 2.0008 | 4.8E+04 | 1 | 1 | <a href="#">1</a>  |
| 199 | 3.44 | 696.1121 | 698.1126 | 462.0538 | 2.0006 | 2.8E+04 | 1 | 1 | <a href="#">1</a>  |
| 206 | 3.51 | 514.3059 | 516.3106 | 560.4951 | 2.0048 | 2.0E+05 | 2 | 2 | <a href="#">4</a>  |
| 208 | 3.52 | 471.1428 | 473.1495 | 237.0845 | 2.0068 | 9.3E+03 | 1 | 1 | <a href="#">26</a> |
| 211 | 3.54 | 383.0699 | 385.0785 | 149.0116 | 2.0085 | 7.4E+03 | 1 | 1 | <a href="#">1</a>  |
| 216 | 3.59 | 633.1944 | 635.2004 | 399.1361 | 2.0060 | 8.2E+03 | 1 | 1 | <a href="#">20</a> |
| 225 | 3.62 | 514.3058 | 516.3093 | 560.4950 | 2.0035 | 1.7E+05 | 2 | 2 | <a href="#">4</a>  |
| 242 | 3.70 | 547.1493 | 549.1585 | 313.0910 | 2.0092 | 1.6E+04 | 1 | 1 | <a href="#">6</a>  |
| 243 | 3.71 | 547.1545 | 549.1599 | 313.0962 | 2.0055 | 4.1E+04 | 1 | 1 | <a href="#">1</a>  |
| 253 | 3.79 | 633.1942 | 635.2019 | 399.1358 | 2.0077 | 7.7E+03 | 1 | 1 | <a href="#">20</a> |
| 271 | 3.94 | 544.2767 | 546.2819 | 620.4367 | 2.0052 | 6.5E+03 | 2 | 2 | <a href="#">1</a>  |
| 280 | 4.03 | 699.3768 | 701.3922 | 465.3185 | 2.0154 | 7.3E+03 | 1 | 1 | <a href="#">3</a>  |
| 286 | 4.15 | 536.3186 | 538.3255 | 302.2603 | 2.0069 | 1.3E+05 | 1 | 1 | <a href="#">10</a> |
| 293 | 4.18 | 388.1073 | 390.1136 | 154.0490 | 2.0063 | 3.8E+04 | 1 | 1 | <a href="#">10</a> |
| 294 | 4.18 | 743.4024 | 745.4174 | 509.3440 | 2.0151 | 8.9E+03 | 1 | 1 | <a href="#">3</a>  |
| 305 | 4.26 | 780.3936 | 782.3997 | 546.3353 | 2.0061 | 2.7E+04 | 1 | 1 | <a href="#">2</a>  |
| 316 | 4.31 | 737.2035 | 739.2105 | 503.1452 | 2.0070 | 1.7E+04 | 1 | 1 | <a href="#">5</a>  |
| 322 | 4.33 | 802.4063 | 804.4132 | 568.3480 | 2.0068 | 1.6E+04 | 1 | 1 | <a href="#">3</a>  |
| 329 | 4.36 | 780.3935 | 782.3999 | 546.3352 | 2.0064 | 1.2E+04 | 1 | 1 | <a href="#">2</a>  |
| 335 | 4.37 | 566.2896 | 568.2946 | 664.4627 | 2.0050 | 8.1E+03 | 2 | 2 | <a href="#">1</a>  |
| 340 | 4.39 | 741.2144 | 743.2177 | 507.1561 | 2.0033 | 1.5E+04 | 1 | 1 | <a href="#">1</a>  |
| 354 | 4.46 | 802.4062 | 804.4130 | 568.3479 | 2.0068 | 1.1E+04 | 1 | 1 | <a href="#">3</a>  |
| 356 | 4.46 | 514.3061 | 516.3124 | 560.4955 | 2.0063 | 6.7E+03 | 2 | 2 | <a href="#">4</a>  |
| 357 | 4.46 | 737.2032 | 739.2092 | 503.1449 | 2.0059 | 1.1E+04 | 1 | 1 | <a href="#">5</a>  |
| 367 | 4.51 | 735.1977 | 737.2035 | 501.1394 | 2.0057 | 8.4E+03 | 1 | 1 | <a href="#">2</a>  |
| 384 | 4.65 | 562.3443 | 564.3594 | 656.5719 | 2.0151 | 2.4E+04 | 2 | 2 | <a href="#">45</a> |
| 386 | 4.67 | 580.3452 | 582.3507 | 692.5737 | 2.0055 | 5.2E+05 | 2 | 2 | <a href="#">4</a>  |
| 398 | 4.75 | 580.3454 | 582.3476 | 692.5742 | 2.0022 | 6.5E+05 | 2 | 2 | <a href="#">4</a>  |
| 401 | 4.77 | 553.1413 | 555.1473 | 319.0830 | 2.0060 | 1.4E+04 | 1 | 1 | <a href="#">4</a>  |
| 419 | 4.86 | 553.1420 | 555.1480 | 319.0836 | 2.0060 | 1.5E+04 | 1 | 1 | <a href="#">4</a>  |
| 422 | 4.86 | 580.3443 | 582.3511 | 346.2860 | 2.0068 | 2.8E+05 | 1 | 1 | <a href="#">15</a> |
| 425 | 4.89 | 602.3577 | 604.3614 | 736.5989 | 2.0036 | 7.6E+05 | 2 | 2 | <a href="#">8</a>  |
| 433 | 4.96 | 569.3138 | 571.3299 | 335.2555 | 2.0160 | 2.6E+04 | 1 | 1 | <a href="#">1</a>  |
| 441 | 4.99 | 610.3151 | 612.3201 | 752.5137 | 2.0050 | 1.9E+04 | 2 | 2 | <a href="#">37</a> |

|     |      |          |          |           |        |         |   |   |                    |
|-----|------|----------|----------|-----------|--------|---------|---|---|--------------------|
| 443 | 5.00 | 549.3179 | 551.3345 | 315.2596  | 2.0165 | 2.3E+04 | 1 | 1 | <a href="#">1</a>  |
| 446 | 5.01 | 631.3254 | 633.3417 | 397.2670  | 2.0164 | 2.3E+04 | 1 | 1 | <a href="#">1</a>  |
| 450 | 5.02 | 602.3584 | 604.3632 | 736.6001  | 2.0049 | 7.2E+05 | 2 | 2 | <a href="#">8</a>  |
| 477 | 5.17 | 653.3380 | 655.3484 | 419.2797  | 2.0104 | 1.1E+04 | 1 | 1 | <a href="#">1</a>  |
| 481 | 5.19 | 632.3283 | 634.3328 | 796.5400  | 2.0044 | 2.3E+04 | 2 | 2 | <a href="#">35</a> |
| 482 | 5.19 | 624.3711 | 626.3752 | 780.6256  | 2.0041 | 6.6E+05 | 2 | 2 | <a href="#">7</a>  |
| 491 | 5.29 | 654.3417 | 656.3465 | 840.5668  | 2.0047 | 2.3E+04 | 2 | 2 | <a href="#">21</a> |
| 500 | 5.37 | 654.3411 | 656.3458 | 840.5656  | 2.0047 | 2.5E+04 | 2 | 2 | <a href="#">21</a> |
| 510 | 5.41 | 749.2066 | 751.2144 | 515.1483  | 2.0077 | 1.6E+04 | 1 | 1 | <a href="#">2</a>  |
| 513 | 5.42 | 675.3512 | 677.3646 | 441.2928  | 2.0134 | 2.3E+04 | 1 | 1 | <a href="#">1</a>  |
| 517 | 5.44 | 676.3540 | 678.3594 | 884.5913  | 2.0054 | 2.9E+04 | 2 | 2 | <a href="#">44</a> |
| 522 | 5.49 | 668.3972 | 670.3999 | 868.6778  | 2.0026 | 5.8E+05 | 2 | 2 | <a href="#">5</a>  |
| 526 | 5.50 | 593.3609 | 595.3604 | 359.3026  | 1.9995 | 2.5E+04 | 1 | 1 | <a href="#">1</a>  |
| 527 | 5.50 | 549.3313 | 551.3337 | 315.2730  | 2.0024 | 2.0E+04 | 1 | 1 | <a href="#">1</a>  |
| 532 | 5.51 | 701.3922 | 703.4045 | 467.3339  | 2.0122 | 1.7E+04 | 1 | 1 | <a href="#">1</a>  |
| 540 | 5.54 | 668.3976 | 670.4033 | 868.6786  | 2.0057 | 4.8E+05 | 2 | 2 | <a href="#">6</a>  |
| 553 | 5.58 | 698.3676 | 700.3716 | 928.6187  | 2.0040 | 3.1E+04 | 2 | 2 | <a href="#">28</a> |
| 568 | 5.63 | 690.4103 | 692.4143 | 912.7039  | 2.0040 | 5.2E+05 | 2 | 2 | <a href="#">1</a>  |
| 584 | 5.68 | 637.3883 | 639.3908 | 403.3300  | 2.0025 | 2.9E+04 | 1 | 1 | <a href="#">1</a>  |
| 588 | 5.68 | 694.4245 | 696.4378 | 920.7323  | 2.0134 | 5.4E+04 | 2 | 2 | <a href="#">3</a>  |
| 591 | 5.70 | 720.3814 | 722.3856 | 972.6461  | 2.0042 | 2.9E+04 | 2 | 2 | <a href="#">1</a>  |
| 594 | 5.71 | 712.4232 | 714.4263 | 956.7298  | 2.0031 | 4.6E+05 | 2 | 2 | <a href="#">1</a>  |
| 607 | 5.75 | 492.1805 | 494.1858 | 258.1221  | 2.0053 | 6.1E+03 | 1 | 1 | <a href="#">8</a>  |
| 614 | 5.78 | 529.3210 | 531.3317 | 295.2627  | 2.0107 | 3.1E+04 | 1 | 1 | <a href="#">1</a>  |
| 615 | 5.78 | 593.3606 | 595.3626 | 359.3023  | 2.0020 | 2.5E+04 | 1 | 1 | <a href="#">1</a>  |
| 616 | 5.79 | 637.3884 | 639.3891 | 403.3301  | 2.0007 | 3.5E+04 | 1 | 1 | <a href="#">1</a>  |
| 626 | 5.82 | 742.3947 | 744.3983 | 1016.6727 | 2.0036 | 2.7E+04 | 2 | 2 | <a href="#">14</a> |
| 634 | 5.85 | 738.4503 | 740.4641 | 1008.7840 | 2.0138 | 2.2E+04 | 2 | 2 | <a href="#">5</a>  |
| 638 | 5.85 | 513.2791 | 515.2807 | 279.2207  | 2.0016 | 8.8E+03 | 1 | 1 | <a href="#">6</a>  |
| 640 | 5.86 | 701.3975 | 703.4092 | 467.3392  | 2.0118 | 1.2E+04 | 1 | 1 | <a href="#">1</a>  |
| 647 | 5.88 | 764.4073 | 766.4101 | 1060.6979 | 2.0028 | 3.6E+04 | 2 | 2 | <a href="#">27</a> |
| 651 | 5.90 | 509.2704 | 511.2738 | 275.2121  | 2.0034 | 7.7E+04 | 1 | 1 | <a href="#">1</a>  |
| 654 | 5.91 | 362.1644 | 364.1708 | 128.1061  | 2.0064 | 2.0E+04 | 1 | 1 | <a href="#">2</a>  |
| 657 | 5.92 | 764.9095 | 766.9136 | 1061.7023 | 2.0041 | 1.5E+04 | 2 | 2 | <a href="#">19</a> |
| 670 | 5.94 | 756.4492 | 758.4508 | 1044.7818 | 2.0015 | 3.1E+05 | 2 | 2 | <a href="#">4</a>  |
| 675 | 5.97 | 937.0201 | 939.0358 | 1405.9235 | 2.0157 | 1.6E+04 | 2 | 2 | <a href="#">1</a>  |
| 676 | 5.97 | 778.4618 | 780.4675 | 1088.8070 | 2.0056 | 2.7E+05 | 2 | 2 | <a href="#">3</a>  |
| 678 | 5.98 | 786.4215 | 788.4246 | 1104.7264 | 2.0031 | 2.0E+04 | 2 | 2 | <a href="#">17</a> |
| 692 | 6.07 | 808.4342 | 810.4403 | 1148.7518 | 2.0061 | 2.9E+04 | 2 | 2 | <a href="#">2</a>  |
| 696 | 6.08 | 337.1585 | 339.1651 | 103.1002  | 2.0066 | 5.3E+05 | 1 | 1 | <a href="#">5</a>  |
| 701 | 6.11 | 800.4760 | 802.4825 | 566.4177  | 2.0065 | 2.2E+05 | 1 | 1 | <a href="#">1</a>  |
| 705 | 6.13 | 830.4483 | 832.4510 | 1192.7799 | 2.0027 | 2.6E+04 | 2 | 2 | <a href="#">5</a>  |
| 712 | 6.16 | 553.2965 | 555.3000 | 319.2382  | 2.0034 | 5.9E+04 | 1 | 1 | <a href="#">1</a>  |
| 713 | 6.16 | 548.3264 | 550.3312 | 314.2681  | 2.0048 | 1.8E+05 | 1 | 1 | <a href="#">1</a>  |
| 722 | 6.21 | 563.3354 | 565.3422 | 658.5541  | 2.0068 | 1.4E+05 | 2 | 2 | <a href="#">43</a> |
| 747 | 6.29 | 560.3395 | 562.3499 | 652.5623  | 2.0104 | 3.9E+04 | 2 | 2 | <a href="#">12</a> |
| 760 | 6.31 | 874.4753 | 876.4795 | 1280.8339 | 2.0043 | 2.4E+04 | 2 | 2 | <a href="#">6</a>  |
| 774 | 6.34 | 896.4889 | 898.4898 | 662.4306  | 2.0009 | 2.5E+04 | 1 | 1 | <a href="#">1</a>  |

|      |      |          |          |           |        |         |   |   |           |
|------|------|----------|----------|-----------|--------|---------|---|---|-----------|
| 775  | 6.34 | 593.3550 | 595.3578 | 718.5933  | 2.0028 | 4.6E+04 | 2 | 2 | <u>2</u>  |
| 839  | 6.41 | 918.5021 | 920.5087 | 1368.8877 | 2.0066 | 2.4E+04 | 2 | 2 | <u>3</u>  |
| 846  | 6.42 | 593.3532 | 595.3632 | 718.5898  | 2.0100 | 2.3E+04 | 2 | 2 | <u>9</u>  |
| 874  | 6.46 | 613.0373 | 615.0429 | 378.9789  | 2.0057 | 4.0E+04 | 1 | 1 | <u>1</u>  |
| 876  | 6.46 | 941.0218 | 943.0215 | 1413.9269 | 1.9997 | 7.7E+03 | 2 | 2 | <u>4</u>  |
| 897  | 6.48 | 940.5148 | 942.5179 | 1412.9130 | 2.0031 | 2.2E+04 | 2 | 2 | <u>4</u>  |
| 916  | 6.50 | 932.5559 | 934.5579 | 698.4975  | 2.0021 | 3.1E+05 | 1 | 1 | <u>2</u>  |
| 929  | 6.51 | 618.3781 | 620.3859 | 768.6396  | 2.0077 | 7.3E+03 | 2 | 2 | <u>3</u>  |
| 933  | 6.52 | 622.0374 | 624.0429 | 387.9790  | 2.0055 | 1.6E+05 | 1 | 1 | <u>1</u>  |
| 943  | 6.53 | 334.1222 | 336.1287 | 100.0639  | 2.0064 | 1.6E+05 | 1 | 1 | <u>3</u>  |
| 955  | 6.54 | 641.3491 | 643.3532 | 814.5816  | 2.0041 | 4.3E+04 | 2 | 2 | <u>18</u> |
| 959  | 6.54 | 962.5279 | 964.5318 | 728.4696  | 2.0039 | 2.1E+04 | 1 | 1 | <u>1</u>  |
| 963  | 6.54 | 638.0335 | 642.0523 | 170.9242  | 4.0188 | 1.8E+05 | 1 | 2 | <u>1</u>  |
| 974  | 6.56 | 954.5680 | 956.5649 | 720.5097  | 1.9969 | 2.1E+05 | 1 | 1 | <u>16</u> |
| 976  | 6.56 | 616.0285 | 618.0391 | 381.9702  | 2.0106 | 2.8E+04 | 1 | 1 | <u>1</u>  |
| 984  | 6.56 | 954.5687 | 956.5722 | 720.5104  | 2.0035 | 2.9E+05 | 1 | 1 | <u>17</u> |
| 1006 | 6.58 | 667.3817 | 669.3947 | 433.3234  | 2.0130 | 1.1E+04 | 1 | 1 | <u>2</u>  |
| 1010 | 6.59 | 495.2765 | 497.2795 | 261.2181  | 2.0030 | 1.5E+04 | 1 | 1 | <u>1</u>  |
| 1013 | 6.59 | 660.0333 | 662.0351 | 425.9750  | 2.0018 | 4.1E+04 | 1 | 1 | <u>1</u>  |
| 1020 | 6.59 | 984.5423 | 986.5459 | 750.4839  | 2.0036 | 1.4E+04 | 1 | 1 | <u>11</u> |
| 1057 | 6.63 | 627.3821 | 629.3857 | 786.6476  | 2.0035 | 2.2E+04 | 2 | 2 | <u>12</u> |
| 1061 | 6.63 | 703.4121 | 705.4254 | 469.3538  | 2.0133 | 6.8E+03 | 1 | 1 | <u>3</u>  |
| 1062 | 6.63 | 495.2895 | 497.2999 | 261.2311  | 2.0105 | 3.6E+04 | 1 | 1 | <u>2</u>  |
| 1081 | 6.66 | 976.5822 | 978.5846 | 742.5239  | 2.0024 | 1.5E+05 | 1 | 1 | <u>28</u> |
| 1083 | 6.66 | 657.0639 | 659.0701 | 423.0056  | 2.0062 | 4.9E+04 | 1 | 1 | <u>1</u>  |
| 1086 | 6.67 | 508.0597 | 510.0646 | 274.0013  | 2.0050 | 1.7E+04 | 1 | 1 | <u>2</u>  |
| 1125 | 6.78 | 695.0798 | 697.0835 | 461.0215  | 2.0037 | 1.7E+05 | 1 | 1 | <u>1</u>  |
| 1126 | 6.78 | 701.0896 | 703.0930 | 467.0313  | 2.0034 | 8.1E+04 | 1 | 1 | <u>1</u>  |
| 1130 | 6.78 | 671.4079 | 673.4116 | 874.6991  | 2.0038 | 1.8E+04 | 2 | 2 | <u>1</u>  |
| 1131 | 6.78 | 627.3808 | 629.3848 | 786.6450  | 2.0040 | 1.5E+04 | 2 | 2 | <u>12</u> |
| 1136 | 6.79 | 530.0732 | 532.0729 | 296.0149  | 1.9996 | 2.3E+04 | 1 | 1 | <u>2</u>  |
| 1143 | 6.79 | 681.4018 | 683.4137 | 894.6870  | 2.0118 | 1.4E+04 | 2 | 2 | <u>8</u>  |
| 1148 | 6.80 | 735.4104 | 737.4138 | 1002.7042 | 2.0034 | 1.0E+04 | 2 | 2 | <u>24</u> |
| 1149 | 6.81 | 637.3747 | 639.3860 | 806.6328  | 2.0113 | 1.1E+04 | 2 | 2 | <u>2</u>  |
| 1159 | 6.82 | 733.4110 | 735.4138 | 499.3527  | 2.0028 | 5.7E+04 | 1 | 1 | <u>6</u>  |
| 1165 | 6.83 | 556.0574 | 558.0611 | 643.9981  | 2.0037 | 2.1E+04 | 2 | 2 | <u>1</u>  |
| 1167 | 6.83 | 541.0804 | 543.0779 | 307.0220  | 1.9975 | 4.6E+04 | 1 | 1 | <u>2</u>  |
| 1193 | 6.85 | 734.4298 | 736.4427 | 500.3715  | 2.0129 | 1.7E+04 | 1 | 1 | <u>2</u>  |
| 1198 | 6.86 | 733.4236 | 735.4228 | 499.3653  | 1.9992 | 4.5E+04 | 1 | 1 | <u>5</u>  |
| 1205 | 6.87 | 552.0875 | 554.0832 | 636.0584  | 1.9957 | 5.8E+04 | 2 | 2 | <u>1</u>  |
| 1206 | 6.87 | 552.0864 | 554.0870 | 318.0280  | 2.0006 | 3.8E+04 | 1 | 1 | <u>5</u>  |
| 1227 | 6.89 | 527.3148 | 529.3205 | 586.5129  | 2.0057 | 6.3E+03 | 2 | 2 | <u>1</u>  |
| 1229 | 6.89 | 748.4218 | 750.4329 | 514.3635  | 2.0111 | 3.5E+04 | 1 | 1 | <u>8</u>  |
| 1232 | 6.90 | 560.0789 | 562.0816 | 326.0206  | 2.0027 | 9.4E+04 | 1 | 1 | <u>1</u>  |
| 1233 | 6.90 | 811.4902 | 813.4947 | 577.4319  | 2.0045 | 2.9E+04 | 1 | 1 | <u>2</u>  |
| 1243 | 6.90 | 763.0947 | 767.1041 | 295.9854  | 4.0093 | 1.6E+04 | 1 | 2 | <u>1</u>  |
| 1250 | 6.91 | 730.1073 | 732.1085 | 496.0490  | 2.0012 | 2.6E+04 | 1 | 1 | <u>1</u>  |
| 1253 | 6.91 | 682.0759 | 686.0832 | 214.9666  | 4.0073 | 7.3E+03 | 1 | 2 | <u>1</u>  |

|      |      |          |          |           |        |         |   |   |
|------|------|----------|----------|-----------|--------|---------|---|---|
| 1270 | 6.92 | 747.4384 | 749.4388 | 1026.7601 | 2.0004 | 3.2E+04 | 2 | 2 |
| 1275 | 6.93 | 715.4347 | 717.4366 | 962.7527  | 2.0020 | 9.1E+03 | 2 | 2 |
| 1280 | 6.93 | 763.0976 | 765.1082 | 529.0393  | 2.0106 | 3.4E+04 | 1 | 1 |
| 1283 | 6.94 | 467.0563 | 469.0669 | 232.9980  | 2.0106 | 7.0E+03 | 1 | 1 |
| 1284 | 6.94 | 627.1792 | 629.1837 | 393.1208  | 2.0045 | 8.1E+03 | 1 | 1 |
| 1287 | 6.94 | 756.1120 | 760.1251 | 289.0026  | 4.0131 | 1.6E+04 | 1 | 2 |
| 1299 | 6.94 | 381.1478 | 383.1543 | 147.0895  | 2.0064 | 1.1E+04 | 1 | 1 |
| 1310 | 6.95 | 570.0948 | 572.0968 | 672.0730  | 2.0020 | 5.5E+04 | 2 | 2 |
| 1319 | 6.96 | 551.3295 | 553.3400 | 634.5425  | 2.0104 | 6.2E+03 | 2 | 2 |
| 1323 | 6.96 | 582.0900 | 586.1082 | 114.9807  | 4.0182 | 6.0E+04 | 1 | 2 |
| 1324 | 6.96 | 593.3474 | 595.3549 | 718.5782  | 2.0075 | 2.1E+04 | 2 | 2 |
| 1328 | 6.96 | 582.0923 | 584.0962 | 348.0340  | 2.0039 | 5.1E+04 | 1 | 1 |
| 1333 | 6.96 | 777.4406 | 779.4389 | 543.3823  | 1.9983 | 2.3E+04 | 1 | 1 |
| 1335 | 6.97 | 563.0942 | 565.0969 | 329.0359  | 2.0027 | 1.6E+04 | 1 | 1 |
| 1343 | 6.97 | 777.4380 | 779.4434 | 543.3797  | 2.0054 | 2.7E+04 | 1 | 1 |
| 1346 | 6.97 | 778.1062 | 780.1060 | 544.0479  | 1.9998 | 1.6E+04 | 1 | 1 |
| 1352 | 6.97 | 777.4400 | 779.4533 | 543.3817  | 2.0133 | 1.7E+04 | 1 | 1 |
| 1358 | 6.98 | 582.0958 | 584.0993 | 348.0374  | 2.0035 | 4.4E+04 | 1 | 1 |
| 1370 | 6.98 | 723.4384 | 725.4362 | 489.3800  | 1.9978 | 3.2E+04 | 1 | 1 |
| 1375 | 6.99 | 748.1086 | 752.1288 | 280.9993  | 4.0202 | 6.4E+03 | 1 | 2 |
| 1378 | 6.99 | 600.3376 | 602.3463 | 732.5585  | 2.0088 | 9.8E+03 | 2 | 2 |
| 1381 | 6.99 | 778.1073 | 780.1204 | 544.0490  | 2.0131 | 1.8E+04 | 1 | 1 |
| 1395 | 7.00 | 768.4601 | 770.4626 | 534.4018  | 2.0026 | 1.9E+04 | 1 | 1 |
| 1397 | 7.00 | 574.1007 | 576.1025 | 340.0424  | 2.0018 | 1.7E+04 | 1 | 1 |
| 1404 | 7.01 | 783.1342 | 787.1553 | 316.0249  | 4.0211 | 7.4E+03 | 1 | 2 |
| 1410 | 7.01 | 783.1317 | 785.1343 | 549.0734  | 2.0026 | 7.9E+03 | 1 | 1 |
| 1411 | 7.01 | 670.3278 | 672.3318 | 436.2695  | 2.0040 | 2.0E+04 | 1 | 1 |
| 1414 | 7.01 | 592.1078 | 594.1098 | 716.0989  | 2.0020 | 3.0E+04 | 2 | 2 |
| 1415 | 7.01 | 783.4664 | 785.4708 | 549.4081  | 2.0044 | 1.2E+04 | 1 | 1 |
| 1426 | 7.02 | 792.4474 | 794.4526 | 558.3891  | 2.0052 | 1.4E+04 | 1 | 1 |
| 1435 | 7.03 | 679.4118 | 681.4124 | 445.3535  | 2.0007 | 1.6E+04 | 1 | 1 |
| 1441 | 7.03 | 593.1014 | 595.1081 | 359.0431  | 2.0066 | 3.3E+04 | 1 | 1 |
| 1442 | 7.03 | 584.0978 | 586.1095 | 700.0789  | 2.0118 | 9.8E+03 | 2 | 2 |
| 1447 | 7.03 | 695.3193 | 697.3236 | 461.2610  | 2.0043 | 1.4E+04 | 1 | 1 |
| 1454 | 7.04 | 450.1682 | 452.1797 | 216.1099  | 2.0114 | 1.1E+04 | 1 | 1 |
| 1459 | 7.04 | 785.1385 | 789.1420 | 318.0291  | 4.0036 | 2.1E+04 | 1 | 2 |
| 1462 | 7.05 | 770.1286 | 774.1353 | 303.0193  | 4.0067 | 1.2E+04 | 1 | 2 |
| 1470 | 7.06 | 611.0915 | 613.0954 | 754.0663  | 2.0039 | 1.8E+04 | 2 | 2 |
| 1483 | 7.07 | 595.1036 | 597.1131 | 722.0905  | 2.0095 | 7.8E+03 | 2 | 2 |
| 1494 | 7.08 | 392.1636 | 394.1699 | 158.1053  | 2.0063 | 9.3E+03 | 1 | 1 |
| 1496 | 7.08 | 596.1128 | 598.1144 | 362.0545  | 2.0016 | 9.4E+03 | 1 | 1 |
| 1497 | 7.08 | 603.1148 | 605.1168 | 738.1130  | 2.0020 | 1.6E+04 | 2 | 2 |
| 1512 | 7.10 | 427.0983 | 429.1052 | 193.0400  | 2.0070 | 8.7E+03 | 1 | 1 |
| 1515 | 7.11 | 615.1205 | 617.1301 | 381.0621  | 2.0096 | 1.1E+04 | 1 | 1 |
| 1518 | 7.11 | 615.1136 | 619.1277 | 148.0043  | 4.0141 | 1.3E+04 | 1 | 2 |
| 1526 | 7.11 | 625.1997 | 627.2036 | 391.1413  | 2.0039 | 7.3E+03 | 1 | 1 |
| 1527 | 7.12 | 619.8721 | 621.8729 | 771.6275  | 2.0009 | 8.0E+03 | 2 | 2 |
| 1529 | 7.12 | 614.1206 | 616.1232 | 760.1245  | 2.0026 | 9.0E+03 | 2 | 2 |

|           |
|-----------|
| <u>1</u>  |
| <u>3</u>  |
| <u>1</u>  |
| <u>1</u>  |
| <u>16</u> |
| <u>7</u>  |
| <u>39</u> |
| <u>1</u>  |
| <u>1</u>  |
| <u>16</u> |
| <u>1</u>  |
| <u>1</u>  |
| <u>2</u>  |
| <u>2</u>  |
| <u>1</u>  |
| <u>7</u>  |
| <u>1</u>  |
| <u>1</u>  |
| <u>6</u>  |
| <u>2</u>  |
| <u>2</u>  |
| <u>1</u>  |
| <u>2</u>  |
| <u>4</u>  |
| <u>1</u>  |
| <u>1</u>  |
| <u>6</u>  |
| <u>2</u>  |
| <u>1</u>  |
| <u>1</u>  |
| <u>1</u>  |
| <u>15</u> |
| <u>5</u>  |
| <u>1</u>  |
| <u>3</u>  |
| <u>2</u>  |
| <u>6</u>  |
| <u>5</u>  |
| <u>2</u>  |
| <u>18</u> |
| <u>1</u>  |
| <u>1</u>  |
| <u>5</u>  |
| <u>2</u>  |
| <u>5</u>  |



|      |      |          |          |          |        |         |   |   |
|------|------|----------|----------|----------|--------|---------|---|---|
| 1533 | 7.13 | 553.3304 | 555.3331 | 319.2721 | 2.0026 | 7.3E+03 | 1 | 1 |
| 1535 | 7.13 | 626.1173 | 630.1366 | 159.0080 | 4.0192 | 1.4E+04 | 1 | 2 |
| 1544 | 7.14 | 626.1296 | 628.1403 | 392.0712 | 2.0107 | 9.0E+03 | 1 | 1 |
| 1546 | 7.15 | 383.0730 | 385.0794 | 149.0147 | 2.0064 | 9.6E+03 | 1 | 1 |
| 1547 | 7.15 | 616.6156 | 618.6276 | 765.1146 | 2.0119 | 7.2E+03 | 2 | 2 |
| 1552 | 7.16 | 630.3735 | 632.3743 | 396.3152 | 2.0008 | 9.0E+03 | 1 | 1 |
| 1564 | 7.18 | 633.3827 | 635.3870 | 798.6488 | 2.0043 | 1.1E+04 | 2 | 2 |
| 1571 | 7.22 | 367.1317 | 369.1375 | 133.0733 | 2.0059 | 2.1E+04 | 1 | 1 |
| 1576 | 7.23 | 605.1589 | 607.1651 | 371.1006 | 2.0062 | 7.6E+03 | 1 | 1 |
| 1578 | 7.24 | 669.3228 | 671.3261 | 435.2645 | 2.0033 | 1.2E+04 | 1 | 1 |
| 1579 | 7.24 | 478.1634 | 480.1699 | 244.1051 | 2.0065 | 9.1E+03 | 1 | 1 |
| 1590 | 7.30 | 606.3574 | 608.3628 | 372.2991 | 2.0055 | 7.2E+03 | 1 | 1 |
| 1596 | 7.31 | 677.4094 | 679.4118 | 886.7021 | 2.0025 | 8.4E+03 | 2 | 2 |
| 1599 | 7.35 | 358.0416 | 360.0477 | 123.9833 | 2.0061 | 1.9E+04 | 1 | 1 |
| 1611 | 7.44 | 378.1483 | 380.1540 | 144.0900 | 2.0057 | 8.0E+03 | 1 | 1 |
| 1613 | 7.48 | 625.1625 | 627.1667 | 391.1042 | 2.0042 | 1.5E+04 | 1 | 1 |
| 1614 | 7.48 | 359.1059 | 361.1125 | 125.0476 | 2.0066 | 1.4E+04 | 1 | 1 |
| 1615 | 7.50 | 437.0943 | 439.0987 | 203.0360 | 2.0044 | 1.1E+04 | 1 | 1 |
| 1622 | 7.61 | 587.1299 | 589.1339 | 353.0716 | 2.0040 | 8.1E+03 | 1 | 1 |
| 1631 | 7.82 | 452.1842 | 454.1903 | 218.1259 | 2.0061 | 1.7E+04 | 1 | 1 |
| 1632 | 7.83 | 453.1317 | 455.1387 | 219.0734 | 2.0070 | 1.0E+04 | 1 | 1 |
| 1633 | 7.86 | 623.1555 | 625.1617 | 389.0972 | 2.0062 | 1.2E+04 | 1 | 1 |
| 1645 | 8.02 | 355.0922 | 357.0987 | 242.0678 | 2.0065 | 1.6E+04 | 2 | 2 |
| 1651 | 8.09 | 737.1916 | 739.2033 | 503.1333 | 2.0117 | 6.8E+03 | 1 | 1 |
| 1654 | 8.10 | 657.3943 | 659.3960 | 846.6720 | 2.0017 | 6.3E+03 | 2 | 2 |
| 1655 | 8.10 | 739.2036 | 741.2042 | 505.1453 | 2.0007 | 1.4E+04 | 1 | 1 |
| 1658 | 8.10 | 736.1933 | 740.2058 | 269.0839 | 4.0125 | 9.6E+03 | 1 | 2 |
| 1671 | 8.24 | 420.1582 | 422.1650 | 186.0998 | 2.0069 | 9.5E+03 | 1 | 1 |
| 1678 | 8.28 | 635.2398 | 637.2413 | 401.1815 | 2.0015 | 8.6E+03 | 1 | 1 |
| 1684 | 8.28 | 451.1049 | 453.1094 | 434.0931 | 2.0045 | 1.4E+04 | 2 | 2 |
| 1685 | 8.28 | 489.1214 | 491.1263 | 255.0630 | 2.0049 | 6.2E+03 | 1 | 1 |
| 1694 | 8.29 | 601.1473 | 603.1514 | 367.0889 | 2.0041 | 8.8E+03 | 1 | 1 |
| 1697 | 8.29 | 559.1093 | 561.1137 | 325.0510 | 2.0044 | 7.2E+03 | 1 | 1 |
| 1708 | 8.31 | 540.1349 | 542.1414 | 306.0765 | 2.0065 | 6.1E+05 | 1 | 1 |
| 1717 | 8.32 | 639.3851 | 641.3879 | 405.3268 | 2.0028 | 7.2E+03 | 1 | 1 |
| 1719 | 8.32 | 567.0953 | 569.0987 | 333.0370 | 2.0034 | 1.3E+04 | 1 | 1 |
| 1723 | 8.32 | 661.1576 | 663.1561 | 427.0992 | 1.9985 | 1.7E+05 | 1 | 1 |
| 1727 | 8.33 | 695.3338 | 697.3415 | 461.2755 | 2.0077 | 1.2E+04 | 1 | 1 |
| 1730 | 8.33 | 645.2454 | 647.2466 | 411.1871 | 2.0012 | 9.7E+03 | 1 | 1 |
| 1733 | 8.34 | 659.1510 | 661.1576 | 425.0927 | 2.0066 | 8.5E+04 | 1 | 1 |
| 1735 | 8.34 | 584.1187 | 586.1249 | 350.0604 | 2.0062 | 7.7E+03 | 1 | 1 |
| 1745 | 8.36 | 664.2584 | 666.2596 | 430.2000 | 2.0012 | 1.1E+04 | 1 | 1 |
| 1749 | 8.37 | 571.2038 | 575.2181 | 104.0945 | 4.0143 | 7.1E+03 | 1 | 2 |
| 1750 | 8.38 | 583.6037 | 585.6047 | 699.0907 | 2.0010 | 7.4E+03 | 2 | 2 |
| 1751 | 8.38 | 664.1144 | 666.1165 | 430.0561 | 2.0021 | 1.1E+04 | 1 | 1 |
| 1752 | 8.38 | 667.1172 | 669.1177 | 433.0589 | 2.0005 | 6.2E+03 | 1 | 1 |
| 1756 | 8.39 | 654.3956 | 656.3960 | 420.3373 | 2.0003 | 6.4E+03 | 1 | 1 |
| 1758 | 8.39 | 673.1207 | 675.1227 | 439.0624 | 2.0019 | 9.0E+03 | 1 | 1 |

|                    |
|--------------------|
| <a href="#">2</a>  |
| <a href="#">1</a>  |
| <a href="#">37</a> |
| <a href="#">6</a>  |
| <a href="#">4</a>  |
| <a href="#">1</a>  |
| <a href="#">29</a> |
| <a href="#">40</a> |
| <a href="#">5</a>  |
| <a href="#">15</a> |
| <a href="#">12</a> |
| <a href="#">1</a>  |
| <a href="#">9</a>  |
| <a href="#">3</a>  |
| <a href="#">17</a> |
| <a href="#">13</a> |
| <a href="#">15</a> |
| <a href="#">2</a>  |
| <a href="#">4</a>  |
| <a href="#">17</a> |
| <a href="#">1</a>  |
| <a href="#">2</a>  |
| <a href="#">13</a> |
| <a href="#">5</a>  |
| <a href="#">4</a>  |
| <a href="#">1</a>  |
| <a href="#">15</a> |
| <a href="#">4</a>  |
| <a href="#">8</a>  |
| <a href="#">3</a>  |
| <a href="#">7</a>  |
| <a href="#">1</a>  |
| <a href="#">1</a>  |
| <a href="#">5</a>  |
| <a href="#">4</a>  |
| <a href="#">3</a>  |
| <a href="#">6</a>  |
| <a href="#">4</a>  |
| <a href="#">2</a>  |
| <a href="#">6</a>  |
| <a href="#">2</a>  |
| <a href="#">4</a>  |
| <a href="#">6</a>  |
| <a href="#">1</a>  |
| <a href="#">6</a>  |
| <a href="#">1</a>  |
| <a href="#">6</a>  |
| <a href="#">7</a>  |

|      |      |          |          |          |        |         |   |   |           |
|------|------|----------|----------|----------|--------|---------|---|---|-----------|
| 1759 | 8.39 | 677.2653 | 679.2669 | 443.2070 | 2.0016 | 6.2E+03 | 1 | 1 | <u>3</u>  |
| 1760 | 8.40 | 664.4003 | 666.4025 | 430.3420 | 2.0022 | 8.6E+03 | 1 | 1 | <u>4</u>  |
| 1765 | 8.40 | 682.3286 | 684.3307 | 896.5405 | 2.0022 | 9.2E+03 | 2 | 2 | <u>12</u> |
| 1767 | 8.40 | 658.2537 | 660.2551 | 424.1954 | 2.0014 | 7.3E+03 | 1 | 1 | <u>8</u>  |
| 1776 | 8.43 | 589.1053 | 591.1077 | 710.0940 | 2.0023 | 7.8E+03 | 2 | 2 | <u>3</u>  |
| 1782 | 8.44 | 677.1225 | 681.1303 | 210.0131 | 4.0078 | 9.5E+03 | 1 | 2 | <u>1</u>  |
| 1784 | 8.44 | 683.4108 | 685.4131 | 449.3525 | 2.0022 | 9.6E+03 | 1 | 1 | <u>9</u>  |
| 1789 | 8.45 | 605.7412 | 607.7418 | 743.3657 | 2.0007 | 8.0E+03 | 2 | 2 | <u>1</u>  |
| 1793 | 8.45 | 685.3384 | 687.3374 | 451.2801 | 1.9990 | 2.8E+04 | 1 | 1 | <u>1</u>  |
| 1796 | 8.45 | 597.7340 | 599.7389 | 727.3513 | 2.0050 | 6.7E+03 | 2 | 2 | <u>3</u>  |
| 1798 | 8.46 | 683.2688 | 685.2703 | 449.2104 | 2.0015 | 9.1E+03 | 1 | 1 | <u>2</u>  |
| 1800 | 8.47 | 692.4175 | 694.4191 | 916.7183 | 2.0016 | 6.5E+03 | 2 | 2 | <u>9</u>  |
| 1805 | 8.47 | 677.1225 | 679.1228 | 443.0641 | 2.0003 | 6.7E+03 | 1 | 1 | <u>2</u>  |
| 1806 | 8.48 | 600.1137 | 602.1156 | 732.1108 | 2.0019 | 6.3E+03 | 2 | 2 | <u>3</u>  |
| 1812 | 8.48 | 614.2448 | 616.2480 | 380.1865 | 2.0031 | 7.2E+03 | 1 | 1 | <u>2</u>  |
| 1817 | 8.49 | 702.1375 | 704.1398 | 468.0792 | 2.0023 | 7.7E+03 | 1 | 1 | <u>4</u>  |
| 1820 | 8.50 | 616.7491 | 618.7502 | 765.3816 | 2.0011 | 7.1E+03 | 2 | 2 | <u>2</u>  |
| 1822 | 8.50 | 512.1249 | 514.1312 | 278.0665 | 2.0064 | 1.8E+04 | 1 | 1 | <u>1</u>  |
| 1823 | 8.50 | 512.6239 | 514.6302 | 557.1311 | 2.0063 | 1.7E+04 | 2 | 2 | <u>2</u>  |
| 1827 | 8.50 | 609.1169 | 611.1193 | 750.1172 | 2.0023 | 6.1E+03 | 2 | 2 | <u>1</u>  |
| 1832 | 8.51 | 708.4283 | 710.4297 | 474.3699 | 2.0015 | 9.8E+03 | 1 | 1 | <u>5</u>  |
| 1837 | 8.52 | 616.6213 | 618.6247 | 765.1260 | 2.0034 | 8.7E+03 | 2 | 2 | <u>1</u>  |
| 1847 | 8.53 | 633.3814 | 635.3846 | 798.6461 | 2.0032 | 7.0E+03 | 2 | 2 | <u>12</u> |
| 1854 | 8.54 | 622.2522 | 624.2544 | 776.3877 | 2.0022 | 6.1E+03 | 2 | 2 | <u>4</u>  |
| 1870 | 8.56 | 630.8808 | 632.8809 | 793.6449 | 2.0001 | 9.3E+03 | 2 | 2 | <u>14</u> |
| 1875 | 8.56 | 644.2632 | 646.2647 | 820.4099 | 2.0014 | 6.2E+03 | 2 | 2 | <u>3</u>  |
| 1876 | 8.56 | 644.3912 | 646.3886 | 820.6658 | 1.9974 | 7.0E+03 | 2 | 2 | <u>8</u>  |
| 1899 | 8.62 | 652.8917 | 654.8929 | 837.6669 | 2.0011 | 9.7E+03 | 2 | 2 | <u>14</u> |
| 1900 | 8.62 | 493.2112 | 495.2167 | 259.1529 | 2.0055 | 7.3E+03 | 1 | 1 | <u>4</u>  |
| 1904 | 8.64 | 320.1063 | 322.1115 | 86.0480  | 2.0052 | 3.0E+04 | 1 | 1 | <u>5</u>  |
| 1914 | 8.69 | 674.9066 | 676.9125 | 881.6966 | 2.0059 | 6.3E+03 | 2 | 2 | <u>2</u>  |
| 1915 | 8.69 | 376.1696 | 378.1754 | 142.1113 | 2.0057 | 9.4E+03 | 1 | 1 | <u>5</u>  |
| 1918 | 8.76 | 680.0716 | 682.0747 | 446.0133 | 2.0031 | 7.0E+03 | 1 | 1 | <u>3</u>  |
| 1923 | 8.81 | 366.1017 | 368.1080 | 132.0434 | 2.0063 | 7.7E+03 | 1 | 1 | <u>4</u>  |
| 1931 | 8.88 | 969.2027 | 971.2069 | 735.1443 | 2.0043 | 8.8E+03 | 1 | 1 | <u>1</u>  |
| 1932 | 8.88 | 466.1995 | 468.2071 | 232.1412 | 2.0076 | 8.1E+03 | 1 | 1 | <u>9</u>  |
| 1933 | 8.89 | 420.1582 | 422.1651 | 186.0999 | 2.0068 | 1.0E+04 | 1 | 1 | <u>15</u> |
| 1934 | 8.89 | 947.2202 | 949.2222 | 713.1619 | 2.0020 | 4.6E+04 | 1 | 1 | <u>1</u>  |
| 1936 | 8.91 | 496.0956 | 498.0927 | 262.0373 | 1.9971 | 6.2E+04 | 1 | 1 | <u>1</u>  |
| 1938 | 8.93 | 434.1151 | 436.1217 | 400.1135 | 2.0066 | 6.6E+03 | 2 | 2 | <u>15</u> |
| 1942 | 8.96 | 924.2434 | 926.2435 | 690.1851 | 2.0001 | 1.9E+04 | 1 | 1 | <u>1</u>  |
| 1947 | 9.05 | 367.1320 | 369.1381 | 133.0737 | 2.0061 | 2.7E+04 | 1 | 1 | <u>40</u> |
| 1958 | 9.25 | 489.1326 | 491.1347 | 255.0743 | 2.0022 | 2.1E+04 | 1 | 1 | <u>9</u>  |
| 1959 | 9.27 | 278.0956 | 280.1032 | 44.0373  | 2.0076 | 9.1E+03 | 1 | 1 | <u>1</u>  |
| 1960 | 9.28 | 602.1301 | 604.1351 | 368.0718 | 2.0049 | 9.8E+03 | 1 | 1 | <u>3</u>  |
| 1961 | 9.28 | 543.2092 | 545.2108 | 309.1509 | 2.0016 | 7.6E+03 | 1 | 1 | <u>1</u>  |
| 1963 | 9.33 | 485.1208 | 487.1252 | 251.0624 | 2.0045 | 1.1E+04 | 1 | 1 | <u>6</u>  |
| 1964 | 9.35 | 440.1306 | 442.1343 | 206.0722 | 2.0038 | 1.1E+04 | 1 | 1 | <u>19</u> |

|      |       |          |          |          |        |         |   |   |
|------|-------|----------|----------|----------|--------|---------|---|---|
| 1966 | 9.41  | 466.2000 | 468.2091 | 232.1417 | 2.0091 | 1.1E+04 | 1 | 1 |
| 1971 | 9.49  | 357.0889 | 359.0955 | 123.0305 | 2.0066 | 1.2E+04 | 1 | 1 |
| 1980 | 9.58  | 531.1298 | 533.1354 | 594.1429 | 2.0056 | 1.8E+04 | 2 | 2 |
| 1981 | 9.58  | 341.5870 | 343.5934 | 215.0574 | 2.0064 | 9.8E+03 | 2 | 2 |
| 1992 | 9.60  | 476.1150 | 478.1211 | 242.0567 | 2.0061 | 1.6E+04 | 1 | 1 |
| 1998 | 9.63  | 476.6130 | 478.6185 | 485.1093 | 2.0055 | 1.2E+04 | 2 | 2 |
| 2001 | 9.76  | 414.5979 | 416.6043 | 361.0792 | 2.0064 | 1.3E+04 | 2 | 2 |
| 2004 | 9.80  | 785.1847 | 787.1843 | 551.1264 | 1.9996 | 3.0E+04 | 1 | 1 |
| 2005 | 9.80  | 783.1785 | 785.1838 | 549.1202 | 2.0054 | 4.1E+04 | 1 | 1 |
| 2006 | 9.81  | 711.1326 | 713.1352 | 477.0742 | 2.0026 | 1.5E+04 | 1 | 1 |
| 2007 | 9.81  | 355.0637 | 357.0693 | 242.0108 | 2.0055 | 7.1E+03 | 2 | 2 |
| 2011 | 9.85  | 714.3312 | 716.3408 | 480.2729 | 2.0096 | 6.4E+03 | 1 | 1 |
| 2016 | 9.88  | 367.1070 | 369.1106 | 133.0487 | 2.0036 | 1.4E+04 | 1 | 1 |
| 2022 | 9.97  | 795.2759 | 797.2787 | 561.2176 | 2.0029 | 1.6E+04 | 1 | 1 |
| 2024 | 9.97  | 292.1112 | 294.1162 | 58.0528  | 2.0051 | 2.9E+04 | 1 | 1 |
| 2030 | 9.99  | 711.1323 | 713.1363 | 477.0740 | 2.0040 | 8.9E+03 | 1 | 1 |
| 2032 | 10.02 | 397.1348 | 399.1418 | 326.1529 | 2.0070 | 7.7E+03 | 2 | 2 |
| 2034 | 10.07 | 399.5879 | 401.5950 | 331.0592 | 2.0070 | 6.3E+03 | 2 | 2 |
| 2035 | 10.07 | 436.1897 | 438.1950 | 202.1314 | 2.0053 | 1.1E+04 | 1 | 1 |
| 2037 | 10.10 | 379.5836 | 381.5902 | 291.0506 | 2.0066 | 8.1E+03 | 2 | 2 |
| 2040 | 10.15 | 296.0953 | 298.1014 | 62.0370  | 2.0061 | 4.7E+04 | 1 | 1 |
| 2041 | 10.16 | 439.0989 | 441.1043 | 205.0406 | 2.0054 | 1.5E+04 | 1 | 1 |
| 2044 | 10.24 | 340.1215 | 342.1282 | 106.0632 | 2.0067 | 2.0E+04 | 1 | 1 |
| 2045 | 10.25 | 362.1532 | 364.1595 | 128.0948 | 2.0063 | 5.7E+04 | 1 | 1 |
| 2046 | 10.26 | 486.1697 | 488.1760 | 252.1114 | 2.0062 | 1.0E+04 | 1 | 1 |
| 2049 | 10.29 | 458.1191 | 460.1213 | 224.0608 | 2.0022 | 2.4E+04 | 1 | 1 |
| 2051 | 10.31 | 514.1656 | 516.1768 | 280.1073 | 2.0112 | 6.8E+03 | 1 | 1 |
| 2052 | 10.31 | 446.0936 | 448.1017 | 424.0705 | 2.0081 | 6.4E+03 | 2 | 2 |
| 2055 | 10.33 | 381.1474 | 383.1545 | 147.0891 | 2.0071 | 9.1E+03 | 1 | 1 |
| 2059 | 10.34 | 424.0994 | 426.1057 | 190.0411 | 2.0063 | 6.3E+04 | 1 | 1 |
| 2060 | 10.34 | 727.2555 | 729.2611 | 493.1972 | 2.0056 | 6.9E+03 | 1 | 1 |
| 2063 | 10.34 | 581.1188 | 583.1212 | 347.0605 | 2.0024 | 1.2E+04 | 1 | 1 |
| 2069 | 10.38 | 899.2100 | 901.2090 | 665.1517 | 1.9990 | 2.7E+04 | 1 | 1 |
| 2071 | 10.38 | 410.5865 | 412.5933 | 353.0564 | 2.0067 | 1.2E+04 | 2 | 2 |
| 2073 | 10.39 | 409.5867 | 411.5932 | 351.0567 | 2.0065 | 3.6E+04 | 2 | 2 |
| 2075 | 10.39 | 448.1026 | 450.1090 | 428.0885 | 2.0064 | 2.6E+05 | 2 | 2 |
| 2077 | 10.39 | 384.1478 | 386.1543 | 150.0894 | 2.0065 | 3.3E+04 | 1 | 1 |
| 2078 | 10.41 | 897.2111 | 899.2110 | 663.1528 | 1.9998 | 4.1E+04 | 1 | 1 |
| 2081 | 10.47 | 554.1311 | 556.1381 | 320.0728 | 2.0071 | 2.6E+04 | 1 | 1 |
| 2096 | 10.56 | 697.3207 | 701.3337 | 230.2114 | 4.0130 | 1.2E+04 | 1 | 2 |
| 2097 | 10.57 | 530.1084 | 532.1133 | 296.0501 | 2.0049 | 9.8E+03 | 1 | 1 |
| 2099 | 10.58 | 466.2002 | 468.2058 | 232.1418 | 2.0057 | 1.5E+04 | 1 | 1 |
| 2105 | 10.65 | 711.3360 | 713.3382 | 477.2776 | 2.0022 | 2.5E+04 | 1 | 1 |
| 2108 | 10.68 | 420.1117 | 422.1182 | 372.1067 | 2.0065 | 6.3E+03 | 2 | 2 |
| 2110 | 10.68 | 658.2377 | 660.2365 | 424.1794 | 1.9988 | 8.6E+03 | 1 | 1 |
| 2121 | 10.75 | 436.1894 | 438.1951 | 202.1310 | 2.0057 | 1.1E+04 | 1 | 1 |
| 2127 | 10.83 | 785.1850 | 787.1851 | 551.1267 | 2.0001 | 2.4E+04 | 1 | 1 |
| 2128 | 10.83 | 783.1785 | 785.1837 | 549.1201 | 2.0053 | 2.8E+04 | 1 | 1 |

|                    |
|--------------------|
| <a href="#">9</a>  |
| <a href="#">1</a>  |
| <a href="#">1</a>  |
| <a href="#">2</a>  |
| <a href="#">6</a>  |
| <a href="#">7</a>  |
| <a href="#">16</a> |
| <a href="#">9</a>  |
| <a href="#">1</a>  |
| <a href="#">1</a>  |
| <a href="#">7</a>  |
| <a href="#">22</a> |
| <a href="#">1</a>  |
| <a href="#">1</a>  |
| <a href="#">1</a>  |
| <a href="#">3</a>  |
| <a href="#">2</a>  |
| <a href="#">14</a> |
| <a href="#">3</a>  |
| <a href="#">19</a> |
| <a href="#">18</a> |
| <a href="#">19</a> |
| <a href="#">8</a>  |
| <a href="#">9</a>  |
| <a href="#">1</a>  |
| <a href="#">4</a>  |
| <a href="#">3</a>  |
| <a href="#">39</a> |
| <a href="#">2</a>  |
| <a href="#">2</a>  |
| <a href="#">9</a>  |
| <a href="#">1</a>  |
| <a href="#">1</a>  |
| <a href="#">1</a>  |
| <a href="#">16</a> |
| <a href="#">2</a>  |
| <a href="#">4</a>  |
| <a href="#">2</a>  |
| <a href="#">6</a>  |
| <a href="#">9</a>  |
| <a href="#">5</a>  |
| <a href="#">5</a>  |
| <a href="#">1</a>  |
| <a href="#">14</a> |
| <a href="#">9</a>  |
| <a href="#">1</a>  |

|      |       |          |          |          |        |         |   |   |           |
|------|-------|----------|----------|----------|--------|---------|---|---|-----------|
| 2131 | 10.87 | 495.0531 | 497.0557 | 260.9947 | 2.0026 | 2.4E+04 | 1 | 1 | <u>2</u>  |
| 2132 | 10.88 | 318.1271 | 320.1329 | 84.0688  | 2.0057 | 4.4E+04 | 1 | 1 | <u>2</u>  |
| 2135 | 10.90 | 441.1145 | 443.1209 | 207.0562 | 2.0063 | 1.8E+04 | 1 | 1 | <u>22</u> |
| 2145 | 11.00 | 418.5910 | 420.5979 | 369.0653 | 2.0070 | 7.9E+04 | 2 | 2 | <u>3</u>  |
| 2153 | 11.03 | 419.5908 | 421.5980 | 371.0650 | 2.0072 | 1.2E+04 | 2 | 2 | <u>2</u>  |
| 2157 | 11.06 | 886.3586 | 888.3650 | 652.3003 | 2.0064 | 1.7E+04 | 1 | 1 | <u>1</u>  |
| 2160 | 11.16 | 565.2695 | 567.2751 | 331.2112 | 2.0056 | 2.1E+04 | 1 | 1 | <u>3</u>  |
| 2169 | 11.18 | 563.2623 | 565.2693 | 329.2040 | 2.0070 | 1.2E+04 | 1 | 1 | <u>6</u>  |
| 2182 | 11.21 | 335.1428 | 337.1495 | 101.0845 | 2.0067 | 1.2E+04 | 1 | 1 | <u>20</u> |
| 2190 | 11.24 | 626.2628 | 628.2677 | 392.2045 | 2.0049 | 6.3E+03 | 1 | 1 | <u>4</u>  |
| 2192 | 11.26 | 606.2857 | 608.2889 | 372.2274 | 2.0032 | 5.0E+04 | 1 | 1 | <u>1</u>  |
| 2196 | 11.29 | 736.1932 | 740.2054 | 269.0839 | 4.0122 | 9.7E+03 | 1 | 2 | <u>1</u>  |
| 2208 | 11.31 | 427.1197 | 429.1267 | 386.1227 | 2.0070 | 7.4E+03 | 2 | 2 | <u>5</u>  |
| 2210 | 11.31 | 388.1376 | 390.1448 | 308.1585 | 2.0072 | 9.1E+03 | 2 | 2 | <u>12</u> |
| 2213 | 11.31 | 426.1176 | 428.1254 | 384.1186 | 2.0077 | 2.9E+04 | 2 | 2 | <u>13</u> |
| 2227 | 11.35 | 340.1217 | 342.1272 | 106.0633 | 2.0055 | 1.8E+04 | 1 | 1 | <u>19</u> |
| 2231 | 11.37 | 665.3315 | 667.3379 | 431.2732 | 2.0064 | 4.3E+04 | 1 | 1 | <u>1</u>  |
| 2235 | 11.38 | 711.3657 | 713.3679 | 477.3073 | 2.0022 | 1.1E+05 | 1 | 1 | <u>12</u> |
| 2238 | 11.42 | 753.3836 | 755.3878 | 519.3253 | 2.0042 | 6.1E+05 | 1 | 1 | <u>2</u>  |
| 2243 | 11.47 | 709.3571 | 711.3637 | 475.2987 | 2.0067 | 8.6E+04 | 1 | 1 | <u>4</u>  |
| 2250 | 11.53 | 892.4242 | 894.4270 | 658.3659 | 2.0027 | 9.0E+04 | 1 | 1 | <u>2</u>  |
| 2253 | 11.55 | 335.1427 | 337.1501 | 101.0844 | 2.0074 | 8.7E+03 | 1 | 1 | <u>20</u> |
| 2255 | 11.56 | 887.4700 | 889.4733 | 653.4116 | 2.0033 | 1.1E+05 | 1 | 1 | <u>2</u>  |
| 2258 | 11.58 | 560.2521 | 562.2561 | 326.1938 | 2.0040 | 5.1E+04 | 1 | 1 | <u>3</u>  |
| 2261 | 11.61 | 384.1469 | 386.1512 | 150.0885 | 2.0043 | 2.3E+04 | 1 | 1 | <u>16</u> |
| 2268 | 11.62 | 621.1583 | 625.1717 | 154.0490 | 4.0134 | 4.4E+04 | 1 | 2 | <u>10</u> |
| 2271 | 11.63 | 311.0827 | 313.0894 | 154.0487 | 2.0068 | 5.9E+04 | 2 | 2 | <u>10</u> |
| 2282 | 11.65 | 846.3887 | 848.3944 | 612.3304 | 2.0057 | 1.8E+04 | 1 | 1 | <u>1</u>  |
| 2284 | 11.65 | 499.2551 | 501.2621 | 530.3935 | 2.0071 | 7.2E+03 | 2 | 2 | <u>2</u>  |
| 2323 | 11.70 | 587.3060 | 589.3134 | 706.4954 | 2.0074 | 9.7E+03 | 2 | 2 | <u>58</u> |
| 2324 | 11.70 | 346.0868 | 348.0931 | 112.0285 | 2.0063 | 8.1E+05 | 1 | 1 | <u>1</u>  |
| 2330 | 11.70 | 565.2947 | 567.3030 | 662.4728 | 2.0083 | 1.1E+04 | 2 | 2 | <u>1</u>  |
| 2344 | 11.71 | 621.1584 | 625.1708 | 154.0490 | 4.0124 | 3.4E+04 | 1 | 2 | <u>10</u> |
| 2356 | 11.72 | 609.3179 | 611.3264 | 750.5191 | 2.0085 | 1.2E+04 | 2 | 2 | <u>94</u> |
| 2359 | 11.72 | 631.3322 | 633.3409 | 397.2738 | 2.0088 | 1.3E+04 | 1 | 1 | <u>3</u>  |
| 2369 | 11.74 | 653.3462 | 655.3537 | 838.5759 | 2.0075 | 1.9E+04 | 2 | 2 | <u>5</u>  |
| 2377 | 11.74 | 524.2802 | 526.2910 | 290.2219 | 2.0108 | 2.4E+04 | 1 | 1 | <u>2</u>  |
| 2392 | 11.76 | 697.3718 | 699.3795 | 463.3135 | 2.0077 | 2.9E+04 | 1 | 1 | <u>1</u>  |
| 2394 | 11.76 | 436.1900 | 438.1959 | 202.1317 | 2.0059 | 1.1E+04 | 1 | 1 | <u>14</u> |
| 2417 | 11.77 | 764.4144 | 766.4218 | 530.3561 | 2.0074 | 1.4E+04 | 1 | 1 | <u>4</u>  |
| 2421 | 11.78 | 786.4278 | 788.4341 | 552.3694 | 2.0063 | 1.5E+04 | 1 | 1 | <u>2</u>  |
| 2422 | 11.78 | 808.4404 | 810.4472 | 574.3821 | 2.0068 | 1.6E+04 | 1 | 1 | <u>3</u>  |
| 2430 | 11.79 | 697.8737 | 699.8812 | 927.6308 | 2.0075 | 2.0E+04 | 2 | 2 | <u>12</u> |
| 2431 | 11.79 | 785.4241 | 787.4294 | 551.3658 | 2.0053 | 4.1E+04 | 1 | 1 | <u>2</u>  |
| 2444 | 11.80 | 852.4669 | 854.4727 | 618.4085 | 2.0058 | 1.7E+04 | 1 | 1 | <u>1</u>  |
| 2446 | 11.80 | 829.9516 | 831.9581 | 595.8933 | 2.0065 | 3.0E+04 | 1 | 1 | <u>1</u>  |
| 2447 | 11.81 | 914.4685 | 916.4822 | 680.4102 | 2.0137 | 1.1E+04 | 1 | 1 | <u>2</u>  |
| 2449 | 11.81 | 452.2467 | 454.2533 | 218.1884 | 2.0066 | 2.6E+04 | 1 | 1 | <u>4</u>  |

|      |       |          |          |           |        |         |   |   |           |
|------|-------|----------|----------|-----------|--------|---------|---|---|-----------|
| 2458 | 11.81 | 830.4532 | 832.4595 | 596.3948  | 2.0064 | 1.5E+04 | 1 | 1 | <u>7</u>  |
| 2459 | 11.81 | 719.3858 | 721.3927 | 485.3275  | 2.0069 | 3.4E+04 | 1 | 1 | <u>18</u> |
| 2467 | 11.82 | 874.4789 | 876.4842 | 640.4205  | 2.0053 | 1.7E+04 | 1 | 1 | <u>1</u>  |
| 2473 | 11.82 | 958.4948 | 960.5044 | 724.4364  | 2.0096 | 1.3E+04 | 1 | 1 | <u>7</u>  |
| 2480 | 11.83 | 741.3985 | 743.4056 | 507.3402  | 2.0072 | 3.8E+04 | 1 | 1 | <u>6</u>  |
| 2482 | 11.83 | 895.9915 | 897.9957 | 661.9332  | 2.0042 | 2.9E+04 | 1 | 1 | <u>1</u>  |
| 2483 | 11.83 | 896.4924 | 898.4971 | 662.4341  | 2.0047 | 1.6E+04 | 1 | 1 | <u>1</u>  |
| 2489 | 11.84 | 918.5057 | 920.5097 | 684.4474  | 2.0040 | 1.5E+04 | 1 | 1 | <u>3</u>  |
| 2490 | 11.84 | 763.4115 | 765.4181 | 529.3532  | 2.0065 | 3.9E+04 | 1 | 1 | <u>10</u> |
| 2494 | 11.84 | 563.2621 | 565.2679 | 329.2038  | 2.0057 | 1.3E+04 | 1 | 1 | <u>6</u>  |
| 2497 | 11.85 | 940.5190 | 942.5186 | 706.4607  | 1.9996 | 1.4E+04 | 1 | 1 | <u>4</u>  |
| 2501 | 11.85 | 744.4099 | 746.4223 | 1020.7031 | 2.0124 | 1.4E+04 | 2 | 2 | <u>10</u> |
| 2507 | 11.86 | 962.5311 | 964.5345 | 1456.9456 | 2.0034 | 1.4E+04 | 2 | 2 | <u>1</u>  |
| 2510 | 11.86 | 496.2724 | 498.2817 | 262.2141  | 2.0093 | 6.8E+04 | 1 | 1 | <u>3</u>  |
| 2513 | 11.86 | 807.4372 | 809.4441 | 573.3789  | 2.0069 | 4.1E+04 | 1 | 1 | <u>7</u>  |
| 2521 | 11.87 | 607.2887 | 609.2989 | 373.2304  | 2.0101 | 1.1E+04 | 1 | 1 | <u>5</u>  |
| 2522 | 11.87 | 956.4882 | 958.4945 | 722.4298  | 2.0064 | 1.9E+04 | 1 | 1 | <u>1</u>  |
| 2532 | 11.87 | 870.4427 | 872.4463 | 636.3844  | 2.0037 | 2.1E+04 | 1 | 1 | <u>2</u>  |
| 2535 | 11.87 | 912.4624 | 914.4693 | 678.4041  | 2.0069 | 2.5E+04 | 1 | 1 | <u>1</u>  |
| 2537 | 11.87 | 851.4641 | 853.4688 | 617.4057  | 2.0048 | 3.8E+04 | 1 | 1 | <u>2</u>  |
| 2538 | 11.88 | 514.2862 | 516.2977 | 280.2279  | 2.0115 | 1.4E+04 | 1 | 1 | <u>1</u>  |
| 2561 | 11.89 | 983.5444 | 985.5476 | 749.4861  | 2.0032 | 2.1E+04 | 1 | 1 | <u>13</u> |
| 2570 | 11.90 | 603.3383 | 605.3439 | 738.5600  | 2.0056 | 8.7E+03 | 2 | 2 | <u>46</u> |
| 2572 | 11.91 | 520.2943 | 522.2985 | 572.4720  | 2.0041 | 2.3E+04 | 2 | 2 | <u>1</u>  |
| 2573 | 11.91 | 895.4908 | 897.4968 | 661.4325  | 2.0060 | 3.5E+04 | 1 | 1 | <u>10</u> |
| 2585 | 11.91 | 384.1470 | 386.1536 | 150.0887  | 2.0066 | 1.8E+04 | 1 | 1 | <u>16</u> |
| 2612 | 11.94 | 577.3115 | 579.3204 | 343.2532  | 2.0089 | 1.9E+04 | 1 | 1 | <u>1</u>  |
| 2613 | 11.94 | 592.5871 | 594.5997 | 717.0575  | 2.0126 | 8.9E+03 | 2 | 2 | <u>3</u>  |
| 2625 | 11.95 | 549.3133 | 551.3142 | 630.5100  | 2.0008 | 1.2E+04 | 2 | 2 | <u>1</u>  |
| 2632 | 11.96 | 564.3203 | 566.3258 | 660.5239  | 2.0055 | 9.7E+03 | 2 | 2 | <u>3</u>  |
| 2634 | 11.96 | 505.2860 | 507.2875 | 542.4553  | 2.0016 | 1.8E+04 | 2 | 2 | <u>5</u>  |
| 2637 | 11.96 | 788.4350 | 790.4456 | 1108.7533 | 2.0106 | 7.0E+03 | 2 | 2 | <u>15</u> |
| 2645 | 11.96 | 722.3998 | 724.4023 | 976.6830  | 2.0025 | 1.4E+04 | 2 | 2 | <u>3</u>  |
| 2656 | 11.98 | 562.3107 | 564.3207 | 656.5047  | 2.0100 | 1.5E+04 | 2 | 2 | <u>66</u> |
| 2659 | 11.98 | 729.0721 | 731.0778 | 495.0138  | 2.0058 | 1.2E+04 | 1 | 1 | <u>1</u>  |
| 2665 | 11.98 | 661.3720 | 663.3749 | 427.3137  | 2.0029 | 1.0E+04 | 1 | 1 | <u>1</u>  |
| 2675 | 11.99 | 720.0715 | 722.0780 | 486.0132  | 2.0064 | 9.3E+03 | 1 | 1 | <u>1</u>  |
| 2679 | 11.99 | 760.4296 | 762.4422 | 526.3713  | 2.0126 | 7.6E+03 | 1 | 1 | <u>1</u>  |
| 2694 | 12.03 | 562.0678 | 564.0708 | 328.0095  | 2.0029 | 9.5E+03 | 1 | 1 | <u>2</u>  |
| 2698 | 12.16 | 456.1581 | 458.1637 | 222.0997  | 2.0056 | 8.4E+03 | 1 | 1 | <u>23</u> |
| 2699 | 12.20 | 332.1428 | 334.1497 | 98.0845   | 2.0069 | 3.1E+04 | 1 | 1 | <u>1</u>  |
| 2705 | 12.25 | 420.1582 | 422.1648 | 186.0999  | 2.0066 | 9.6E+03 | 1 | 1 | <u>15</u> |
| 2708 | 12.29 | 355.1636 | 357.1700 | 242.2106  | 2.0064 | 2.4E+04 | 2 | 2 | <u>1</u>  |
| 2709 | 12.30 | 371.1405 | 373.1462 | 274.1643  | 2.0057 | 7.7E+03 | 2 | 2 | <u>2</u>  |
| 2715 | 12.42 | 569.2171 | 571.2218 | 335.1588  | 2.0047 | 5.9E+04 | 1 | 1 | <u>16</u> |
| 2720 | 12.54 | 470.1737 | 472.1812 | 236.1154  | 2.0075 | 9.8E+03 | 1 | 1 | <u>11</u> |
| 2721 | 12.57 | 367.0785 | 369.0849 | 133.0202  | 2.0063 | 2.4E+06 | 1 | 1 | <u>4</u>  |
| 2739 | 12.75 | 473.0861 | 475.0915 | 239.0278  | 2.0054 | 5.0E+04 | 1 | 1 | <u>2</u>  |

|      |       |          |          |          |        |         |   |   |                    |
|------|-------|----------|----------|----------|--------|---------|---|---|--------------------|
| 2746 | 12.86 | 371.1405 | 373.1473 | 274.1644 | 2.0068 | 9.5E+03 | 2 | 2 | <a href="#">2</a>  |
| 2753 | 12.95 | 400.1398 | 402.1486 | 332.1630 | 2.0088 | 1.4E+04 | 2 | 2 | <a href="#">6</a>  |
| 2767 | 13.05 | 369.0976 | 371.1071 | 270.0786 | 2.0095 | 7.1E+03 | 2 | 2 | <a href="#">1</a>  |
| 2770 | 13.07 | 736.1929 | 740.2068 | 269.0835 | 4.0139 | 6.2E+03 | 1 | 2 | <a href="#">1</a>  |
| 2774 | 13.10 | 847.1922 | 851.2059 | 380.0829 | 4.0137 | 1.4E+04 | 1 | 2 | <a href="#">2</a>  |
| 2783 | 13.31 | 461.0989 | 463.1055 | 454.0812 | 2.0066 | 2.6E+04 | 2 | 2 | <a href="#">3</a>  |
| 2786 | 13.33 | 425.1071 | 427.1129 | 382.0975 | 2.0058 | 7.7E+03 | 2 | 2 | <a href="#">2</a>  |
| 2788 | 13.33 | 462.0995 | 464.1059 | 456.0824 | 2.0064 | 9.4E+03 | 2 | 2 | <a href="#">1</a>  |
| 2791 | 13.34 | 393.1348 | 395.1408 | 318.1530 | 2.0060 | 8.3E+03 | 2 | 2 | <a href="#">5</a>  |
| 2804 | 13.53 | 683.3213 | 685.3228 | 449.2629 | 2.0016 | 1.3E+04 | 1 | 1 | <a href="#">2</a>  |
| 2807 | 13.56 | 681.3102 | 683.3221 | 447.2519 | 2.0118 | 1.5E+04 | 1 | 1 | <a href="#">1</a>  |
| 2816 | 13.62 | 351.1015 | 353.1085 | 117.0432 | 2.0070 | 2.7E+05 | 1 | 1 | <a href="#">1</a>  |
| 2820 | 13.65 | 312.6370 | 314.6439 | 157.1573 | 2.0070 | 3.8E+04 | 2 | 2 | <a href="#">1</a>  |
| 2824 | 13.68 | 434.1734 | 436.1794 | 200.1151 | 2.0060 | 1.1E+04 | 1 | 1 | <a href="#">11</a> |
| 2825 | 13.70 | 491.1120 | 493.1176 | 257.0537 | 2.0055 | 2.1E+04 | 1 | 1 | <a href="#">2</a>  |
| 2830 | 13.85 | 596.0822 | 598.0883 | 362.0239 | 2.0061 | 2.6E+04 | 1 | 1 | <a href="#">3</a>  |
| 2843 | 13.96 | 391.6002 | 393.6063 | 315.0838 | 2.0061 | 6.9E+03 | 2 | 2 | <a href="#">7</a>  |
| 2844 | 13.96 | 390.6004 | 392.6071 | 313.0841 | 2.0068 | 2.6E+04 | 2 | 2 | <a href="#">11</a> |
| 2847 | 13.97 | 350.6272 | 352.6343 | 233.1378 | 2.0071 | 2.9E+04 | 2 | 2 | <a href="#">1</a>  |
| 2861 | 14.04 | 751.2039 | 755.2170 | 284.0945 | 4.0132 | 1.3E+04 | 1 | 2 | <a href="#">1</a>  |
| 2869 | 14.08 | 346.0926 | 348.0972 | 224.0686 | 2.0046 | 1.2E+04 | 2 | 2 | <a href="#">12</a> |
| 2870 | 14.09 | 729.2445 | 733.2589 | 262.1351 | 4.0144 | 9.0E+03 | 1 | 2 | <a href="#">2</a>  |
| 2895 | 14.17 | 365.6235 | 367.6305 | 263.1305 | 2.0069 | 7.2E+03 | 2 | 2 | <a href="#">6</a>  |
| 2897 | 14.18 | 464.2202 | 466.2274 | 230.1619 | 2.0071 | 7.9E+03 | 1 | 1 | <a href="#">4</a>  |
| 2899 | 14.19 | 363.6174 | 365.6245 | 259.1181 | 2.0072 | 6.3E+03 | 2 | 2 | <a href="#">11</a> |
| 2902 | 14.21 | 439.0986 | 441.1004 | 205.0403 | 2.0018 | 2.3E+04 | 1 | 1 | <a href="#">18</a> |
| 2916 | 14.25 | 622.1612 | 626.1754 | 155.0518 | 4.0143 | 7.0E+03 | 1 | 2 | <a href="#">1</a>  |
| 2925 | 14.31 | 360.0902 | 362.0966 | 126.0319 | 2.0064 | 1.8E+04 | 1 | 1 | <a href="#">15</a> |
| 2933 | 14.36 | 311.0826 | 313.0892 | 154.0486 | 2.0065 | 8.3E+04 | 2 | 2 | <a href="#">10</a> |
| 2935 | 14.36 | 457.0645 | 459.0710 | 446.0124 | 2.0065 | 1.2E+04 | 2 | 2 | <a href="#">3</a>  |
| 2938 | 14.37 | 357.6353 | 359.6421 | 247.1540 | 2.0067 | 8.7E+03 | 2 | 2 | <a href="#">2</a>  |
| 2950 | 14.44 | 711.1454 | 713.1463 | 477.0871 | 2.0009 | 1.8E+04 | 1 | 1 | <a href="#">6</a>  |
| 2960 | 14.49 | 913.1219 | 917.1354 | 446.0125 | 4.0135 | 6.5E+03 | 1 | 2 | <a href="#">3</a>  |
| 2961 | 14.49 | 621.1575 | 625.1712 | 154.0481 | 4.0137 | 2.8E+04 | 1 | 2 | <a href="#">2</a>  |
| 2971 | 14.56 | 381.0937 | 383.1003 | 147.0354 | 2.0067 | 1.8E+04 | 1 | 1 | <a href="#">4</a>  |
| 2975 | 14.58 | 621.1581 | 625.1711 | 154.0487 | 4.0131 | 1.1E+04 | 1 | 2 | <a href="#">10</a> |
| 2979 | 14.62 | 804.3203 | 806.3264 | 570.2620 | 2.0061 | 1.8E+04 | 1 | 1 | <a href="#">1</a>  |
| 2984 | 14.72 | 457.0654 | 459.0699 | 446.0142 | 2.0045 | 1.4E+04 | 2 | 2 | <a href="#">3</a>  |
| 2987 | 14.73 | 703.1674 | 705.1690 | 469.1091 | 2.0015 | 9.8E+03 | 1 | 1 | <a href="#">4</a>  |
| 2992 | 14.75 | 708.1878 | 710.1878 | 474.1295 | 2.0000 | 1.3E+04 | 1 | 1 | <a href="#">2</a>  |
| 2994 | 14.75 | 599.1208 | 601.1219 | 365.0625 | 2.0011 | 1.3E+04 | 1 | 1 | <a href="#">7</a>  |
| 2995 | 14.77 | 352.0895 | 354.0936 | 236.0623 | 2.0042 | 8.8E+03 | 2 | 2 | <a href="#">3</a>  |
| 2998 | 14.80 | 597.1139 | 599.1196 | 363.0556 | 2.0056 | 1.8E+04 | 1 | 1 | <a href="#">1</a>  |
| 2999 | 14.81 | 357.6350 | 359.6414 | 247.1534 | 2.0064 | 8.7E+03 | 2 | 2 | <a href="#">2</a>  |
| 3003 | 15.00 | 754.2036 | 758.2168 | 287.0943 | 4.0131 | 1.1E+05 | 1 | 2 | <a href="#">4</a>  |
| 3005 | 15.01 | 725.2059 | 729.2197 | 258.0966 | 4.0138 | 1.1E+04 | 1 | 2 | <a href="#">15</a> |
| 3011 | 15.03 | 388.1074 | 390.1141 | 154.0491 | 2.0067 | 3.0E+05 | 1 | 1 | <a href="#">10</a> |
| 3012 | 15.03 | 377.1038 | 379.1102 | 286.0910 | 2.0064 | 2.4E+04 | 2 | 2 | <a href="#">8</a>  |

|      |       |          |          |          |        |         |   |   |
|------|-------|----------|----------|----------|--------|---------|---|---|
| 3014 | 15.04 | 378.1068 | 380.1106 | 288.0969 | 2.0038 | 8.2E+03 | 2 | 2 |
| 3016 | 15.06 | 754.2026 | 756.2077 | 520.1443 | 2.0051 | 5.1E+04 | 1 | 1 |
| 3019 | 15.06 | 318.0794 | 320.0862 | 84.0211  | 2.0068 | 4.4E+04 | 1 | 1 |
| 3020 | 15.10 | 349.1584 | 351.1648 | 115.1000 | 2.0065 | 8.1E+03 | 1 | 1 |
| 3023 | 15.13 | 498.2054 | 500.2101 | 264.1471 | 2.0047 | 7.1E+03 | 1 | 1 |
| 3024 | 15.16 | 335.6220 | 337.6291 | 203.1273 | 2.0072 | 6.2E+03 | 2 | 2 |
| 3025 | 15.16 | 754.2031 | 758.2175 | 287.0938 | 4.0144 | 2.5E+04 | 1 | 2 |
| 3031 | 15.28 | 377.1031 | 379.1099 | 286.0896 | 2.0068 | 7.2E+03 | 2 | 2 |
| 3034 | 15.30 | 377.1775 | 379.1839 | 286.2384 | 2.0064 | 5.7E+04 | 2 | 2 |
| 3040 | 15.33 | 776.3294 | 780.3436 | 309.2200 | 4.0142 | 2.7E+04 | 1 | 2 |
| 3046 | 15.35 | 439.0987 | 441.1053 | 205.0404 | 2.0066 | 1.1E+04 | 1 | 1 |
| 3047 | 15.38 | 349.1582 | 351.1646 | 115.0999 | 2.0064 | 7.2E+03 | 1 | 1 |
| 3049 | 15.40 | 377.1761 | 379.1825 | 143.1178 | 2.0063 | 3.2E+05 | 1 | 1 |
| 3050 | 15.42 | 779.3409 | 781.3416 | 545.2826 | 2.0007 | 1.8E+04 | 1 | 1 |
| 3056 | 15.50 | 776.3289 | 780.3418 | 309.2195 | 4.0129 | 3.6E+04 | 1 | 2 |
| 3060 | 15.55 | 384.1484 | 386.1552 | 150.0900 | 2.0069 | 1.6E+04 | 1 | 1 |
| 3062 | 15.59 | 478.2359 | 480.2427 | 244.1775 | 2.0068 | 1.7E+04 | 1 | 1 |
| 3064 | 15.63 | 318.0796 | 320.0867 | 84.0213  | 2.0070 | 1.1E+04 | 1 | 1 |
| 3066 | 15.63 | 736.1923 | 740.2051 | 269.0829 | 4.0128 | 5.6E+04 | 1 | 2 |
| 3067 | 15.64 | 349.1579 | 351.1650 | 115.0995 | 2.0071 | 8.9E+03 | 1 | 1 |
| 3085 | 15.75 | 501.2054 | 503.2105 | 267.1471 | 2.0051 | 1.1E+04 | 1 | 1 |
| 3086 | 15.76 | 736.1924 | 740.2059 | 269.0831 | 4.0135 | 1.2E+04 | 1 | 2 |
| 3089 | 15.76 | 335.6221 | 337.6287 | 203.1276 | 2.0066 | 5.3E+04 | 2 | 2 |
| 3090 | 15.77 | 349.1583 | 351.1647 | 115.1000 | 2.0064 | 7.0E+03 | 1 | 1 |
| 3091 | 15.79 | 336.1193 | 338.1259 | 204.1219 | 2.0067 | 1.8E+04 | 2 | 2 |
| 3099 | 15.93 | 311.0822 | 313.0896 | 154.0479 | 2.0074 | 9.6E+03 | 2 | 2 |
| 3101 | 15.95 | 664.1955 | 666.1961 | 430.1372 | 2.0006 | 2.0E+04 | 1 | 1 |
| 3103 | 15.96 | 370.0567 | 372.0635 | 271.9967 | 2.0068 | 7.8E+03 | 2 | 2 |
| 3107 | 16.01 | 604.2216 | 606.2281 | 370.1633 | 2.0065 | 9.0E+03 | 1 | 1 |
| 3109 | 16.03 | 334.0741 | 336.0806 | 100.0158 | 2.0065 | 3.4E+04 | 1 | 1 |
| 3118 | 16.22 | 604.2195 | 606.2257 | 370.1612 | 2.0062 | 8.4E+03 | 1 | 1 |
| 3121 | 16.24 | 393.1499 | 395.1530 | 159.0916 | 2.0031 | 1.1E+04 | 1 | 1 |
| 3122 | 16.25 | 478.2366 | 480.2401 | 244.1782 | 2.0036 | 1.6E+04 | 1 | 1 |
| 3135 | 16.43 | 466.1429 | 468.1493 | 232.0846 | 2.0064 | 6.9E+03 | 1 | 1 |
| 3137 | 16.48 | 679.1411 | 681.1403 | 445.0827 | 1.9993 | 1.6E+04 | 1 | 1 |
| 3145 | 16.62 | 346.0660 | 348.0725 | 224.0154 | 2.0065 | 1.3E+04 | 2 | 2 |
| 3159 | 16.81 | 977.4105 | 981.4264 | 510.3012 | 4.0158 | 1.0E+04 | 1 | 2 |
| 3162 | 16.85 | 363.6537 | 365.6606 | 259.1908 | 2.0069 | 1.1E+04 | 2 | 2 |
| 3165 | 16.90 | 346.5960 | 348.6028 | 225.0753 | 2.0068 | 8.2E+03 | 2 | 2 |
| 3169 | 16.97 | 307.1476 | 309.1536 | 73.0892  | 2.0060 | 1.4E+04 | 1 | 1 |
| 3175 | 17.08 | 343.1214 | 345.1286 | 218.1262 | 2.0071 | 9.3E+03 | 2 | 2 |
| 3176 | 17.08 | 738.3205 | 740.3278 | 504.2622 | 2.0072 | 8.9E+03 | 1 | 1 |
| 3177 | 17.13 | 440.1737 | 442.1789 | 206.1154 | 2.0052 | 3.7E+04 | 1 | 1 |
| 3178 | 17.13 | 509.1776 | 511.1824 | 275.1193 | 2.0048 | 9.4E+03 | 1 | 1 |
| 3218 | 17.65 | 644.2236 | 646.2239 | 410.1652 | 2.0004 | 1.7E+04 | 1 | 1 |
| 3222 | 17.66 | 300.0799 | 302.0867 | 132.0432 | 2.0067 | 2.6E+04 | 2 | 2 |
| 3228 | 17.69 | 735.2087 | 739.2218 | 268.0994 | 4.0131 | 1.7E+05 | 1 | 2 |
| 3230 | 17.69 | 735.2076 | 737.2134 | 501.1493 | 2.0059 | 4.8E+04 | 1 | 1 |

|                    |
|--------------------|
| <a href="#">30</a> |
| <a href="#">5</a>  |
| <a href="#">13</a> |
| <a href="#">21</a> |
| <a href="#">9</a>  |
| <a href="#">11</a> |
| <a href="#">4</a>  |
| <a href="#">1</a>  |
| <a href="#">1</a>  |
| <a href="#">1</a>  |
| <a href="#">18</a> |
| <a href="#">21</a> |
| <a href="#">1</a>  |
| <a href="#">1</a>  |
| <a href="#">1</a>  |
| <a href="#">1</a>  |
| <a href="#">13</a> |
| <a href="#">1</a>  |
| <a href="#">21</a> |
| <a href="#">9</a>  |
| <a href="#">1</a>  |
| <a href="#">11</a> |
| <a href="#">21</a> |
| <a href="#">4</a>  |
| <a href="#">2</a>  |
| <a href="#">3</a>  |
| <a href="#">1</a>  |
| <a href="#">3</a>  |
| <a href="#">16</a> |
| <a href="#">2</a>  |
| <a href="#">1</a>  |
| <a href="#">1</a>  |
| <a href="#">9</a>  |
| <a href="#">2</a>  |
| <a href="#">3</a>  |
| <a href="#">20</a> |
| <a href="#">8</a>  |
| <a href="#">4</a>  |
| <a href="#">4</a>  |
| <a href="#">5</a>  |
| <a href="#">4</a>  |
| <a href="#">1</a>  |
| <a href="#">4</a>  |
| <a href="#">2</a>  |
| <a href="#">5</a>  |

|      |       |          |          |          |        |         |   |   |
|------|-------|----------|----------|----------|--------|---------|---|---|
| 3232 | 17.70 | 318.0794 | 320.0861 | 84.0210  | 2.0068 | 1.6E+04 | 1 | 1 |
| 3236 | 17.72 | 388.1070 | 390.1134 | 154.0487 | 2.0064 | 1.0E+04 | 1 | 1 |
| 3237 | 17.73 | 438.1573 | 440.1646 | 408.1981 | 2.0073 | 6.3E+03 | 2 | 2 |
| 3241 | 17.75 | 792.2607 | 796.2731 | 325.1514 | 4.0124 | 6.3E+03 | 1 | 2 |
| 3242 | 17.76 | 348.0904 | 350.0968 | 114.0321 | 2.0064 | 1.4E+04 | 1 | 1 |
| 3243 | 17.76 | 712.1818 | 716.1980 | 245.0724 | 4.0162 | 6.9E+03 | 1 | 2 |
| 3254 | 17.80 | 735.2061 | 737.2142 | 501.1478 | 2.0080 | 8.6E+03 | 1 | 1 |
| 3294 | 18.04 | 350.1300 | 352.1367 | 232.1433 | 2.0067 | 1.5E+04 | 2 | 2 |
| 3300 | 18.11 | 355.6370 | 357.6435 | 243.1575 | 2.0065 | 1.2E+04 | 2 | 2 |
| 3301 | 18.12 | 741.3880 | 743.3929 | 507.3296 | 2.0049 | 1.5E+04 | 1 | 1 |
| 3305 | 18.15 | 334.1582 | 336.1643 | 100.0999 | 2.0061 | 1.9E+04 | 1 | 1 |
| 3307 | 18.27 | 334.1583 | 336.1619 | 100.0999 | 2.0037 | 4.6E+04 | 1 | 1 |
| 3309 | 18.29 | 904.3773 | 908.3955 | 437.2680 | 4.0181 | 1.5E+05 | 1 | 2 |
| 3310 | 18.31 | 320.6344 | 322.6413 | 173.1523 | 2.0069 | 8.5E+03 | 2 | 2 |
| 3314 | 18.34 | 362.1893 | 364.1953 | 128.1310 | 2.0059 | 3.1E+04 | 1 | 1 |
| 3318 | 18.36 | 355.6372 | 357.6444 | 243.1579 | 2.0071 | 1.1E+04 | 2 | 2 |
| 3328 | 18.43 | 452.6916 | 454.7009 | 437.2666 | 2.0093 | 1.7E+05 | 2 | 2 |
| 3344 | 18.47 | 369.0672 | 371.0729 | 270.0178 | 2.0056 | 1.1E+04 | 2 | 2 |
| 3345 | 18.48 | 453.1911 | 455.2020 | 438.2655 | 2.0109 | 6.7E+03 | 2 | 2 |
| 3346 | 18.48 | 924.3568 | 926.3613 | 690.2984 | 2.0046 | 1.9E+04 | 1 | 1 |
| 3352 | 18.52 | 368.0675 | 370.0742 | 268.0184 | 2.0067 | 1.9E+04 | 2 | 2 |
| 3361 | 18.57 | 362.1895 | 364.1956 | 128.1312 | 2.0060 | 3.2E+04 | 1 | 1 |
| 3364 | 18.58 | 381.0938 | 383.0999 | 147.0355 | 2.0060 | 1.8E+04 | 1 | 1 |
| 3365 | 18.58 | 453.1909 | 455.2018 | 438.2651 | 2.0110 | 1.1E+04 | 2 | 2 |
| 3371 | 18.60 | 356.6459 | 358.6522 | 245.1751 | 2.0063 | 2.0E+04 | 2 | 2 |
| 3378 | 18.65 | 324.1049 | 326.1112 | 90.0466  | 2.0063 | 1.3E+04 | 1 | 1 |
| 3388 | 18.73 | 311.0832 | 313.0898 | 154.0497 | 2.0066 | 7.0E+04 | 2 | 2 |
| 3403 | 18.83 | 389.1245 | 391.1325 | 310.1324 | 2.0080 | 1.5E+04 | 2 | 2 |
| 3405 | 18.84 | 751.2035 | 755.2162 | 284.0941 | 4.0127 | 1.9E+04 | 1 | 2 |
| 3410 | 18.89 | 389.1201 | 391.1257 | 310.1237 | 2.0056 | 7.7E+03 | 2 | 2 |
| 3420 | 18.94 | 387.1137 | 389.1188 | 153.0554 | 2.0051 | 1.1E+04 | 1 | 1 |
| 3425 | 18.97 | 409.1245 | 411.1303 | 175.0662 | 2.0058 | 1.7E+04 | 1 | 1 |
| 3431 | 19.07 | 908.3958 | 910.3975 | 674.3375 | 2.0017 | 1.8E+04 | 1 | 1 |
| 3435 | 19.11 | 354.5653 | 356.5715 | 241.0140 | 2.0062 | 6.2E+03 | 2 | 2 |
| 3442 | 19.13 | 690.1395 | 692.1403 | 456.0812 | 2.0007 | 1.4E+04 | 1 | 1 |
| 3443 | 19.14 | 711.1324 | 715.1505 | 244.0230 | 4.0182 | 8.5E+03 | 1 | 2 |
| 3444 | 19.15 | 409.1245 | 411.1311 | 175.0662 | 2.0066 | 2.7E+04 | 1 | 1 |
| 3447 | 19.16 | 347.0887 | 349.0953 | 113.0304 | 2.0066 | 2.4E+05 | 1 | 1 |
| 3452 | 19.19 | 904.3773 | 908.3951 | 437.2680 | 4.0178 | 1.1E+04 | 1 | 2 |
| 3453 | 19.19 | 354.0792 | 356.0876 | 120.0209 | 2.0084 | 6.4E+03 | 1 | 1 |
| 3454 | 19.20 | 736.1931 | 738.1982 | 502.1348 | 2.0051 | 1.3E+05 | 1 | 1 |
| 3460 | 19.22 | 318.0793 | 320.0863 | 84.0210  | 2.0069 | 1.4E+05 | 1 | 1 |
| 3461 | 19.22 | 276.0689 | 278.0754 | 42.0105  | 2.0066 | 1.3E+05 | 1 | 1 |
| 3464 | 19.23 | 736.1940 | 740.2074 | 269.0847 | 4.0134 | 3.6E+05 | 1 | 2 |
| 3477 | 19.33 | 736.1929 | 740.2061 | 269.0836 | 4.0131 | 1.3E+05 | 1 | 2 |
| 3478 | 19.33 | 908.3964 | 910.3987 | 674.3380 | 2.0023 | 1.5E+04 | 1 | 1 |
| 3479 | 19.33 | 904.3767 | 908.3928 | 437.2673 | 4.0161 | 1.0E+04 | 1 | 2 |
| 3483 | 19.40 | 428.6061 | 430.6128 | 389.0955 | 2.0068 | 7.4E+03 | 2 | 2 |

|                    |
|--------------------|
| <a href="#">13</a> |
| <a href="#">10</a> |
| <a href="#">3</a>  |
| <a href="#">9</a>  |
| <a href="#">28</a> |
| <a href="#">6</a>  |
| <a href="#">3</a>  |
| <a href="#">9</a>  |
| <a href="#">2</a>  |
| <a href="#">5</a>  |
| <a href="#">2</a>  |
| <a href="#">2</a>  |
| <a href="#">2</a>  |
| <a href="#">5</a>  |
| <a href="#">1</a>  |
| <a href="#">2</a>  |
| <a href="#">2</a>  |
| <a href="#">1</a>  |
| <a href="#">2</a>  |
| <a href="#">2</a>  |
| <a href="#">4</a>  |
| <a href="#">1</a>  |
| <a href="#">1</a>  |
| <a href="#">1</a>  |
| <a href="#">4</a>  |
| <a href="#">5</a>  |
| <a href="#">6</a>  |
| <a href="#">5</a>  |
| <a href="#">10</a> |
| <a href="#">1</a>  |
| <a href="#">1</a>  |
| <a href="#">1</a>  |
| <a href="#">5</a>  |
| <a href="#">3</a>  |
| <a href="#">5</a>  |
| <a href="#">2</a>  |
| <a href="#">2</a>  |
| <a href="#">5</a>  |
| <a href="#">1</a>  |
| <a href="#">1</a>  |
| <a href="#">1</a>  |
| <a href="#">3</a>  |
| <a href="#">2</a>  |
| <a href="#">1</a>  |



|      |       |          |          |          |        |         |   |   |                    |
|------|-------|----------|----------|----------|--------|---------|---|---|--------------------|
| 3485 | 19.42 | 307.1473 | 309.1539 | 73.0889  | 2.0067 | 1.5E+05 | 1 | 1 | <a href="#">8</a>  |
| 3488 | 19.45 | 359.1018 | 361.1114 | 250.0870 | 2.0096 | 7.7E+03 | 2 | 2 | <a href="#">4</a>  |
| 3489 | 19.46 | 697.3646 | 699.3695 | 463.3063 | 2.0049 | 1.0E+04 | 1 | 1 | <a href="#">19</a> |
| 3498 | 19.55 | 717.1974 | 721.2095 | 250.0881 | 4.0121 | 8.4E+03 | 1 | 2 | <a href="#">4</a>  |
| 3501 | 19.56 | 421.1579 | 423.1653 | 374.1992 | 2.0074 | 6.8E+03 | 2 | 2 | <a href="#">1</a>  |
| 3504 | 19.66 | 303.0795 | 305.0859 | 69.0211  | 2.0064 | 2.0E+04 | 1 | 1 | <a href="#">3</a>  |
| 3507 | 19.67 | 375.1186 | 377.1247 | 282.1205 | 2.0061 | 6.5E+03 | 2 | 2 | <a href="#">13</a> |
| 3508 | 19.69 | 697.3643 | 699.3702 | 463.3060 | 2.0059 | 1.4E+04 | 1 | 1 | <a href="#">19</a> |
| 3512 | 19.72 | 721.2976 | 723.2978 | 487.2393 | 2.0001 | 3.1E+04 | 1 | 1 | <a href="#">1</a>  |
| 3514 | 19.75 | 718.2892 | 720.2942 | 484.2309 | 2.0050 | 9.2E+03 | 1 | 1 | <a href="#">1</a>  |
| 3517 | 19.76 | 699.3185 | 701.3196 | 465.2602 | 2.0011 | 2.5E+04 | 1 | 1 | <a href="#">4</a>  |
| 3526 | 19.84 | 757.3709 | 759.3729 | 523.3125 | 2.0020 | 7.1E+03 | 1 | 1 | <a href="#">2</a>  |
| 3529 | 19.86 | 476.2203 | 478.2265 | 242.1620 | 2.0062 | 7.8E+03 | 1 | 1 | <a href="#">4</a>  |
| 3534 | 20.03 | 363.6531 | 365.6603 | 259.1896 | 2.0072 | 7.3E+03 | 2 | 2 | <a href="#">3</a>  |
| 3536 | 20.11 | 311.0827 | 313.0893 | 154.0488 | 2.0065 | 8.4E+03 | 2 | 2 | <a href="#">10</a> |
| 3541 | 20.18 | 697.3635 | 699.3702 | 463.3052 | 2.0068 | 1.6E+04 | 1 | 1 | <a href="#">19</a> |
| 3550 | 20.25 | 421.1791 | 423.1853 | 187.1208 | 2.0062 | 8.8E+03 | 1 | 1 | <a href="#">22</a> |
| 3551 | 20.25 | 363.6527 | 365.6601 | 259.1887 | 2.0075 | 9.8E+03 | 2 | 2 | <a href="#">3</a>  |
| 3552 | 20.26 | 712.1815 | 716.1955 | 245.0722 | 4.0140 | 8.5E+03 | 1 | 2 | <a href="#">6</a>  |
| 3554 | 20.26 | 600.1055 | 602.1077 | 366.0472 | 2.0022 | 1.8E+04 | 1 | 1 | <a href="#">9</a>  |
| 3556 | 20.27 | 715.1922 | 717.1939 | 481.1339 | 2.0017 | 1.9E+04 | 1 | 1 | <a href="#">1</a>  |
| 3562 | 20.28 | 593.1626 | 595.1671 | 359.1043 | 2.0044 | 1.5E+04 | 1 | 1 | <a href="#">1</a>  |
| 3566 | 20.34 | 699.3715 | 701.3729 | 465.3131 | 2.0015 | 1.2E+04 | 1 | 1 | <a href="#">2</a>  |
| 3567 | 20.34 | 697.3632 | 699.3704 | 463.3048 | 2.0072 | 1.6E+04 | 1 | 1 | <a href="#">19</a> |
| 3570 | 20.35 | 759.3673 | 761.3714 | 525.3090 | 2.0041 | 7.3E+03 | 1 | 1 | <a href="#">5</a>  |
| 3571 | 20.36 | 368.0994 | 370.1068 | 268.0822 | 2.0074 | 7.6E+03 | 2 | 2 | <a href="#">3</a>  |
| 3575 | 20.42 | 361.1284 | 363.1328 | 254.1401 | 2.0044 | 8.9E+03 | 2 | 2 | <a href="#">1</a>  |
| 3576 | 20.44 | 759.3656 | 761.3689 | 525.3073 | 2.0033 | 8.3E+03 | 1 | 1 | <a href="#">9</a>  |
| 3580 | 20.47 | 590.1352 | 592.1421 | 356.0769 | 2.0069 | 7.6E+03 | 1 | 1 | <a href="#">2</a>  |
| 3584 | 20.49 | 669.3058 | 671.3085 | 435.2475 | 2.0027 | 3.6E+04 | 1 | 1 | <a href="#">3</a>  |
| 3590 | 20.58 | 353.1060 | 355.1131 | 238.0954 | 2.0071 | 1.0E+04 | 2 | 2 | <a href="#">19</a> |
| 3592 | 20.65 | 697.3641 | 699.3705 | 463.3058 | 2.0064 | 1.2E+04 | 1 | 1 | <a href="#">19</a> |
| 3599 | 20.74 | 667.2935 | 669.3055 | 433.2352 | 2.0119 | 1.0E+04 | 1 | 1 | <a href="#">1</a>  |
| 3600 | 20.74 | 697.3640 | 699.3693 | 463.3057 | 2.0052 | 3.7E+04 | 1 | 1 | <a href="#">19</a> |
| 3605 | 20.79 | 333.1635 | 335.1698 | 99.1052  | 2.0063 | 7.9E+03 | 1 | 1 | <a href="#">1</a>  |
| 3611 | 20.85 | 383.1033 | 385.1118 | 298.0899 | 2.0085 | 9.1E+03 | 2 | 2 | <a href="#">16</a> |
| 3617 | 20.90 | 757.3495 | 759.3560 | 523.2912 | 2.0065 | 9.1E+03 | 1 | 1 | <a href="#">9</a>  |
| 3620 | 20.91 | 383.6025 | 385.6093 | 299.0883 | 2.0068 | 1.4E+04 | 2 | 2 | <a href="#">4</a>  |
| 3622 | 20.91 | 564.2565 | 566.2602 | 330.1982 | 2.0037 | 3.5E+04 | 1 | 1 | <a href="#">9</a>  |
| 3626 | 20.93 | 765.1979 | 769.2149 | 298.0885 | 4.0171 | 6.9E+03 | 1 | 2 | <a href="#">7</a>  |
| 3627 | 20.93 | 382.6019 | 384.6088 | 297.0872 | 2.0069 | 5.9E+04 | 2 | 2 | <a href="#">19</a> |
| 3630 | 20.96 | 697.3639 | 699.3707 | 463.3056 | 2.0068 | 1.2E+04 | 1 | 1 | <a href="#">19</a> |
| 3631 | 20.96 | 674.2417 | 678.2558 | 207.1323 | 4.0142 | 8.4E+03 | 1 | 2 | <a href="#">1</a>  |
| 3635 | 20.98 | 454.2048 | 456.2111 | 220.1464 | 2.0064 | 6.8E+03 | 1 | 1 | <a href="#">1</a>  |
| 3636 | 20.99 | 631.2061 | 633.2072 | 397.1478 | 2.0011 | 3.4E+04 | 1 | 1 | <a href="#">3</a>  |
| 3638 | 21.01 | 412.1811 | 414.1865 | 356.2455 | 2.0054 | 6.0E+03 | 2 | 2 | <a href="#">1</a>  |
| 3639 | 21.03 | 980.4081 | 984.4266 | 513.2988 | 4.0185 | 6.5E+03 | 1 | 2 | <a href="#">1</a>  |
| 3641 | 21.05 | 759.3638 | 761.3704 | 525.3055 | 2.0066 | 1.4E+04 | 1 | 1 | <a href="#">9</a>  |

|      |       |          |          |          |        |         |   |   |
|------|-------|----------|----------|----------|--------|---------|---|---|
| 3645 | 21.08 | 588.2253 | 590.2320 | 354.1670 | 2.0067 | 6.5E+03 | 1 | 1 |
| 3647 | 21.10 | 741.3870 | 743.3956 | 507.3287 | 2.0086 | 8.3E+03 | 1 | 1 |
| 3653 | 21.16 | 697.3627 | 699.3706 | 463.3044 | 2.0079 | 2.0E+04 | 1 | 1 |
| 3655 | 21.22 | 368.1059 | 370.1100 | 134.0476 | 2.0041 | 1.2E+04 | 1 | 1 |
| 3657 | 21.27 | 697.3649 | 699.3709 | 463.3066 | 2.0059 | 2.2E+04 | 1 | 1 |
| 3660 | 21.39 | 317.5931 | 319.5997 | 167.0696 | 2.0066 | 1.9E+04 | 2 | 2 |
| 3669 | 22.02 | 736.1926 | 740.2063 | 269.0833 | 4.0136 | 5.2E+04 | 1 | 2 |
| 3677 | 22.14 | 711.1329 | 713.1343 | 477.0746 | 2.0014 | 3.7E+04 | 1 | 1 |
| 3679 | 22.24 | 662.0613 | 664.0658 | 428.0030 | 2.0045 | 1.1E+04 | 1 | 1 |
| 3681 | 22.29 | 349.1585 | 351.1640 | 115.1002 | 2.0055 | 2.1E+04 | 1 | 1 |
| 3684 | 22.31 | 360.1140 | 362.1195 | 252.1114 | 2.0055 | 1.1E+04 | 2 | 2 |
| 3688 | 22.34 | 759.3612 | 761.3696 | 525.3029 | 2.0084 | 1.5E+04 | 1 | 1 |
| 3691 | 22.34 | 697.3635 | 699.3701 | 463.3052 | 2.0066 | 9.1E+03 | 1 | 1 |
| 3694 | 22.36 | 699.3717 | 701.3766 | 465.3133 | 2.0049 | 1.4E+04 | 1 | 1 |
| 3695 | 22.36 | 335.1242 | 337.1308 | 202.1317 | 2.0066 | 6.7E+03 | 2 | 2 |
| 3697 | 22.38 | 711.1323 | 713.1334 | 477.0740 | 2.0011 | 1.7E+04 | 1 | 1 |
| 3699 | 22.41 | 518.2568 | 520.2620 | 284.1985 | 2.0052 | 6.4E+03 | 1 | 1 |
| 3705 | 22.45 | 697.3652 | 699.3715 | 463.3069 | 2.0063 | 1.3E+04 | 1 | 1 |
| 3708 | 22.47 | 557.2073 | 559.2148 | 323.1489 | 2.0075 | 1.5E+04 | 1 | 1 |
| 3711 | 22.49 | 450.1361 | 452.1402 | 216.0778 | 2.0041 | 1.3E+04 | 1 | 1 |
| 3713 | 22.49 | 311.0829 | 313.0895 | 154.0492 | 2.0066 | 8.9E+03 | 2 | 2 |
| 3726 | 22.53 | 355.0636 | 357.0696 | 242.0107 | 2.0060 | 2.2E+04 | 2 | 2 |
| 3727 | 22.53 | 654.1871 | 656.1859 | 420.1288 | 1.9988 | 5.4E+04 | 1 | 1 |
| 3728 | 22.53 | 651.1773 | 653.1816 | 417.1189 | 2.0044 | 6.4E+03 | 1 | 1 |
| 3731 | 22.53 | 650.1736 | 654.1863 | 183.0642 | 4.0127 | 8.4E+03 | 1 | 2 |
| 3732 | 22.54 | 699.3704 | 701.3785 | 465.3121 | 2.0081 | 1.3E+04 | 1 | 1 |
| 3733 | 22.54 | 711.1315 | 713.1317 | 477.0732 | 2.0003 | 6.3E+04 | 1 | 1 |
| 3736 | 22.56 | 759.3623 | 761.3696 | 525.3040 | 2.0073 | 2.1E+04 | 1 | 1 |
| 3739 | 22.58 | 354.0638 | 356.0706 | 120.0055 | 2.0068 | 1.1E+04 | 1 | 1 |
| 3741 | 22.62 | 431.1036 | 433.1096 | 197.0452 | 2.0061 | 9.4E+03 | 1 | 1 |
| 3747 | 22.68 | 697.3644 | 699.3713 | 463.3061 | 2.0069 | 1.1E+04 | 1 | 1 |
| 3748 | 22.69 | 757.3489 | 759.3613 | 523.2906 | 2.0124 | 8.5E+03 | 1 | 1 |
| 3750 | 22.70 | 359.0931 | 361.1006 | 250.0695 | 2.0076 | 7.8E+03 | 2 | 2 |
| 3751 | 22.70 | 352.0964 | 354.1069 | 118.0381 | 2.0105 | 7.0E+03 | 1 | 1 |
| 3756 | 22.73 | 699.3714 | 701.3806 | 465.3130 | 2.0093 | 1.2E+04 | 1 | 1 |
| 3757 | 22.75 | 611.2354 | 613.2375 | 377.1771 | 2.0020 | 1.5E+04 | 1 | 1 |
| 3768 | 22.78 | 318.0791 | 320.0861 | 84.0207  | 2.0070 | 8.8E+04 | 1 | 1 |
| 3769 | 22.78 | 348.0900 | 350.0966 | 114.0317 | 2.0066 | 5.1E+04 | 1 | 1 |
| 3776 | 22.80 | 717.1789 | 721.1923 | 250.0696 | 4.0134 | 4.0E+04 | 1 | 2 |
| 3780 | 22.81 | 697.3636 | 699.3705 | 463.3053 | 2.0069 | 1.9E+04 | 1 | 1 |
| 3781 | 22.82 | 311.0828 | 313.0893 | 154.0490 | 2.0065 | 1.8E+05 | 2 | 2 |
| 3782 | 22.82 | 718.1840 | 720.1854 | 484.1257 | 2.0014 | 1.5E+04 | 1 | 1 |
| 3783 | 22.82 | 388.1068 | 390.1132 | 154.0485 | 2.0064 | 4.5E+04 | 1 | 1 |
| 3787 | 22.84 | 759.3620 | 761.3686 | 525.3037 | 2.0066 | 1.9E+04 | 1 | 1 |
| 3788 | 22.87 | 757.3498 | 759.3623 | 523.2915 | 2.0125 | 7.7E+03 | 1 | 1 |
| 3791 | 22.91 | 697.3637 | 699.3697 | 463.3054 | 2.0060 | 8.8E+03 | 1 | 1 |
| 3792 | 22.91 | 761.3695 | 763.3702 | 527.3111 | 2.0008 | 1.1E+04 | 1 | 1 |
| 3801 | 23.01 | 761.3679 | 763.3717 | 527.3096 | 2.0038 | 8.0E+03 | 1 | 1 |

|                    |
|--------------------|
| <a href="#">1</a>  |
| <a href="#">5</a>  |
| <a href="#">19</a> |
| <a href="#">1</a>  |
| <a href="#">19</a> |
| <a href="#">20</a> |
| <a href="#">1</a>  |
| <a href="#">1</a>  |
| <a href="#">3</a>  |
| <a href="#">21</a> |
| <a href="#">8</a>  |
| <a href="#">4</a>  |
| <a href="#">19</a> |
| <a href="#">2</a>  |
| <a href="#">14</a> |
| <a href="#">1</a>  |
| <a href="#">8</a>  |
| <a href="#">19</a> |
| <a href="#">8</a>  |
| <a href="#">2</a>  |
| <a href="#">10</a> |
| <a href="#">7</a>  |
| <a href="#">12</a> |
| <a href="#">10</a> |
| <a href="#">15</a> |
| <a href="#">4</a>  |
| <a href="#">1</a>  |
| <a href="#">4</a>  |
| <a href="#">7</a>  |
| <a href="#">19</a> |
| <a href="#">9</a>  |
| <a href="#">27</a> |
| <a href="#">5</a>  |
| <a href="#">2</a>  |
| <a href="#">1</a>  |
| <a href="#">13</a> |
| <a href="#">28</a> |
| <a href="#">27</a> |
| <a href="#">19</a> |
| <a href="#">10</a> |
| <a href="#">8</a>  |
| <a href="#">10</a> |
| <a href="#">4</a>  |
| <a href="#">9</a>  |
| <a href="#">19</a> |
| <a href="#">3</a>  |
| <a href="#">3</a>  |

|      |       |          |          |          |        |         |   |   |
|------|-------|----------|----------|----------|--------|---------|---|---|
| 3804 | 23.03 | 373.1204 | 375.1284 | 278.1242 | 2.0080 | 1.0E+04 | 2 | 2 |
| 3805 | 23.03 | 699.3705 | 701.3795 | 465.3122 | 2.0090 | 1.4E+04 | 1 | 1 |
| 3808 | 23.04 | 431.1036 | 433.1088 | 197.0453 | 2.0052 | 6.6E+03 | 1 | 1 |
| 3810 | 23.05 | 392.1642 | 394.1708 | 158.1059 | 2.0066 | 1.3E+04 | 1 | 1 |
| 3818 | 23.07 | 697.3621 | 699.3697 | 463.3038 | 2.0076 | 9.3E+03 | 1 | 1 |
| 3824 | 23.08 | 725.4323 | 727.4347 | 491.3740 | 2.0023 | 1.1E+04 | 1 | 1 |
| 3825 | 23.08 | 747.4143 | 749.4155 | 513.3560 | 2.0012 | 6.5E+04 | 1 | 1 |
| 3835 | 23.11 | 640.2084 | 642.2102 | 406.1501 | 2.0017 | 1.3E+04 | 1 | 1 |
| 3837 | 23.11 | 639.1511 | 641.1533 | 405.0928 | 2.0022 | 1.2E+04 | 1 | 1 |
| 3844 | 23.12 | 603.1581 | 605.1580 | 369.0998 | 1.9999 | 1.9E+04 | 1 | 1 |
| 3846 | 23.13 | 697.3660 | 699.3715 | 463.3077 | 2.0055 | 1.0E+04 | 1 | 1 |
| 3847 | 23.13 | 484.2146 | 486.2213 | 250.1563 | 2.0067 | 6.2E+03 | 1 | 1 |
| 3852 | 23.13 | 301.0761 | 303.0821 | 134.0355 | 2.0060 | 1.3E+04 | 2 | 2 |
| 3858 | 23.15 | 761.3709 | 763.3753 | 527.3125 | 2.0044 | 7.4E+03 | 1 | 1 |
| 3861 | 23.17 | 757.3530 | 759.3592 | 523.2947 | 2.0062 | 6.8E+03 | 1 | 1 |
| 3868 | 23.19 | 699.3727 | 701.3813 | 465.3144 | 2.0086 | 1.1E+04 | 1 | 1 |
| 3871 | 23.19 | 359.1063 | 361.1123 | 250.0960 | 2.0060 | 1.3E+04 | 2 | 2 |
| 3872 | 23.20 | 328.1035 | 330.1122 | 188.0903 | 2.0087 | 1.4E+04 | 2 | 2 |
| 3879 | 23.22 | 699.3174 | 701.3196 | 465.2590 | 2.0022 | 1.2E+04 | 1 | 1 |
| 3884 | 23.24 | 697.3662 | 699.3719 | 463.3079 | 2.0057 | 1.2E+04 | 1 | 1 |
| 3886 | 23.25 | 753.3552 | 755.3573 | 519.2969 | 2.0021 | 9.0E+03 | 1 | 1 |
| 3888 | 23.25 | 721.2990 | 723.3005 | 487.2406 | 2.0015 | 1.4E+04 | 1 | 1 |
| 3889 | 23.26 | 437.1564 | 439.1605 | 203.0981 | 2.0041 | 1.2E+04 | 1 | 1 |
| 3891 | 23.26 | 759.3552 | 761.3601 | 525.2969 | 2.0050 | 6.9E+03 | 1 | 1 |
| 3893 | 23.27 | 759.3630 | 761.3705 | 525.3047 | 2.0075 | 2.1E+04 | 1 | 1 |
| 3894 | 23.28 | 652.1965 | 654.1997 | 418.1382 | 2.0032 | 8.5E+03 | 1 | 1 |
| 3900 | 23.32 | 397.1572 | 399.1634 | 163.0989 | 2.0062 | 9.8E+03 | 1 | 1 |
| 3903 | 23.34 | 761.3694 | 763.3727 | 527.3111 | 2.0033 | 9.4E+03 | 1 | 1 |
| 3904 | 23.35 | 699.3728 | 701.3817 | 465.3145 | 2.0089 | 1.0E+04 | 1 | 1 |
| 3906 | 23.35 | 466.2153 | 468.2205 | 232.1570 | 2.0051 | 1.3E+04 | 1 | 1 |
| 3911 | 23.38 | 759.3559 | 761.3557 | 525.2976 | 1.9998 | 6.8E+03 | 1 | 1 |
| 3917 | 23.43 | 759.3623 | 761.3707 | 525.3040 | 2.0084 | 1.1E+04 | 1 | 1 |
| 3918 | 23.43 | 761.3670 | 763.3680 | 527.3087 | 2.0010 | 1.1E+04 | 1 | 1 |
| 3925 | 23.47 | 360.1138 | 362.1198 | 252.1110 | 2.0060 | 1.1E+04 | 2 | 2 |
| 3926 | 23.47 | 697.3653 | 699.3728 | 463.3070 | 2.0076 | 8.6E+03 | 1 | 1 |
| 3929 | 23.48 | 757.3497 | 759.3606 | 523.2914 | 2.0109 | 7.5E+03 | 1 | 1 |
| 3931 | 23.51 | 761.3713 | 763.3731 | 527.3130 | 2.0018 | 1.1E+04 | 1 | 1 |
| 3934 | 23.52 | 313.0765 | 315.0836 | 158.0364 | 2.0071 | 1.1E+04 | 2 | 2 |
| 3939 | 23.53 | 759.3556 | 761.3599 | 525.2972 | 2.0044 | 6.6E+03 | 1 | 1 |
| 3941 | 23.55 | 387.0892 | 389.0953 | 153.0309 | 2.0061 | 2.3E+04 | 1 | 1 |
| 3946 | 23.58 | 757.3482 | 759.3611 | 523.2899 | 2.0130 | 6.2E+03 | 1 | 1 |
| 3949 | 23.62 | 699.3711 | 701.3780 | 465.3128 | 2.0069 | 1.3E+04 | 1 | 1 |
| 3952 | 23.66 | 699.3709 | 701.3823 | 465.3125 | 2.0114 | 1.1E+04 | 1 | 1 |
| 3954 | 23.68 | 306.0614 | 308.0680 | 144.0061 | 2.0067 | 1.2E+04 | 2 | 2 |
| 3955 | 23.69 | 374.1288 | 376.1366 | 140.0705 | 2.0078 | 9.8E+03 | 1 | 1 |
| 3957 | 23.69 | 458.1982 | 460.2058 | 224.1399 | 2.0076 | 9.5E+03 | 1 | 1 |
| 3958 | 23.71 | 761.3707 | 763.3720 | 527.3124 | 2.0013 | 1.1E+04 | 1 | 1 |
| 3960 | 23.72 | 697.3617 | 699.3709 | 463.3034 | 2.0092 | 1.0E+04 | 1 | 1 |

|           |
|-----------|
| <u>2</u>  |
| <u>4</u>  |
| <u>7</u>  |
| <u>6</u>  |
| <u>2</u>  |
| <u>2</u>  |
| <u>1</u>  |
| <u>7</u>  |
| <u>1</u>  |
| <u>2</u>  |
| <u>17</u> |
| <u>1</u>  |
| <u>1</u>  |
| <u>1</u>  |
| <u>2</u>  |
| <u>15</u> |
| <u>3</u>  |
| <u>4</u>  |
| <u>17</u> |
| <u>22</u> |
| <u>1</u>  |
| <u>7</u>  |
| <u>5</u>  |
| <u>9</u>  |
| <u>4</u>  |
| <u>16</u> |
| <u>3</u>  |
| <u>2</u>  |
| <u>1</u>  |
| <u>5</u>  |
| <u>4</u>  |
| <u>3</u>  |
| <u>8</u>  |
| <u>17</u> |
| <u>9</u>  |
| <u>2</u>  |
| <u>1</u>  |
| <u>5</u>  |
| <u>2</u>  |
| <u>9</u>  |
| <u>2</u>  |
| <u>4</u>  |
| <u>5</u>  |
| <u>7</u>  |
| <u>2</u>  |
| <u>2</u>  |
| <u>2</u>  |

|      |       |          |          |          |        |         |   |   |                    |
|------|-------|----------|----------|----------|--------|---------|---|---|--------------------|
| 3961 | 23.72 | 759.3626 | 761.3696 | 525.3043 | 2.0070 | 1.6E+04 | 1 | 1 | <a href="#">9</a>  |
| 3962 | 23.73 | 428.0650 | 430.0698 | 194.0067 | 2.0048 | 9.4E+03 | 1 | 1 | <a href="#">1</a>  |
| 3963 | 23.74 | 374.1295 | 376.1344 | 280.1423 | 2.0049 | 1.5E+04 | 2 | 2 | <a href="#">11</a> |
| 3965 | 23.78 | 699.3711 | 701.3808 | 465.3128 | 2.0096 | 9.0E+03 | 1 | 1 | <a href="#">2</a>  |
| 3969 | 23.85 | 699.3720 | 701.3845 | 465.3137 | 2.0125 | 1.1E+04 | 1 | 1 | <a href="#">2</a>  |
| 3974 | 23.86 | 432.1215 | 434.1273 | 198.0632 | 2.0058 | 2.6E+04 | 1 | 1 | <a href="#">20</a> |
| 3975 | 23.86 | 507.1548 | 509.1581 | 273.0965 | 2.0033 | 1.3E+04 | 1 | 1 | <a href="#">40</a> |
| 3979 | 23.89 | 639.3329 | 641.3371 | 405.2746 | 2.0042 | 1.7E+04 | 1 | 1 | <a href="#">6</a>  |
| 3981 | 23.91 | 697.3646 | 699.3715 | 463.3063 | 2.0069 | 9.9E+03 | 1 | 1 | <a href="#">19</a> |
| 3985 | 23.95 | 759.3635 | 761.3702 | 525.3052 | 2.0067 | 1.1E+04 | 1 | 1 | <a href="#">9</a>  |
| 3986 | 23.96 | 363.1732 | 365.1799 | 129.1149 | 2.0067 | 3.9E+04 | 1 | 1 | <a href="#">10</a> |
| 3987 | 23.97 | 988.4361 | 990.4440 | 754.3778 | 2.0079 | 1.5E+04 | 1 | 1 | <a href="#">1</a>  |
| 3990 | 23.99 | 567.2093 | 571.2228 | 100.0999 | 4.0136 | 2.0E+04 | 1 | 2 | <a href="#">2</a>  |
| 3991 | 23.99 | 431.1032 | 433.1083 | 197.0449 | 2.0051 | 4.5E+04 | 1 | 1 | <a href="#">7</a>  |
| 3992 | 23.99 | 349.1637 | 351.1715 | 230.2108 | 2.0078 | 1.7E+04 | 2 | 2 | <a href="#">2</a>  |
| 3993 | 24.00 | 488.6838 | 490.6934 | 509.2511 | 2.0096 | 7.2E+03 | 2 | 2 | <a href="#">2</a>  |
| 3994 | 24.01 | 276.0926 | 278.1015 | 84.0685  | 2.0089 | 7.0E+03 | 2 | 2 | <a href="#">2</a>  |
| 4000 | 24.02 | 695.3478 | 697.3597 | 461.2894 | 2.0119 | 1.1E+04 | 1 | 1 | <a href="#">19</a> |
| 4002 | 24.04 | 348.0901 | 350.0976 | 114.0317 | 2.0075 | 9.1E+03 | 1 | 1 | <a href="#">28</a> |
| 4009 | 24.08 | 431.1035 | 433.1098 | 197.0452 | 2.0062 | 4.2E+04 | 1 | 1 | <a href="#">7</a>  |
| 4010 | 24.08 | 717.1796 | 721.1924 | 250.0703 | 4.0127 | 7.0E+03 | 1 | 2 | <a href="#">13</a> |
| 4014 | 24.11 | 699.3723 | 701.3817 | 465.3140 | 2.0093 | 8.8E+03 | 1 | 1 | <a href="#">2</a>  |
| 4016 | 24.12 | 474.1942 | 476.2041 | 480.2718 | 2.0099 | 1.5E+04 | 2 | 2 | <a href="#">23</a> |
| 4021 | 24.13 | 625.2621 | 629.2762 | 158.1528 | 4.0141 | 1.2E+04 | 1 | 2 | <a href="#">3</a>  |
| 4023 | 24.14 | 695.3491 | 697.3584 | 461.2908 | 2.0093 | 1.6E+04 | 1 | 1 | <a href="#">19</a> |
| 4026 | 24.16 | 332.5588 | 334.5643 | 197.0009 | 2.0055 | 2.6E+04 | 2 | 2 | <a href="#">1</a>  |
| 4027 | 24.16 | 944.4095 | 946.4196 | 710.3512 | 2.0101 | 1.2E+04 | 1 | 1 | <a href="#">2</a>  |
| 4028 | 24.16 | 759.3610 | 761.3708 | 525.3027 | 2.0097 | 8.0E+03 | 1 | 1 | <a href="#">4</a>  |
| 4030 | 24.17 | 363.1732 | 365.1795 | 129.1148 | 2.0063 | 1.6E+04 | 1 | 1 | <a href="#">10</a> |
| 4031 | 24.17 | 331.5593 | 333.5659 | 195.0020 | 2.0066 | 2.1E+04 | 2 | 2 | <a href="#">2</a>  |
| 4039 | 24.23 | 729.3562 | 731.3610 | 495.2979 | 2.0047 | 6.4E+03 | 1 | 1 | <a href="#">13</a> |
| 4041 | 24.25 | 567.2089 | 571.2223 | 100.0996 | 4.0133 | 9.9E+03 | 1 | 2 | <a href="#">2</a>  |
| 4042 | 24.25 | 653.1664 | 655.1682 | 419.1081 | 2.0017 | 1.3E+04 | 1 | 1 | <a href="#">5</a>  |
| 4044 | 24.26 | 759.3624 | 761.3708 | 525.3040 | 2.0084 | 7.8E+03 | 1 | 1 | <a href="#">4</a>  |
| 4046 | 24.28 | 697.3571 | 699.3720 | 463.2988 | 2.0149 | 7.3E+03 | 1 | 1 | <a href="#">4</a>  |
| 4047 | 24.28 | 329.0792 | 331.0856 | 190.0417 | 2.0064 | 1.4E+04 | 2 | 2 | <a href="#">2</a>  |
| 4051 | 24.30 | 388.1114 | 390.1157 | 154.0531 | 2.0043 | 8.4E+03 | 1 | 1 | <a href="#">1</a>  |
| 4052 | 24.30 | 388.1054 | 390.1134 | 154.0471 | 2.0080 | 6.3E+03 | 1 | 1 | <a href="#">2</a>  |
| 4061 | 24.34 | 620.1550 | 624.1634 | 153.0457 | 4.0083 | 9.8E+03 | 1 | 2 | <a href="#">4</a>  |
| 4062 | 24.35 | 699.3719 | 701.3820 | 465.3136 | 2.0101 | 6.8E+03 | 1 | 1 | <a href="#">2</a>  |
| 4064 | 24.37 | 900.3848 | 902.3917 | 666.3265 | 2.0069 | 6.5E+03 | 1 | 1 | <a href="#">1</a>  |
| 4065 | 24.40 | 441.1809 | 443.1874 | 207.1226 | 2.0065 | 1.9E+04 | 1 | 1 | <a href="#">3</a>  |
| 4069 | 24.46 | 556.1293 | 558.1344 | 322.0710 | 2.0051 | 4.4E+04 | 1 | 1 | <a href="#">2</a>  |
| 4073 | 24.47 | 695.3500 | 697.3591 | 461.2917 | 2.0091 | 7.9E+03 | 1 | 1 | <a href="#">16</a> |
| 4076 | 24.49 | 759.3632 | 761.3711 | 525.3048 | 2.0079 | 1.2E+04 | 1 | 1 | <a href="#">9</a>  |
| 4080 | 24.52 | 697.3617 | 699.3726 | 463.3033 | 2.0110 | 7.7E+03 | 1 | 1 | <a href="#">2</a>  |
| 4084 | 24.54 | 428.0645 | 430.0702 | 194.0062 | 2.0056 | 7.0E+04 | 1 | 1 | <a href="#">1</a>  |
| 4085 | 24.55 | 450.1583 | 452.1631 | 216.1000 | 2.0048 | 1.2E+04 | 1 | 1 | <a href="#">10</a> |

|      |       |          |          |          |        |         |   |   |
|------|-------|----------|----------|----------|--------|---------|---|---|
| 4087 | 24.57 | 474.1940 | 476.2035 | 480.2714 | 2.0094 | 1.1E+04 | 2 | 2 |
| 4091 | 24.61 | 431.1030 | 433.1091 | 197.0447 | 2.0062 | 3.2E+04 | 1 | 1 |
| 4092 | 24.61 | 759.3609 | 761.3714 | 525.3026 | 2.0105 | 6.2E+03 | 1 | 1 |
| 4093 | 24.62 | 695.3488 | 697.3610 | 461.2905 | 2.0122 | 9.1E+03 | 1 | 1 |
| 4098 | 24.70 | 357.1376 | 359.1435 | 123.0793 | 2.0059 | 1.6E+04 | 1 | 1 |
| 4099 | 24.70 | 590.1889 | 594.2022 | 123.0796 | 4.0133 | 9.4E+03 | 1 | 2 |
| 4101 | 24.70 | 759.3621 | 761.3703 | 525.3038 | 2.0083 | 9.4E+03 | 1 | 1 |
| 4104 | 24.71 | 530.6942 | 532.7033 | 593.2719 | 2.0091 | 7.7E+03 | 2 | 2 |
| 4110 | 24.72 | 485.1242 | 487.1329 | 251.0659 | 2.0087 | 1.1E+04 | 1 | 1 |
| 4111 | 24.73 | 356.5946 | 358.6011 | 245.0725 | 2.0066 | 3.0E+04 | 2 | 2 |
| 4112 | 24.73 | 357.5935 | 359.6003 | 247.0703 | 2.0068 | 8.1E+03 | 2 | 2 |
| 4116 | 24.75 | 810.3277 | 814.3363 | 343.2184 | 4.0086 | 7.2E+03 | 1 | 2 |
| 4121 | 24.76 | 451.1723 | 453.1773 | 217.1140 | 2.0050 | 1.2E+04 | 1 | 1 |
| 4122 | 24.77 | 601.1490 | 603.1590 | 367.0906 | 2.0100 | 8.8E+03 | 1 | 1 |
| 4127 | 24.79 | 984.3650 | 988.3839 | 517.2557 | 4.0189 | 1.6E+04 | 1 | 2 |
| 4130 | 24.79 | 473.1894 | 475.1999 | 239.1310 | 2.0105 | 2.4E+04 | 1 | 1 |
| 4133 | 24.80 | 472.1899 | 474.1960 | 238.1315 | 2.0062 | 6.0E+04 | 1 | 1 |
| 4136 | 24.81 | 355.1636 | 357.1700 | 242.2106 | 2.0063 | 1.1E+05 | 2 | 2 |
| 4148 | 24.83 | 349.1641 | 351.1701 | 230.2116 | 2.0060 | 1.1E+04 | 2 | 2 |
| 4160 | 24.91 | 697.3621 | 699.3704 | 463.3038 | 2.0083 | 9.9E+03 | 1 | 1 |
| 4171 | 25.00 | 759.3629 | 761.3695 | 525.3046 | 2.0065 | 8.8E+03 | 1 | 1 |
| 4175 | 25.02 | 416.6560 | 418.6623 | 365.1953 | 2.0063 | 6.9E+03 | 2 | 2 |
| 4176 | 25.03 | 677.1801 | 679.1877 | 443.1217 | 2.0077 | 8.1E+03 | 1 | 1 |
| 4177 | 25.04 | 680.1909 | 682.1922 | 446.1326 | 2.0013 | 1.5E+04 | 1 | 1 |
| 4182 | 25.07 | 611.2453 | 613.2486 | 377.1869 | 2.0034 | 9.6E+03 | 1 | 1 |
| 4190 | 25.12 | 579.1878 | 581.1903 | 345.1295 | 2.0025 | 1.3E+04 | 1 | 1 |
| 4193 | 25.12 | 300.0804 | 302.0840 | 132.0442 | 2.0036 | 7.7E+03 | 2 | 2 |
| 4196 | 25.13 | 557.2070 | 559.2110 | 323.1487 | 2.0040 | 1.5E+04 | 1 | 1 |
| 4197 | 25.13 | 570.2151 | 572.2189 | 336.1568 | 2.0038 | 6.2E+03 | 1 | 1 |
| 4200 | 25.13 | 452.1877 | 454.1944 | 218.1294 | 2.0066 | 8.4E+03 | 1 | 1 |
| 4202 | 25.13 | 611.2476 | 615.2587 | 144.1383 | 4.0111 | 1.1E+04 | 1 | 2 |
| 4203 | 25.14 | 644.2081 | 646.2106 | 410.1497 | 2.0025 | 9.6E+03 | 1 | 1 |
| 4204 | 25.14 | 323.1064 | 325.1127 | 178.0961 | 2.0064 | 3.4E+04 | 2 | 2 |
| 4207 | 25.15 | 759.3627 | 761.3720 | 525.3043 | 2.0094 | 8.3E+03 | 1 | 1 |
| 4208 | 25.15 | 277.1004 | 279.1086 | 86.0842  | 2.0082 | 3.0E+04 | 2 | 2 |
| 4209 | 25.16 | 647.2174 | 649.2189 | 413.1590 | 2.0015 | 2.7E+04 | 1 | 1 |
| 4212 | 25.18 | 424.1618 | 426.1701 | 380.2070 | 2.0083 | 9.5E+03 | 2 | 2 |
| 4215 | 25.21 | 431.1039 | 433.1099 | 197.0455 | 2.0060 | 1.0E+04 | 1 | 1 |
| 4218 | 25.22 | 664.2577 | 666.2636 | 430.1994 | 2.0059 | 1.4E+04 | 1 | 1 |
| 4223 | 25.27 | 452.1883 | 454.1942 | 218.1299 | 2.0060 | 2.2E+04 | 1 | 1 |
| 4225 | 25.29 | 530.1832 | 532.1921 | 296.1249 | 2.0089 | 9.0E+03 | 1 | 1 |
| 4227 | 25.30 | 759.3628 | 761.3706 | 525.3044 | 2.0078 | 8.0E+03 | 1 | 1 |
| 4229 | 25.31 | 287.5769 | 289.5831 | 107.0371 | 2.0063 | 8.2E+03 | 2 | 2 |
| 4230 | 25.32 | 467.1902 | 469.1993 | 233.1319 | 2.0091 | 6.8E+03 | 1 | 1 |
| 4231 | 25.33 | 431.1023 | 433.1097 | 197.0440 | 2.0074 | 9.2E+03 | 1 | 1 |
| 4233 | 25.36 | 466.1914 | 468.1957 | 464.2661 | 2.0043 | 9.3E+03 | 2 | 2 |
| 4242 | 25.37 | 359.1014 | 361.1092 | 250.0861 | 2.0078 | 6.9E+03 | 2 | 2 |
| 4245 | 25.38 | 388.1072 | 390.1137 | 154.0488 | 2.0065 | 6.4E+04 | 1 | 1 |

|                    |
|--------------------|
| <a href="#">23</a> |
| <a href="#">7</a>  |
| <a href="#">4</a>  |
| <a href="#">19</a> |
| <a href="#">3</a>  |
| <a href="#">3</a>  |
| <a href="#">4</a>  |
| <a href="#">2</a>  |
| <a href="#">15</a> |
| <a href="#">6</a>  |
| <a href="#">12</a> |
| <a href="#">1</a>  |
| <a href="#">4</a>  |
| <a href="#">4</a>  |
| <a href="#">3</a>  |
| <a href="#">3</a>  |
| <a href="#">1</a>  |
| <a href="#">2</a>  |
| <a href="#">2</a>  |
| <a href="#">2</a>  |
| <a href="#">2</a>  |
| <a href="#">1</a>  |
| <a href="#">1</a>  |
| <a href="#">5</a>  |
| <a href="#">2</a>  |
| <a href="#">4</a>  |
| <a href="#">8</a>  |
| <a href="#">1</a>  |
| <a href="#">1</a>  |
| <a href="#">3</a>  |
| <a href="#">3</a>  |
| <a href="#">8</a>  |
| <a href="#">9</a>  |
| <a href="#">1</a>  |
| <a href="#">2</a>  |
| <a href="#">1</a>  |
| <a href="#">7</a>  |
| <a href="#">6</a>  |
| <a href="#">1</a>  |
| <a href="#">7</a>  |
| <a href="#">9</a>  |
| <a href="#">5</a>  |
| <a href="#">2</a>  |
| <a href="#">5</a>  |
| <a href="#">1</a>  |
| <a href="#">1</a>  |
| <a href="#">10</a> |

|      |       |          |          |          |        |         |   |   |                    |
|------|-------|----------|----------|----------|--------|---------|---|---|--------------------|
| 4250 | 25.39 | 318.0793 | 320.0866 | 84.0209  | 2.0074 | 1.1E+04 | 1 | 1 | <a href="#">13</a> |
| 4254 | 25.39 | 473.6964 | 475.7060 | 479.2761 | 2.0096 | 2.2E+04 | 2 | 2 | <a href="#">2</a>  |
| 4255 | 25.39 | 969.3722 | 973.3923 | 502.2628 | 4.0201 | 8.1E+03 | 1 | 2 | <a href="#">1</a>  |
| 4257 | 25.39 | 605.1571 | 607.1610 | 371.0987 | 2.0039 | 2.0E+04 | 1 | 1 | <a href="#">6</a>  |
| 4280 | 25.41 | 753.2008 | 757.2142 | 286.0914 | 4.0134 | 7.4E+03 | 1 | 2 | <a href="#">7</a>  |
| 4294 | 25.43 | 464.2694 | 466.2757 | 230.2111 | 2.0063 | 8.3E+03 | 1 | 1 | <a href="#">2</a>  |
| 4295 | 25.44 | 933.3748 | 935.3870 | 699.3165 | 2.0122 | 6.2E+03 | 1 | 1 | <a href="#">5</a>  |
| 4299 | 25.46 | 349.1635 | 351.1700 | 230.2103 | 2.0065 | 7.0E+04 | 2 | 2 | <a href="#">2</a>  |
| 4302 | 25.47 | 466.1897 | 468.1962 | 232.1314 | 2.0065 | 3.7E+04 | 1 | 1 | <a href="#">12</a> |
| 4303 | 25.47 | 467.1899 | 469.2002 | 466.2631 | 2.0104 | 1.8E+04 | 2 | 2 | <a href="#">1</a>  |
| 4304 | 25.48 | 599.1520 | 601.1532 | 365.0937 | 2.0012 | 2.5E+04 | 1 | 1 | <a href="#">1</a>  |
| 4305 | 25.48 | 661.2012 | 665.2152 | 194.0919 | 4.0139 | 8.8E+03 | 1 | 2 | <a href="#">2</a>  |
| 4313 | 25.51 | 946.3840 | 950.4040 | 479.2747 | 4.0200 | 6.5E+03 | 1 | 2 | <a href="#">1</a>  |
| 4314 | 25.51 | 431.1037 | 433.1099 | 197.0454 | 2.0062 | 1.2E+04 | 1 | 1 | <a href="#">7</a>  |
| 4315 | 25.52 | 759.3638 | 761.3701 | 525.3055 | 2.0064 | 8.9E+03 | 1 | 1 | <a href="#">9</a>  |
| 4316 | 25.53 | 487.1798 | 489.1857 | 253.1215 | 2.0059 | 4.2E+04 | 1 | 1 | <a href="#">2</a>  |
| 4317 | 25.54 | 442.2039 | 444.2107 | 208.1456 | 2.0068 | 9.8E+03 | 1 | 1 | <a href="#">2</a>  |
| 4322 | 25.58 | 352.6095 | 354.6162 | 237.1024 | 2.0067 | 7.0E+03 | 2 | 2 | <a href="#">3</a>  |
| 4326 | 25.59 | 460.2143 | 462.2207 | 226.1560 | 2.0064 | 6.7E+03 | 1 | 1 | <a href="#">3</a>  |
| 4327 | 25.59 | 697.3639 | 699.3688 | 463.3056 | 2.0049 | 2.3E+04 | 1 | 1 | <a href="#">19</a> |
| 4330 | 25.62 | 663.2020 | 665.2100 | 429.1437 | 2.0080 | 1.3E+04 | 1 | 1 | <a href="#">2</a>  |
| 4334 | 25.63 | 530.1834 | 532.1901 | 296.1250 | 2.0068 | 2.8E+04 | 1 | 1 | <a href="#">7</a>  |
| 4335 | 25.64 | 664.2570 | 666.2625 | 430.1986 | 2.0055 | 1.6E+05 | 1 | 1 | <a href="#">6</a>  |
| 4336 | 25.65 | 720.2525 | 724.2645 | 253.1431 | 4.0120 | 8.4E+03 | 1 | 2 | <a href="#">8</a>  |
| 4338 | 25.66 | 460.1729 | 462.1827 | 452.2292 | 2.0098 | 1.0E+04 | 2 | 2 | <a href="#">4</a>  |
| 4340 | 25.68 | 717.4392 | 719.4406 | 483.3809 | 2.0014 | 1.4E+04 | 1 | 1 | <a href="#">1</a>  |
| 4343 | 25.73 | 967.4203 | 969.4304 | 733.3620 | 2.0101 | 2.0E+04 | 1 | 1 | <a href="#">1</a>  |
| 4347 | 25.80 | 431.1017 | 433.1090 | 197.0433 | 2.0074 | 1.0E+04 | 1 | 1 | <a href="#">5</a>  |
| 4348 | 25.80 | 697.3627 | 699.3707 | 463.3044 | 2.0079 | 2.9E+04 | 1 | 1 | <a href="#">19</a> |
| 4351 | 25.81 | 620.2433 | 622.2500 | 386.1850 | 2.0067 | 1.2E+04 | 1 | 1 | <a href="#">7</a>  |
| 4354 | 25.82 | 759.3630 | 761.3711 | 525.3046 | 2.0081 | 6.9E+03 | 1 | 1 | <a href="#">9</a>  |
| 4358 | 25.86 | 664.2567 | 666.2623 | 430.1983 | 2.0057 | 1.4E+05 | 1 | 1 | <a href="#">8</a>  |
| 4363 | 25.88 | 595.1757 | 597.1820 | 361.1174 | 2.0062 | 6.5E+03 | 1 | 1 | <a href="#">2</a>  |
| 4364 | 25.89 | 652.2255 | 656.2406 | 185.1161 | 4.0152 | 7.2E+03 | 1 | 2 | <a href="#">3</a>  |
| 4365 | 25.90 | 345.5573 | 347.5633 | 222.9980 | 2.0060 | 1.3E+04 | 2 | 2 | <a href="#">3</a>  |
| 4366 | 25.90 | 431.1033 | 433.1095 | 197.0450 | 2.0062 | 8.7E+03 | 1 | 1 | <a href="#">7</a>  |
| 4367 | 25.91 | 530.1832 | 532.1890 | 296.1248 | 2.0058 | 8.6E+03 | 1 | 1 | <a href="#">7</a>  |
| 4373 | 25.96 | 358.0970 | 360.1040 | 124.0387 | 2.0070 | 8.2E+03 | 1 | 1 | <a href="#">2</a>  |
| 4377 | 25.98 | 316.0525 | 318.0591 | 163.9885 | 2.0066 | 1.3E+04 | 2 | 2 | <a href="#">1</a>  |
| 4385 | 26.02 | 667.1890 | 671.2023 | 200.0796 | 4.0133 | 1.2E+04 | 1 | 2 | <a href="#">11</a> |
| 4389 | 26.02 | 518.2193 | 520.2266 | 284.1610 | 2.0074 | 8.7E+03 | 1 | 1 | <a href="#">3</a>  |
| 4393 | 26.03 | 530.1831 | 532.1896 | 296.1247 | 2.0066 | 9.2E+03 | 1 | 1 | <a href="#">18</a> |
| 4395 | 26.05 | 431.1036 | 433.1102 | 197.0453 | 2.0066 | 8.5E+03 | 1 | 1 | <a href="#">7</a>  |
| 4397 | 26.05 | 664.2569 | 666.2627 | 430.1986 | 2.0057 | 5.1E+04 | 1 | 1 | <a href="#">6</a>  |
| 4399 | 26.05 | 759.3647 | 761.3743 | 525.3064 | 2.0096 | 8.1E+03 | 1 | 1 | <a href="#">9</a>  |
| 4400 | 26.07 | 613.1478 | 615.1498 | 379.0895 | 2.0020 | 1.7E+04 | 1 | 1 | <a href="#">5</a>  |
| 4402 | 26.09 | 668.2041 | 670.2052 | 434.1458 | 2.0011 | 1.4E+04 | 1 | 1 | <a href="#">14</a> |
| 4403 | 26.09 | 635.1303 | 637.1332 | 401.0720 | 2.0028 | 1.4E+04 | 1 | 1 | <a href="#">5</a>  |

|      |       |          |          |          |        |         |   |   |                    |
|------|-------|----------|----------|----------|--------|---------|---|---|--------------------|
| 4405 | 26.09 | 671.2036 | 673.2057 | 437.1452 | 2.0021 | 9.9E+03 | 1 | 1 | <a href="#">18</a> |
| 4411 | 26.11 | 697.3636 | 699.3708 | 463.3053 | 2.0072 | 9.1E+03 | 1 | 1 | <a href="#">19</a> |
| 4412 | 26.11 | 671.2128 | 673.2165 | 437.1545 | 2.0037 | 1.2E+04 | 1 | 1 | <a href="#">7</a>  |
| 4414 | 26.12 | 706.3187 | 708.3224 | 472.2604 | 2.0037 | 1.0E+04 | 1 | 1 | <a href="#">19</a> |
| 4415 | 26.12 | 678.3241 | 680.3298 | 444.2658 | 2.0057 | 9.0E+03 | 1 | 1 | <a href="#">7</a>  |
| 4422 | 26.14 | 380.1285 | 382.1348 | 292.1404 | 2.0063 | 1.0E+04 | 2 | 2 | <a href="#">3</a>  |
| 4423 | 26.14 | 803.3331 | 805.3398 | 569.2748 | 2.0067 | 1.3E+04 | 1 | 1 | <a href="#">7</a>  |
| 4426 | 26.15 | 431.1031 | 433.1099 | 197.0447 | 2.0068 | 9.9E+03 | 1 | 1 | <a href="#">7</a>  |
| 4430 | 26.21 | 610.2214 | 612.2291 | 376.1630 | 2.0077 | 6.9E+03 | 1 | 1 | <a href="#">3</a>  |
| 4445 | 26.31 | 664.2561 | 666.2629 | 430.1978 | 2.0068 | 2.3E+04 | 1 | 1 | <a href="#">8</a>  |
| 4448 | 26.33 | 648.2616 | 650.2680 | 414.2033 | 2.0064 | 1.7E+04 | 1 | 1 | <a href="#">2</a>  |
| 4450 | 26.34 | 431.1034 | 433.1092 | 197.0450 | 2.0058 | 1.0E+04 | 1 | 1 | <a href="#">7</a>  |
| 4451 | 26.37 | 697.3626 | 699.3699 | 463.3043 | 2.0073 | 1.0E+04 | 1 | 1 | <a href="#">19</a> |
| 4461 | 26.43 | 668.3050 | 670.3078 | 434.2467 | 2.0028 | 9.1E+03 | 1 | 1 | <a href="#">1</a>  |
| 4464 | 26.45 | 309.0983 | 311.1040 | 150.0800 | 2.0057 | 6.9E+03 | 2 | 2 | <a href="#">8</a>  |
| 4466 | 26.50 | 393.1243 | 395.1308 | 318.1319 | 2.0065 | 7.2E+03 | 2 | 2 | <a href="#">5</a>  |
| 4468 | 26.51 | 689.1873 | 691.1884 | 455.1290 | 2.0011 | 1.6E+04 | 1 | 1 | <a href="#">6</a>  |
| 4470 | 26.51 | 779.3372 | 781.3420 | 545.2789 | 2.0048 | 4.4E+04 | 1 | 1 | <a href="#">3</a>  |
| 4473 | 26.55 | 723.3451 | 725.3509 | 489.2867 | 2.0058 | 1.8E+04 | 1 | 1 | <a href="#">12</a> |
| 4474 | 26.55 | 431.1039 | 433.1106 | 197.0456 | 2.0067 | 1.2E+04 | 1 | 1 | <a href="#">7</a>  |
| 4480 | 26.55 | 684.2316 | 686.2325 | 450.1733 | 2.0009 | 1.2E+04 | 1 | 1 | <a href="#">1</a>  |
| 4485 | 26.58 | 697.3630 | 699.3720 | 463.3046 | 2.0091 | 8.7E+03 | 1 | 1 | <a href="#">19</a> |
| 4490 | 26.58 | 725.3519 | 727.3549 | 491.2936 | 2.0030 | 9.9E+03 | 1 | 1 | <a href="#">2</a>  |
| 4501 | 26.65 | 424.1625 | 426.1720 | 380.2083 | 2.0095 | 3.1E+05 | 2 | 2 | <a href="#">3</a>  |
| 4508 | 26.68 | 283.1113 | 285.1176 | 49.0529  | 2.0064 | 5.6E+05 | 1 | 1 | <a href="#">3</a>  |
| 4511 | 26.70 | 423.1620 | 425.1686 | 189.1037 | 2.0066 | 8.9E+04 | 1 | 1 | <a href="#">2</a>  |
| 4514 | 26.72 | 639.1397 | 641.1404 | 405.0814 | 2.0006 | 1.1E+04 | 1 | 1 | <a href="#">2</a>  |
| 4516 | 26.72 | 662.2420 | 664.2496 | 428.1836 | 2.0076 | 9.0E+03 | 1 | 1 | <a href="#">1</a>  |
| 4517 | 26.73 | 639.1401 | 643.1529 | 172.0307 | 4.0128 | 1.1E+04 | 1 | 2 | <a href="#">1</a>  |
| 4520 | 26.74 | 421.1576 | 423.1609 | 187.0992 | 2.0033 | 5.1E+04 | 1 | 1 | <a href="#">2</a>  |
| 4522 | 26.75 | 620.2433 | 622.2499 | 386.1850 | 2.0066 | 7.6E+04 | 1 | 1 | <a href="#">7</a>  |
| 4523 | 26.76 | 689.1887 | 691.1908 | 455.1303 | 2.0021 | 1.3E+04 | 1 | 1 | <a href="#">4</a>  |
| 4528 | 26.79 | 589.1787 | 591.1801 | 355.1204 | 2.0013 | 1.1E+04 | 1 | 1 | <a href="#">1</a>  |
| 4529 | 26.79 | 567.1254 | 571.1394 | 100.0161 | 4.0140 | 1.0E+04 | 1 | 2 | <a href="#">16</a> |
| 4530 | 26.80 | 431.1031 | 433.1095 | 197.0447 | 2.0064 | 1.8E+04 | 1 | 1 | <a href="#">7</a>  |
| 4531 | 26.81 | 611.1603 | 613.1616 | 377.1020 | 2.0013 | 1.2E+04 | 1 | 1 | <a href="#">2</a>  |
| 4532 | 26.81 | 500.2463 | 502.2524 | 266.1879 | 2.0062 | 8.2E+03 | 1 | 1 | <a href="#">10</a> |
| 4539 | 26.85 | 697.3623 | 699.3704 | 463.3040 | 2.0080 | 1.1E+04 | 1 | 1 | <a href="#">19</a> |
| 4550 | 26.88 | 738.2906 | 740.2960 | 504.2322 | 2.0054 | 1.5E+04 | 1 | 1 | <a href="#">1</a>  |
| 4551 | 26.88 | 835.3039 | 837.3094 | 601.2456 | 2.0055 | 1.9E+04 | 1 | 1 | <a href="#">1</a>  |
| 4555 | 26.89 | 815.3290 | 817.3291 | 581.2707 | 2.0002 | 5.2E+05 | 1 | 1 | <a href="#">4</a>  |
| 4557 | 26.89 | 712.3017 | 714.3036 | 478.2434 | 2.0019 | 1.1E+04 | 1 | 1 | <a href="#">3</a>  |
| 4561 | 26.90 | 847.3217 | 851.3387 | 380.2124 | 4.0169 | 6.6E+03 | 1 | 2 | <a href="#">1</a>  |
| 4563 | 26.91 | 837.3107 | 839.3114 | 603.2524 | 2.0007 | 2.5E+04 | 1 | 1 | <a href="#">1</a>  |
| 4570 | 26.91 | 751.2049 | 755.2176 | 284.0956 | 4.0127 | 7.8E+03 | 1 | 2 | <a href="#">1</a>  |
| 4571 | 26.92 | 706.3142 | 708.3170 | 472.2559 | 2.0028 | 8.6E+03 | 1 | 1 | <a href="#">7</a>  |
| 4572 | 26.93 | 363.2098 | 365.2166 | 129.1515 | 2.0068 | 2.7E+05 | 1 | 1 | <a href="#">1</a>  |
| 4574 | 26.93 | 724.3291 | 726.3350 | 490.2708 | 2.0058 | 7.5E+03 | 1 | 1 | <a href="#">3</a>  |

|      |       |          |          |          |        |         |   |   |           |
|------|-------|----------|----------|----------|--------|---------|---|---|-----------|
| 4576 | 26.95 | 652.2717 | 654.2805 | 418.2134 | 2.0088 | 9.0E+03 | 1 | 1 | <u>6</u>  |
| 4580 | 26.97 | 514.1886 | 516.1955 | 280.1302 | 2.0069 | 7.0E+03 | 1 | 1 | <u>1</u>  |
| 4581 | 26.97 | 986.2535 | 990.2725 | 519.1441 | 4.0190 | 7.1E+03 | 1 | 2 | <u>1</u>  |
| 4582 | 26.98 | 664.2563 | 666.2626 | 430.1980 | 2.0063 | 3.8E+04 | 1 | 1 | <u>8</u>  |
| 4584 | 26.99 | 712.1821 | 716.1958 | 245.0728 | 4.0137 | 1.0E+04 | 1 | 2 | <u>6</u>  |
| 4585 | 26.99 | 735.3404 | 737.3493 | 501.2821 | 2.0089 | 1.5E+04 | 1 | 1 | <u>5</u>  |
| 4586 | 26.99 | 813.3229 | 815.3272 | 579.2646 | 2.0043 | 4.0E+05 | 1 | 1 | <u>5</u>  |
| 4587 | 26.99 | 711.3309 | 713.3421 | 477.2726 | 2.0112 | 1.0E+04 | 1 | 1 | <u>5</u>  |
| 4590 | 27.00 | 703.2038 | 705.2051 | 469.1455 | 2.0013 | 1.8E+04 | 1 | 1 | <u>4</u>  |
| 4591 | 27.00 | 946.2310 | 950.2500 | 479.1216 | 4.0190 | 8.3E+03 | 1 | 2 | <u>2</u>  |
| 4595 | 27.02 | 452.1757 | 454.1847 | 436.2348 | 2.0090 | 6.2E+03 | 2 | 2 | <u>2</u>  |
| 4598 | 27.04 | 711.1777 | 713.1801 | 477.1194 | 2.0024 | 1.9E+04 | 1 | 1 | <u>2</u>  |
| 4607 | 27.06 | 485.1247 | 487.1318 | 251.0663 | 2.0071 | 1.4E+04 | 1 | 1 | <u>14</u> |
| 4613 | 27.07 | 485.6238 | 487.6334 | 503.1310 | 2.0096 | 2.7E+04 | 2 | 2 | <u>13</u> |
| 4614 | 27.07 | 611.2826 | 613.2884 | 377.2243 | 2.0058 | 1.3E+04 | 1 | 1 | <u>1</u>  |
| 4616 | 27.08 | 572.1242 | 574.1281 | 338.0658 | 2.0039 | 4.6E+04 | 1 | 1 | <u>1</u>  |
| 4623 | 27.10 | 486.1249 | 488.1348 | 252.0666 | 2.0100 | 7.9E+03 | 1 | 1 | <u>1</u>  |
| 4628 | 27.14 | 416.1496 | 418.1535 | 182.0913 | 2.0038 | 7.5E+03 | 1 | 1 | <u>4</u>  |
| 4629 | 27.14 | 353.1065 | 355.1144 | 238.0963 | 2.0079 | 1.0E+04 | 2 | 2 | <u>22</u> |
| 4631 | 27.16 | 703.2052 | 705.2043 | 469.1469 | 1.9990 | 3.0E+04 | 1 | 1 | <u>1</u>  |
| 4632 | 27.16 | 828.5207 | 830.5227 | 594.4624 | 2.0020 | 6.6E+03 | 1 | 1 | <u>21</u> |
| 4635 | 27.16 | 275.5767 | 277.5833 | 83.0368  | 2.0065 | 8.0E+03 | 2 | 2 | <u>2</u>  |
| 4638 | 27.18 | 352.1084 | 354.1146 | 236.1001 | 2.0062 | 1.4E+04 | 2 | 2 | <u>13</u> |
| 4640 | 27.19 | 697.3667 | 699.3697 | 463.3084 | 2.0030 | 1.3E+04 | 1 | 1 | <u>17</u> |
| 4641 | 27.19 | 446.1985 | 448.2049 | 212.1401 | 2.0065 | 1.6E+04 | 1 | 1 | <u>1</u>  |
| 4642 | 27.19 | 601.1480 | 603.1494 | 367.0896 | 2.0014 | 9.9E+03 | 1 | 1 | <u>4</u>  |
| 4651 | 27.23 | 807.4359 | 809.4372 | 573.3776 | 2.0012 | 1.3E+05 | 1 | 1 | <u>7</u>  |
| 4654 | 27.24 | 470.1973 | 472.2044 | 236.1390 | 2.0070 | 1.8E+04 | 1 | 1 | <u>2</u>  |
| 4666 | 27.28 | 431.1037 | 433.1088 | 197.0453 | 2.0051 | 1.9E+04 | 1 | 1 | <u>7</u>  |
| 4667 | 27.28 | 757.3220 | 759.3251 | 523.2637 | 2.0031 | 2.8E+04 | 1 | 1 | <u>3</u>  |
| 4668 | 27.30 | 567.1615 | 569.1582 | 333.1032 | 1.9966 | 1.3E+04 | 1 | 1 | <u>2</u>  |
| 4669 | 27.30 | 891.2021 | 893.2011 | 657.1438 | 1.9990 | 1.2E+04 | 1 | 1 | <u>1</u>  |
| 4672 | 27.30 | 755.3170 | 757.3226 | 521.2586 | 2.0057 | 2.7E+04 | 1 | 1 | <u>2</u>  |
| 4674 | 27.31 | 697.3647 | 699.3731 | 463.3064 | 2.0084 | 1.0E+04 | 1 | 1 | <u>19</u> |
| 4677 | 27.34 | 523.1172 | 525.1228 | 289.0588 | 2.0057 | 6.3E+03 | 1 | 1 | <u>2</u>  |
| 4679 | 27.34 | 575.2925 | 577.2919 | 341.2341 | 1.9994 | 5.0E+04 | 1 | 1 | <u>4</u>  |
| 4680 | 27.35 | 784.4962 | 786.4971 | 550.4379 | 2.0009 | 6.6E+03 | 1 | 1 | <u>6</u>  |
| 4681 | 27.35 | 432.1624 | 434.1656 | 198.1040 | 2.0033 | 8.3E+03 | 1 | 1 | <u>1</u>  |
| 4684 | 27.36 | 614.2815 | 616.2838 | 380.2232 | 2.0023 | 2.4E+04 | 1 | 1 | <u>1</u>  |
| 4693 | 27.41 | 809.3467 | 811.3487 | 575.2884 | 2.0020 | 1.0E+04 | 1 | 1 | <u>4</u>  |
| 4700 | 27.43 | 611.1179 | 615.1307 | 144.0086 | 4.0128 | 8.7E+04 | 1 | 2 | <u>2</u>  |
| 4704 | 27.45 | 717.2189 | 719.2177 | 483.1606 | 1.9988 | 1.8E+04 | 1 | 1 | <u>9</u>  |
| 4706 | 27.47 | 611.2821 | 613.2886 | 377.2238 | 2.0065 | 1.7E+04 | 1 | 1 | <u>1</u>  |
| 4710 | 27.48 | 875.2524 | 877.2557 | 641.1941 | 2.0033 | 1.1E+04 | 1 | 1 | <u>1</u>  |
| 4713 | 27.50 | 438.1289 | 440.1422 | 408.1411 | 2.0134 | 1.7E+04 | 2 | 2 | <u>2</u>  |
| 4714 | 27.51 | 263.0850 | 265.0913 | 29.0267  | 2.0063 | 1.2E+04 | 1 | 1 | <u>1</u>  |
| 4718 | 27.51 | 436.1206 | 438.1305 | 404.1246 | 2.0099 | 2.6E+04 | 2 | 2 | <u>2</u>  |
| 4721 | 27.52 | 697.3631 | 699.3706 | 463.3048 | 2.0075 | 1.4E+04 | 1 | 1 | <u>19</u> |



|      |       |          |          |           |        |         |   |   |           |
|------|-------|----------|----------|-----------|--------|---------|---|---|-----------|
| 4724 | 27.53 | 431.1031 | 433.1103 | 197.0447  | 2.0072 | 1.5E+04 | 1 | 1 | <u>7</u>  |
| 4730 | 27.54 | 514.1883 | 516.1953 | 280.1300  | 2.0069 | 1.6E+04 | 1 | 1 | <u>1</u>  |
| 4731 | 27.55 | 695.3290 | 699.3451 | 228.2196  | 4.0161 | 2.8E+04 | 1 | 2 | <u>1</u>  |
| 4732 | 27.56 | 665.2884 | 667.2946 | 431.2301  | 2.0062 | 2.9E+04 | 1 | 1 | <u>3</u>  |
| 4733 | 27.57 | 756.3025 | 758.3070 | 522.2441  | 2.0046 | 1.3E+04 | 1 | 1 | <u>10</u> |
| 4734 | 27.57 | 562.7084 | 564.7199 | 657.3002  | 2.0115 | 8.3E+03 | 2 | 2 | <u>1</u>  |
| 4747 | 27.60 | 462.3408 | 464.3539 | 228.2825  | 2.0130 | 9.8E+03 | 1 | 1 | <u>1</u>  |
| 4755 | 27.61 | 485.1248 | 487.1315 | 251.0664  | 2.0067 | 2.3E+05 | 1 | 1 | <u>14</u> |
| 4759 | 27.61 | 318.0795 | 320.0860 | 84.0212   | 2.0065 | 3.8E+04 | 1 | 1 | <u>13</u> |
| 4761 | 27.61 | 736.1934 | 740.2065 | 269.0840  | 4.0131 | 5.4E+04 | 1 | 2 | <u>1</u>  |
| 4762 | 27.62 | 291.0739 | 293.0806 | 114.0312  | 2.0067 | 1.4E+04 | 2 | 2 | <u>28</u> |
| 4763 | 27.62 | 752.8136 | 754.8231 | 1037.5105 | 2.0095 | 6.7E+03 | 2 | 2 | <u>3</u>  |
| 4764 | 27.63 | 300.0801 | 302.0866 | 132.0435  | 2.0065 | 1.1E+06 | 2 | 2 | <u>4</u>  |
| 4769 | 27.65 | 485.6250 | 487.6342 | 503.1333  | 2.0092 | 3.0E+05 | 2 | 2 | <u>13</u> |
| 4770 | 27.65 | 737.1915 | 739.2042 | 503.1332  | 2.0127 | 4.3E+04 | 1 | 1 | <u>13</u> |
| 4772 | 27.65 | 706.3162 | 708.3214 | 472.2579  | 2.0052 | 9.2E+03 | 1 | 1 | <u>26</u> |
| 4776 | 27.69 | 696.4398 | 698.4441 | 462.3814  | 2.0043 | 9.1E+03 | 1 | 1 | <u>2</u>  |
| 4777 | 27.69 | 717.2212 | 719.2211 | 483.1629  | 1.9999 | 7.8E+03 | 1 | 1 | <u>2</u>  |
| 4780 | 27.70 | 740.2224 | 744.2392 | 273.1130  | 4.0168 | 1.2E+04 | 1 | 2 | <u>1</u>  |
| 4788 | 27.72 | 841.3164 | 843.3241 | 607.2581  | 2.0077 | 6.4E+03 | 1 | 1 | <u>14</u> |
| 4791 | 27.73 | 865.3060 | 867.3055 | 631.2477  | 1.9995 | 9.2E+03 | 1 | 1 | <u>1</u>  |
| 4793 | 27.74 | 810.2412 | 812.2477 | 576.1829  | 2.0065 | 7.0E+03 | 1 | 1 | <u>3</u>  |
| 4796 | 27.74 | 569.2692 | 571.2676 | 335.2109  | 1.9983 | 7.2E+04 | 1 | 1 | <u>2</u>  |
| 4802 | 27.76 | 736.1931 | 738.1948 | 502.1348  | 2.0017 | 1.9E+04 | 1 | 1 | <u>3</u>  |
| 4807 | 27.76 | 668.2277 | 670.2394 | 434.1694  | 2.0117 | 9.2E+03 | 1 | 1 | <u>1</u>  |
| 4810 | 27.77 | 576.2221 | 578.2201 | 342.1638  | 1.9980 | 1.1E+04 | 1 | 1 | <u>1</u>  |
| 4811 | 27.77 | 567.1589 | 569.1600 | 333.1006  | 2.0011 | 1.2E+04 | 1 | 1 | <u>8</u>  |
| 4815 | 27.78 | 670.2414 | 672.2513 | 436.1831  | 2.0099 | 8.5E+03 | 1 | 1 | <u>1</u>  |
| 4816 | 27.78 | 395.6332 | 397.6426 | 323.1497  | 2.0094 | 2.2E+04 | 2 | 2 | <u>8</u>  |
| 4818 | 27.79 | 843.3248 | 845.3248 | 609.2665  | 1.9999 | 9.1E+04 | 1 | 1 | <u>1</u>  |
| 4819 | 27.79 | 552.2067 | 554.2081 | 318.1484  | 2.0013 | 8.9E+03 | 1 | 1 | <u>1</u>  |
| 4823 | 27.79 | 581.2705 | 583.2723 | 347.2122  | 2.0018 | 1.2E+04 | 1 | 1 | <u>5</u>  |
| 4828 | 27.80 | 289.0761 | 291.0816 | 110.0355  | 2.0055 | 6.6E+03 | 2 | 2 | <u>1</u>  |
| 4834 | 27.82 | 574.2183 | 576.2186 | 340.1600  | 2.0002 | 1.4E+04 | 1 | 1 | <u>2</u>  |
| 4836 | 27.82 | 441.1447 | 443.1474 | 207.0863  | 2.0027 | 1.9E+04 | 1 | 1 | <u>1</u>  |
| 4838 | 27.83 | 648.2603 | 650.2664 | 414.2020  | 2.0061 | 5.3E+04 | 1 | 1 | <u>4</u>  |
| 4839 | 27.84 | 570.2194 | 572.2313 | 672.3222  | 2.0118 | 8.9E+03 | 2 | 2 | <u>6</u>  |
| 4840 | 27.84 | 581.1763 | 583.1736 | 347.1180  | 1.9973 | 1.5E+04 | 1 | 1 | <u>1</u>  |
| 4841 | 27.84 | 369.1024 | 371.1061 | 270.0881  | 2.0038 | 9.9E+03 | 2 | 2 | <u>9</u>  |
| 4842 | 27.84 | 556.2738 | 558.2777 | 322.2155  | 2.0038 | 2.8E+04 | 1 | 1 | <u>52</u> |
| 4845 | 27.85 | 663.3923 | 665.3968 | 429.3340  | 2.0044 | 2.8E+04 | 1 | 1 | <u>1</u>  |
| 4849 | 27.87 | 549.1733 | 551.1726 | 315.1150  | 1.9993 | 2.3E+04 | 1 | 1 | <u>1</u>  |
| 4853 | 27.88 | 682.3619 | 684.3648 | 448.3036  | 2.0029 | 3.4E+04 | 1 | 1 | <u>4</u>  |
| 4857 | 27.90 | 456.2200 | 458.2261 | 222.1617  | 2.0061 | 8.4E+03 | 1 | 1 | <u>2</u>  |
| 4859 | 27.95 | 735.3403 | 737.3465 | 501.2820  | 2.0062 | 2.8E+04 | 1 | 1 | <u>5</u>  |
| 4863 | 28.03 | 620.2323 | 622.2388 | 386.1740  | 2.0065 | 1.2E+05 | 1 | 1 | <u>2</u>  |
| 4866 | 28.03 | 683.3552 | 685.3552 | 449.2969  | 2.0000 | 2.5E+04 | 1 | 1 | <u>1</u>  |
| 4884 | 28.17 | 301.0786 | 303.0842 | 134.0406  | 2.0056 | 3.2E+04 | 2 | 2 | <u>3</u>  |

|      |       |          |          |          |        |         |   |   |
|------|-------|----------|----------|----------|--------|---------|---|---|
| 4887 | 28.18 | 736.1934 | 740.2084 | 269.0841 | 4.0150 | 3.7E+04 | 1 | 2 |
| 4888 | 28.20 | 739.2032 | 741.2040 | 505.1448 | 2.0009 | 1.6E+04 | 1 | 1 |
| 4893 | 28.23 | 576.2205 | 578.2228 | 342.1621 | 2.0023 | 7.2E+03 | 1 | 1 |
| 4897 | 28.25 | 476.6190 | 478.6291 | 485.1213 | 2.0101 | 6.7E+03 | 2 | 2 |
| 4898 | 28.25 | 737.1913 | 739.2038 | 503.1329 | 2.0126 | 8.1E+03 | 1 | 1 |
| 4899 | 28.26 | 458.1980 | 460.2042 | 224.1397 | 2.0062 | 3.4E+04 | 1 | 1 |
| 4901 | 28.26 | 648.2578 | 650.2664 | 414.1995 | 2.0086 | 3.3E+04 | 1 | 1 |
| 4904 | 28.27 | 697.3632 | 699.3713 | 463.3049 | 2.0081 | 8.2E+03 | 1 | 1 |
| 4906 | 28.27 | 446.1988 | 448.2043 | 212.1405 | 2.0055 | 8.3E+03 | 1 | 1 |
| 4907 | 28.27 | 668.2284 | 670.2367 | 434.1700 | 2.0083 | 2.6E+04 | 1 | 1 |
| 4914 | 28.29 | 670.2358 | 672.2458 | 436.1775 | 2.0099 | 1.2E+04 | 1 | 1 |
| 4915 | 28.29 | 595.1920 | 597.1933 | 361.1337 | 2.0013 | 8.0E+03 | 1 | 1 |
| 4921 | 28.52 | 617.2095 | 619.2202 | 383.1512 | 2.0107 | 4.3E+04 | 1 | 1 |
| 4942 | 28.68 | 457.1538 | 459.1606 | 223.0955 | 2.0068 | 5.7E+04 | 1 | 1 |
| 4953 | 28.75 | 583.2857 | 585.2845 | 349.2274 | 1.9988 | 2.0E+04 | 1 | 1 |
| 4954 | 28.76 | 528.2440 | 530.2455 | 294.1857 | 2.0015 | 1.3E+04 | 1 | 1 |
| 4962 | 28.83 | 697.3615 | 699.3738 | 463.3031 | 2.0123 | 6.7E+03 | 1 | 1 |
| 4975 | 28.90 | 735.3402 | 737.3480 | 501.2818 | 2.0078 | 8.3E+03 | 1 | 1 |
| 4978 | 28.91 | 738.3506 | 740.3544 | 504.2923 | 2.0038 | 1.5E+04 | 1 | 1 |
| 4980 | 28.93 | 583.2856 | 585.2844 | 349.2273 | 1.9988 | 3.7E+04 | 1 | 1 |
| 4984 | 28.94 | 563.1890 | 565.1905 | 329.1307 | 2.0015 | 1.1E+04 | 1 | 1 |
| 4988 | 28.95 | 856.2100 | 860.2311 | 389.1007 | 4.0210 | 7.5E+03 | 1 | 2 |
| 4991 | 28.96 | 723.3794 | 725.3865 | 489.3210 | 2.0071 | 7.4E+03 | 1 | 1 |
| 4995 | 28.97 | 689.3487 | 691.3503 | 455.2904 | 2.0016 | 1.6E+04 | 1 | 1 |
| 4997 | 28.98 | 621.1579 | 625.1711 | 154.0486 | 4.0132 | 1.2E+04 | 1 | 2 |
| 4999 | 28.98 | 757.3261 | 759.3325 | 523.2678 | 2.0064 | 9.9E+03 | 1 | 1 |
| 5000 | 28.99 | 444.2192 | 446.2253 | 210.1609 | 2.0061 | 1.3E+05 | 1 | 1 |
| 5001 | 28.99 | 737.3474 | 739.3512 | 503.2891 | 2.0038 | 2.0E+04 | 1 | 1 |
| 5005 | 29.01 | 561.1304 | 563.1317 | 327.0721 | 2.0013 | 1.1E+04 | 1 | 1 |
| 5009 | 29.02 | 456.2192 | 458.2256 | 222.1609 | 2.0063 | 1.7E+05 | 1 | 1 |
| 5012 | 29.03 | 659.2478 | 661.2531 | 425.1895 | 2.0053 | 9.0E+03 | 1 | 1 |
| 5014 | 29.04 | 757.4131 | 759.4174 | 523.3548 | 2.0044 | 1.3E+04 | 1 | 1 |
| 5015 | 29.04 | 686.2869 | 688.2881 | 452.2286 | 2.0012 | 2.5E+04 | 1 | 1 |
| 5018 | 29.06 | 684.2801 | 686.2851 | 450.2218 | 2.0050 | 4.2E+04 | 1 | 1 |
| 5023 | 29.07 | 569.2201 | 571.2253 | 335.1617 | 2.0052 | 1.9E+04 | 1 | 1 |
| 5025 | 29.08 | 519.1376 | 521.1356 | 285.0793 | 1.9980 | 1.4E+04 | 1 | 1 |
| 5041 | 29.12 | 405.0630 | 407.0659 | 171.0047 | 2.0029 | 6.5E+04 | 1 | 1 |
| 5045 | 29.13 | 379.1470 | 381.1516 | 145.0887 | 2.0046 | 9.3E+04 | 1 | 1 |
| 5047 | 29.13 | 453.1909 | 455.2014 | 438.2651 | 2.0106 | 6.2E+03 | 2 | 2 |
| 5049 | 29.13 | 686.2860 | 688.2882 | 452.2276 | 2.0022 | 1.9E+04 | 1 | 1 |
| 5055 | 29.15 | 486.2299 | 488.2362 | 252.1716 | 2.0063 | 1.2E+04 | 1 | 1 |
| 5057 | 29.15 | 319.0648 | 321.0705 | 170.0130 | 2.0057 | 4.4E+05 | 2 | 2 |
| 5065 | 29.18 | 542.2599 | 544.2607 | 308.2015 | 2.0009 | 2.7E+04 | 1 | 1 |
| 5067 | 29.19 | 723.3793 | 725.3864 | 489.3210 | 2.0071 | 6.5E+03 | 1 | 1 |
| 5069 | 29.20 | 838.3399 | 842.3527 | 371.2306 | 4.0128 | 7.5E+03 | 1 | 2 |
| 5075 | 29.23 | 700.3463 | 702.3549 | 466.2880 | 2.0086 | 1.3E+04 | 1 | 1 |
| 5077 | 29.24 | 768.3826 | 770.3955 | 534.3242 | 2.0129 | 6.5E+03 | 1 | 1 |
| 5082 | 29.25 | 556.2756 | 558.2753 | 322.2173 | 1.9997 | 1.0E+05 | 1 | 1 |

|                    |
|--------------------|
| <a href="#">1</a>  |
| <a href="#">4</a>  |
| <a href="#">2</a>  |
| <a href="#">3</a>  |
| <a href="#">13</a> |
| <a href="#">2</a>  |
| <a href="#">5</a>  |
| <a href="#">19</a> |
| <a href="#">8</a>  |
| <a href="#">1</a>  |
| <a href="#">3</a>  |
| <a href="#">2</a>  |
| <a href="#">2</a>  |
| <a href="#">19</a> |
| <a href="#">1</a>  |
| <a href="#">1</a>  |
| <a href="#">1</a>  |
| <a href="#">2</a>  |
| <a href="#">5</a>  |
| <a href="#">3</a>  |
| <a href="#">1</a>  |
| <a href="#">1</a>  |
| <a href="#">4</a>  |
| <a href="#">7</a>  |
| <a href="#">7</a>  |
| <a href="#">10</a> |
| <a href="#">6</a>  |
| <a href="#">1</a>  |
| <a href="#">4</a>  |
| <a href="#">5</a>  |
| <a href="#">2</a>  |
| <a href="#">10</a> |
| <a href="#">2</a>  |
| <a href="#">2</a>  |
| <a href="#">2</a>  |
| <a href="#">1</a>  |
| <a href="#">5</a>  |
| <a href="#">5</a>  |
| <a href="#">3</a>  |
| <a href="#">2</a>  |
| <a href="#">2</a>  |
| <a href="#">1</a>  |
| <a href="#">7</a>  |
| <a href="#">3</a>  |
| <a href="#">2</a>  |
| <a href="#">1</a>  |
| <a href="#">1</a>  |

|      |       |          |          |          |        |         |   |   |
|------|-------|----------|----------|----------|--------|---------|---|---|
| 5085 | 29.25 | 789.2989 | 791.3071 | 555.2406 | 2.0082 | 7.5E+03 | 1 | 1 |
| 5087 | 29.27 | 643.1344 | 645.1361 | 409.0761 | 2.0017 | 2.3E+04 | 1 | 1 |
| 5092 | 29.30 | 637.1225 | 641.1354 | 170.0132 | 4.0129 | 2.3E+04 | 1 | 2 |
| 5096 | 29.32 | 707.2506 | 709.2513 | 473.1923 | 2.0007 | 1.2E+04 | 1 | 1 |
| 5100 | 29.34 | 597.3020 | 599.3014 | 363.2437 | 1.9994 | 4.7E+04 | 1 | 1 |
| 5102 | 29.35 | 749.2285 | 751.2283 | 515.1702 | 1.9998 | 8.5E+03 | 1 | 1 |
| 5105 | 29.36 | 705.2520 | 707.2501 | 471.1937 | 1.9981 | 7.5E+04 | 1 | 1 |
| 5109 | 29.37 | 443.1352 | 445.1417 | 418.1538 | 2.0065 | 6.8E+03 | 2 | 2 |
| 5111 | 29.37 | 643.1338 | 645.1349 | 409.0755 | 2.0011 | 1.5E+04 | 1 | 1 |
| 5115 | 29.39 | 637.1225 | 641.1346 | 170.0131 | 4.0122 | 2.0E+04 | 1 | 2 |
| 5118 | 29.39 | 639.1221 | 643.1338 | 172.0127 | 4.0117 | 7.4E+03 | 1 | 2 |
| 5121 | 29.41 | 751.2274 | 753.2276 | 517.1691 | 2.0002 | 1.1E+04 | 1 | 1 |
| 5128 | 29.45 | 700.3464 | 702.3594 | 466.2881 | 2.0130 | 1.4E+04 | 1 | 1 |
| 5129 | 29.46 | 757.3232 | 759.3308 | 523.2649 | 2.0076 | 1.2E+04 | 1 | 1 |
| 5130 | 29.46 | 707.2508 | 709.2503 | 473.1925 | 1.9995 | 4.1E+04 | 1 | 1 |
| 5132 | 29.49 | 468.2211 | 470.2247 | 234.1627 | 2.0036 | 6.1E+03 | 1 | 1 |
| 5142 | 29.59 | 536.2241 | 538.2298 | 302.1658 | 2.0057 | 3.0E+04 | 1 | 1 |
| 5151 | 29.66 | 595.2867 | 597.2932 | 361.2284 | 2.0065 | 1.1E+05 | 1 | 1 |
| 5159 | 29.71 | 737.3477 | 739.3497 | 503.2894 | 2.0020 | 1.5E+04 | 1 | 1 |
| 5162 | 29.72 | 705.2518 | 707.2519 | 471.1935 | 2.0001 | 7.7E+03 | 1 | 1 |
| 5175 | 29.78 | 738.3600 | 742.3680 | 271.2507 | 4.0080 | 1.7E+04 | 1 | 2 |
| 5179 | 29.80 | 899.2880 | 903.2958 | 432.1786 | 4.0078 | 7.8E+03 | 1 | 2 |
| 5190 | 29.82 | 597.3001 | 599.3014 | 363.2417 | 2.0013 | 2.1E+04 | 1 | 1 |
| 5192 | 29.83 | 577.1937 | 581.2043 | 110.0844 | 4.0106 | 8.4E+03 | 1 | 2 |
| 5196 | 29.84 | 757.3227 | 759.3294 | 523.2643 | 2.0067 | 9.3E+03 | 1 | 1 |
| 5207 | 29.87 | 921.2664 | 925.2793 | 454.1570 | 4.0130 | 1.0E+04 | 1 | 2 |
| 5208 | 29.87 | 556.2757 | 558.2767 | 322.2174 | 2.0010 | 6.3E+04 | 1 | 1 |
| 5210 | 29.87 | 542.2597 | 544.2650 | 308.2014 | 2.0053 | 7.0E+03 | 1 | 1 |
| 5212 | 29.87 | 789.2996 | 791.3062 | 555.2413 | 2.0066 | 1.6E+04 | 1 | 1 |
| 5213 | 29.87 | 606.3458 | 608.3514 | 372.2875 | 2.0055 | 8.9E+03 | 1 | 1 |
| 5225 | 29.90 | 614.2807 | 616.2838 | 380.2224 | 2.0031 | 1.4E+04 | 1 | 1 |
| 5230 | 29.90 | 711.3332 | 713.3436 | 477.2749 | 2.0104 | 8.9E+03 | 1 | 1 |
| 5232 | 29.90 | 554.2219 | 556.2274 | 320.1635 | 2.0055 | 3.2E+04 | 1 | 1 |
| 5234 | 29.91 | 628.3269 | 630.3344 | 394.2686 | 2.0075 | 1.1E+04 | 1 | 1 |
| 5236 | 29.92 | 449.1573 | 451.1661 | 430.1979 | 2.0088 | 1.4E+04 | 2 | 2 |
| 5242 | 29.95 | 612.2742 | 614.2798 | 378.2159 | 2.0056 | 5.0E+04 | 1 | 1 |
| 5244 | 29.97 | 536.3411 | 538.3518 | 302.2827 | 2.0107 | 6.3E+03 | 1 | 1 |
| 5247 | 29.97 | 499.2250 | 501.2319 | 265.1667 | 2.0070 | 1.1E+04 | 1 | 1 |
| 5253 | 30.00 | 611.3177 | 613.3194 | 377.2593 | 2.0018 | 2.5E+04 | 1 | 1 |
| 5261 | 30.04 | 757.3217 | 759.3283 | 523.2634 | 2.0066 | 1.0E+04 | 1 | 1 |
| 5265 | 30.04 | 536.3545 | 538.3510 | 302.2962 | 1.9965 | 6.2E+03 | 1 | 1 |
| 5271 | 30.06 | 700.3465 | 702.3505 | 466.2881 | 2.0040 | 1.4E+04 | 1 | 1 |
| 5281 | 30.11 | 556.2750 | 558.2774 | 322.2167 | 2.0024 | 1.2E+04 | 1 | 1 |
| 5284 | 30.12 | 499.2257 | 501.2316 | 265.1673 | 2.0060 | 1.2E+04 | 1 | 1 |
| 5286 | 30.13 | 743.4553 | 745.4578 | 509.3970 | 2.0025 | 2.6E+04 | 1 | 1 |
| 5298 | 30.20 | 699.4145 | 701.4142 | 465.3562 | 1.9997 | 9.1E+03 | 1 | 1 |
| 5303 | 30.22 | 499.2248 | 501.2312 | 265.1665 | 2.0064 | 1.0E+04 | 1 | 1 |
| 5307 | 30.24 | 629.2650 | 631.2645 | 395.2066 | 1.9995 | 5.8E+04 | 1 | 1 |

|                    |
|--------------------|
| <a href="#">1</a>  |
| <a href="#">4</a>  |
| <a href="#">2</a>  |
| <a href="#">3</a>  |
| <a href="#">3</a>  |
| <a href="#">2</a>  |
| <a href="#">1</a>  |
| <a href="#">5</a>  |
| <a href="#">4</a>  |
| <a href="#">2</a>  |
| <a href="#">1</a>  |
| <a href="#">6</a>  |
| <a href="#">2</a>  |
| <a href="#">4</a>  |
| <a href="#">3</a>  |
| <a href="#">3</a>  |
| <a href="#">6</a>  |
| <a href="#">6</a>  |
| <a href="#">1</a>  |
| <a href="#">14</a> |
| <a href="#">1</a>  |
| <a href="#">13</a> |
| <a href="#">3</a>  |
| <a href="#">3</a>  |
| <a href="#">2</a>  |
| <a href="#">1</a>  |
| <a href="#">1</a>  |
| <a href="#">15</a> |
| <a href="#">1</a>  |
| <a href="#">10</a> |
| <a href="#">4</a>  |
| <a href="#">1</a>  |
| <a href="#">8</a>  |
| <a href="#">7</a>  |
| <a href="#">5</a>  |
| <a href="#">2</a>  |
| <a href="#">2</a>  |
| <a href="#">3</a>  |
| <a href="#">1</a>  |
| <a href="#">2</a>  |
| <a href="#">1</a>  |
| <a href="#">2</a>  |
| <a href="#">3</a>  |
| <a href="#">1</a>  |
| <a href="#">2</a>  |
| <a href="#">8</a>  |

|      |       |          |          |          |        |         |   |   |
|------|-------|----------|----------|----------|--------|---------|---|---|
| 5310 | 30.26 | 513.1230 | 515.1293 | 279.0646 | 2.0063 | 8.1E+03 | 1 | 1 |
| 5314 | 30.26 | 627.2588 | 629.2631 | 393.2005 | 2.0043 | 2.0E+05 | 1 | 1 |
| 5315 | 30.27 | 680.2668 | 682.2750 | 446.2085 | 2.0082 | 7.3E+03 | 1 | 1 |
| 5317 | 30.28 | 733.5170 | 735.5208 | 499.4587 | 2.0038 | 7.9E+03 | 1 | 1 |
| 5320 | 30.29 | 757.3235 | 759.3310 | 523.2652 | 2.0075 | 8.5E+03 | 1 | 1 |
| 5323 | 30.29 | 759.3308 | 761.3338 | 525.2725 | 2.0030 | 1.1E+04 | 1 | 1 |
| 5330 | 30.33 | 536.3546 | 538.3600 | 302.2963 | 2.0054 | 7.1E+03 | 1 | 1 |
| 5332 | 30.35 | 611.3176 | 613.3198 | 377.2593 | 2.0022 | 1.6E+04 | 1 | 1 |
| 5340 | 30.43 | 440.2244 | 442.2307 | 206.1661 | 2.0063 | 3.4E+06 | 1 | 1 |
| 5342 | 30.46 | 689.4907 | 691.4938 | 455.4324 | 2.0030 | 2.8E+04 | 1 | 1 |
| 5344 | 30.48 | 536.3563 | 538.3647 | 302.2980 | 2.0084 | 1.1E+04 | 1 | 1 |
| 5352 | 30.56 | 757.3244 | 759.3286 | 523.2661 | 2.0042 | 1.4E+04 | 1 | 1 |
| 5357 | 30.65 | 765.3017 | 767.3081 | 531.2433 | 2.0064 | 1.1E+04 | 1 | 1 |
| 5358 | 30.65 | 539.2600 | 541.2663 | 305.2017 | 2.0063 | 1.1E+04 | 1 | 1 |
| 5369 | 30.78 | 700.3467 | 702.3504 | 466.2884 | 2.0037 | 1.4E+04 | 1 | 1 |
| 5373 | 30.80 | 593.2706 | 595.2765 | 359.2123 | 2.0059 | 2.7E+04 | 1 | 1 |
| 5377 | 30.82 | 533.2819 | 535.2903 | 299.2235 | 2.0084 | 1.3E+04 | 1 | 1 |
| 5381 | 30.90 | 535.3204 | 537.3244 | 301.2621 | 2.0040 | 9.2E+03 | 1 | 1 |
| 5390 | 30.94 | 757.3236 | 759.3304 | 523.2653 | 2.0068 | 8.8E+03 | 1 | 1 |
| 5398 | 30.99 | 479.2685 | 481.2747 | 245.2102 | 2.0061 | 1.2E+04 | 1 | 1 |
| 5399 | 30.99 | 623.2815 | 625.2885 | 389.2232 | 2.0070 | 1.3E+04 | 1 | 1 |
| 5408 | 31.19 | 700.3464 | 702.3506 | 466.2881 | 2.0042 | 1.5E+04 | 1 | 1 |
| 5414 | 31.27 | 757.3226 | 759.3291 | 523.2643 | 2.0065 | 8.6E+03 | 1 | 1 |
| 5418 | 31.34 | 566.2627 | 568.2668 | 332.2044 | 2.0041 | 1.5E+04 | 1 | 1 |
| 5432 | 31.43 | 491.2935 | 493.3006 | 257.2351 | 2.0071 | 1.3E+04 | 1 | 1 |
| 5436 | 31.47 | 454.2403 | 456.2467 | 220.1820 | 2.0064 | 9.3E+03 | 1 | 1 |
| 5438 | 31.50 | 440.2250 | 442.2301 | 206.1667 | 2.0050 | 2.5E+04 | 1 | 1 |
| 5448 | 31.61 | 485.6245 | 487.6337 | 503.1324 | 2.0092 | 2.1E+04 | 2 | 2 |
| 5450 | 31.64 | 757.3246 | 759.3319 | 523.2662 | 2.0073 | 8.4E+03 | 1 | 1 |
| 5455 | 31.66 | 673.4975 | 675.5059 | 439.4392 | 2.0084 | 8.1E+03 | 1 | 1 |
| 5456 | 31.66 | 737.3464 | 739.3515 | 503.2880 | 2.0052 | 3.4E+04 | 1 | 1 |
| 5460 | 31.68 | 454.2407 | 456.2467 | 220.1824 | 2.0060 | 1.9E+04 | 1 | 1 |
| 5463 | 31.70 | 735.3405 | 737.3473 | 501.2822 | 2.0068 | 3.1E+04 | 1 | 1 |
| 5466 | 31.73 | 693.2838 | 695.2900 | 459.2254 | 2.0063 | 1.1E+04 | 1 | 1 |
| 5469 | 31.74 | 612.1782 | 614.1739 | 378.1199 | 1.9957 | 1.4E+04 | 1 | 1 |
| 5473 | 31.76 | 700.3454 | 702.3482 | 466.2870 | 2.0028 | 1.2E+04 | 1 | 1 |
| 5475 | 31.77 | 345.1389 | 347.1456 | 222.1611 | 2.0067 | 3.5E+04 | 2 | 2 |
| 5476 | 31.77 | 635.1478 | 637.1462 | 401.0894 | 1.9985 | 2.6E+04 | 1 | 1 |
| 5477 | 31.77 | 759.3326 | 761.3429 | 525.2742 | 2.0104 | 6.8E+03 | 1 | 1 |
| 5478 | 31.77 | 747.3234 | 749.3247 | 513.2651 | 2.0013 | 1.2E+04 | 1 | 1 |
| 5479 | 31.79 | 757.3220 | 759.3285 | 523.2636 | 2.0066 | 7.5E+03 | 1 | 1 |
| 5480 | 31.79 | 674.4816 | 676.4821 | 440.4232 | 2.0006 | 7.7E+03 | 1 | 1 |
| 5483 | 31.82 | 737.3488 | 739.3558 | 503.2904 | 2.0070 | 2.8E+04 | 1 | 1 |
| 5486 | 31.84 | 454.2410 | 456.2462 | 220.1827 | 2.0052 | 3.5E+04 | 1 | 1 |
| 5487 | 31.84 | 657.2588 | 659.2629 | 423.2005 | 2.0041 | 1.7E+04 | 1 | 1 |
| 5488 | 31.85 | 700.3463 | 702.3532 | 466.2880 | 2.0068 | 1.2E+04 | 1 | 1 |
| 5494 | 31.89 | 655.2533 | 657.2582 | 421.1949 | 2.0050 | 2.0E+04 | 1 | 1 |
| 5499 | 31.98 | 582.2371 | 584.2412 | 348.1787 | 2.0041 | 7.5E+03 | 1 | 1 |

|           |
|-----------|
| <u>1</u>  |
| <u>5</u>  |
| <u>6</u>  |
| <u>2</u>  |
| <u>4</u>  |
| <u>1</u>  |
| <u>1</u>  |
| <u>2</u>  |
| <u>1</u>  |
| <u>1</u>  |
| <u>1</u>  |
| <u>4</u>  |
| <u>1</u>  |
| <u>1</u>  |
| <u>2</u>  |
| <u>2</u>  |
| <u>7</u>  |
| <u>2</u>  |
| <u>4</u>  |
| <u>3</u>  |
| <u>6</u>  |
| <u>2</u>  |
| <u>3</u>  |
| <u>1</u>  |
| <u>4</u>  |
| <u>3</u>  |
| <u>1</u>  |
| <u>13</u> |
| <u>4</u>  |
| <u>3</u>  |
| <u>4</u>  |
| <u>3</u>  |
| <u>5</u>  |
| <u>1</u>  |
| <u>11</u> |
| <u>2</u>  |
| <u>2</u>  |
| <u>4</u>  |
| <u>5</u>  |
| <u>1</u>  |
| <u>3</u>  |
| <u>1</u>  |
| <u>6</u>  |
| <u>3</u>  |
| <u>5</u>  |
| <u>2</u>  |
| <u>6</u>  |
| <u>6</u>  |

|      |       |          |          |          |        |         |   |   |                    |
|------|-------|----------|----------|----------|--------|---------|---|---|--------------------|
| 5500 | 31.98 | 669.3328 | 671.3398 | 435.2744 | 2.0071 | 1.5E+04 | 1 | 1 | <a href="#">11</a> |
|------|-------|----------|----------|----------|--------|---------|---|---|--------------------|

Supplemental Table T4. List of significant metabolites.

| ID   | rt (min) | mz_light | mz       | nCharge | nTag | VIP Score<br>(large vs.<br>negative) | Fold Change<br>Medium vs.<br>Negative | Fold Change<br>Large vs.<br>Negative | Identification          | Source  |
|------|----------|----------|----------|---------|------|--------------------------------------|---------------------------------------|--------------------------------------|-------------------------|---------|
| 28   | 2.05     | 581.1207 | 347.0623 | 1       | 1    | 1.951                                | 0.64                                  | 0.51                                 | Adenosine monophosphate | Dns-lib |
| 129  | 2.92     | 424.1174 | 190.0591 | 1       | 1    | 2.384                                | 0.94                                  | 0.62                                 | Glycyl-Aspartate        | HMDB    |
| 156  | 3.14     | 518.1337 | 284.0753 | 1       | 1    | 2.260                                | 1.66                                  | 2.74                                 |                         |         |
| 164  | 3.22     | 422.2100 | 188.1517 | 1       | 1    | 2.391                                | 1.57                                  | 2.58                                 |                         |         |
| 180  | 3.36     | 535.1729 | 301.1146 | 1       | 1    | 2.358                                | 1.05                                  | 0.69                                 |                         |         |
| 919  | 6.51     | 627.3779 | 393.3195 | 1       | 1    | 1.951                                | 0.81                                  | 0.55                                 |                         |         |
| 1120 | 6.77     | 516.3147 | 49.2054  | 1       | 2    | 2.348                                | 0.91                                  | 0.79                                 | Xanthosine              | HMDB    |
| 1357 | 6.98     | 365.1165 | 131.0582 | 1       | 1    | 2.386                                | 1.08                                  | 1.69                                 | Unknown                 |         |
| 1438 | 7.03     | 611.0893 | 754.0620 | 2       | 2    | 2.175                                | 0.69                                  | 0.41                                 |                         |         |
| 1472 | 7.06     | 591.3602 | 357.3019 | 1       | 1    | 2.080                                | 1.00                                  | 0.51                                 |                         |         |
| 1631 | 7.82     | 452.1842 | 218.1259 | 1       | 1    | 1.565                                | 0.86                                  | 0.54                                 | Threoninyl-Valine       | HMDB    |
| 1694 | 8.29     | 601.1473 | 367.0889 | 1       | 1    | 2.125                                | 0.52                                  | 0.51                                 |                         |         |
| 1733 | 8.34     | 659.1510 | 425.0927 | 1       | 1    | 2.188                                | 0.47                                  | 0.45                                 |                         |         |
| 1734 | 8.34     | 556.1243 | 322.0660 | 1       | 1    | 2.234                                | 0.49                                  | 0.46                                 |                         |         |
| 1735 | 8.34     | 584.1187 | 350.0604 | 1       | 1    | 2.199                                | 0.66                                  | 0.50                                 |                         |         |
| 1868 | 8.56     | 633.2566 | 798.3965 | 2       | 2    | 2.478                                | 0.96                                  | 0.77                                 |                         |         |
| 1939 | 8.94     | 407.5895 | 347.0624 | 2       | 2    | 1.939                                | 0.59                                  | 0.50                                 |                         |         |
| 2001 | 9.76     | 414.5979 | 361.0792 | 2       | 2    | 2.124                                | 2.16                                  | 2.33                                 |                         |         |
| 2025 | 9.97     | 315.1086 | 162.1006 | 2       | 2    | 2.499                                | 0.86                                  | 0.63                                 | Unknown                 |         |
| 2027 | 9.98     | 792.2656 | 325.1563 | 1       | 2    | 2.395                                | 1.00                                  | 0.66                                 |                         |         |
| 2029 | 9.99     | 396.1351 | 324.1536 | 2       | 2    | 2.516                                | 1.01                                  | 0.64                                 |                         |         |
| 2032 | 10.02    | 397.1348 | 326.1529 | 2       | 2    | 2.463                                | 1.03                                  | 0.68                                 |                         |         |
| 2096 | 10.56    | 697.3207 | 230.2114 | 1       | 2    | 2.330                                | 1.11                                  | 3.04                                 |                         |         |
| 2106 | 10.68    | 419.1107 | 370.1047 | 2       | 2    | 2.328                                | 1.14                                  | 2.26                                 |                         |         |
| 2108 | 10.68    | 420.1117 | 372.1067 | 2       | 2    | 2.432                                | 1.16                                  | 2.38                                 |                         |         |
| 2130 | 10.86    | 382.6482 | 297.1798 | 2       | 2    | 1.718                                | 1.27                                  | 2.81                                 |                         |         |
| 2145 | 11.00    | 418.5910 | 369.0653 | 2       | 2    | 1.742                                | 1.97                                  | 4.07                                 |                         |         |
| 2149 | 11.02    | 419.0931 | 185.0348 | 1       | 1    | 1.759                                | 1.88                                  | 3.98                                 |                         |         |
| 2153 | 11.03    | 419.5908 | 371.0650 | 2       | 2    | 1.791                                | 1.94                                  | 3.62                                 |                         |         |
| 2174 | 11.20    | 379.2159 | 145.1576 | 1       | 1    | 2.642                                | 2.04                                  | 3.08                                 | Spermidine              | Dns-lib |
| 2324 | 11.70    | 346.0868 | 112.0285 | 1       | 1    | 1.897                                | 1.88                                  | 2.91                                 | Uracil                  | Dns-lib |
| 2812 | 13.59    | 625.2693 | 158.1600 | 1       | 2    | 2.228                                | 3.14                                  | 3.81                                 |                         |         |
| 3103 | 15.96    | 370.0567 | 271.9967 | 2       | 2    | 2.638                                | 3.14                                  | 9.71                                 |                         |         |
| 3452 | 19.19    | 904.3773 | 437.2680 | 1       | 2    | 1.936                                | 0.73                                  | 2.56                                 |                         |         |
| 3488 | 19.45    | 359.1018 | 250.0870 | 2       | 2    | 2.364                                | 1.65                                  | 2.02                                 |                         |         |
| 3497 | 19.54    | 358.6008 | 249.0850 | 2       | 2    | 2.052                                | 1.32                                  | 2.06                                 |                         |         |
| 3706 | 22.46    | 357.4276 | 123.3693 | 1       | 1    | 2.442                                | 1.02                                  | 2.46                                 |                         |         |
| 3850 | 23.13    | 297.0848 | 126.0529 | 2       | 2    | 2.351                                | 1.46                                  | 1.65                                 |                         |         |
| 3852 | 23.13    | 301.0761 | 134.0355 | 2       | 2    | 2.037                                | 2.81                                  | 2.58                                 |                         |         |
| 4157 | 24.89    | 303.0776 | 138.0386 | 2       | 2    | 2.439                                | 1.46                                  | 1.77                                 |                         |         |
| 4384 | 26.02    | 370.0961 | 136.0378 | 1       | 1    | 2.414                                | 1.36                                  | 1.76                                 |                         |         |
| 4476 | 26.55    | 290.0715 | 112.0264 | 2       | 2    | 1.786                                | 1.44                                  | 3.08                                 |                         |         |
| 4487 | 26.58    | 294.5652 | 121.0138 | 2       | 2    | 2.334                                | 1.24                                  | 1.65                                 |                         |         |
| 4533 | 26.82    | 310.1231 | 76.0648  | 1       | 1    | 1.635                                | 0.60                                  | 0.43                                 |                         |         |
| 4550 | 26.88    | 738.2906 | 504.2322 | 1       | 1    | 1.895                                | 0.55                                  | 0.53                                 |                         |         |
| 4586 | 26.99    | 813.3229 | 579.2646 | 1       | 1    | 1.986                                | 0.52                                  | 0.54                                 |                         |         |
| 4672 | 27.30    | 755.3170 | 521.2586 | 1       | 1    | 2.022                                | 0.51                                  | 0.53                                 |                         |         |
| 4715 | 27.51    | 291.0831 | 57.0248  | 1       | 1    | 1.740                                | 0.82                                  | 0.27                                 |                         |         |
| 4748 | 27.60    | 375.4752 | 141.4169 | 1       | 1    | 2.061                                | N.A.                                  | 0.43                                 |                         |         |
| 4982 | 28.94    | 545.4018 | 78.2925  | 1       | 2    | 1.773                                | 0.44                                  | 0.50                                 |                         |         |
| 5039 | 29.12    | 280.8565 | 46.7982  | 1       | 1    | 2.091                                | 0.39                                  | 0.31                                 |                         |         |
| 5212 | 29.87    | 789.2996 | 555.2413 | 1       | 1    | 1.946                                | 0.60                                  | 0.55                                 |                         |         |

Supplemental Table T5. Classification results.

| ID | Validation dataset | Case#     | Date produced | Prediction results | Real classification result |
|----|--------------------|-----------|---------------|--------------------|----------------------------|
| 37 | VS_2               | CA5927-4  | Feb-14        | no                 | no                         |
| 38 | VS_2               | CA5927-7  | Feb-14        | yes                | yes                        |
| 39 | VS_2               | CA5938-6  | Feb-14        | no                 | no                         |
| 40 | VS_2               | CA5938-7  | Feb-14        | yes                | yes                        |
| 41 | VS_2               | CA5940-3  | Feb-14        | yes                | no                         |
| 42 | VS_2               | CA5940-12 | Feb-14        | yes                | yes                        |
| 43 | VS_2               | CA5962-6  | Apr-14        | yes                | yes                        |
| 44 | VS_2               | CA5962-8  | Apr-14        | no                 | no                         |
| 45 | VS_2               | CA5964-8  | Apr-14        | yes                | yes                        |
| 46 | VS_2               | CA5964-9  | Apr-14        | no                 | no                         |
| 47 | VS_2               | CA5965-2  | Apr-14        | no                 | no                         |
| 48 | VS_2               | CA5965-8  | Apr-14        | yes                | yes                        |
| 49 | VS_2               | CA6032-10 | Jul-14        | yes                | yes                        |
| 50 | VS_2               | CA6035-8  | Jul-14        | yes                | yes                        |
| 51 | VS_2               | CA6035-11 | Jul-14        | no                 | no                         |
| 52 | VS_2               | CA6032-11 | Jul-14        | no                 | no                         |
| 53 | VS_2               | CA6037-7  | Jul-14        | no                 | no                         |
| 54 | VS_2               | CA6037-10 | Jul-14        | no                 | yes                        |
| 55 | VS_2               | CA6038-9  | Jul-14        | yes                | yes                        |
| 56 | VS_2               | CA6038-10 | Jul-14        | yes                | no                         |
| 57 | VS_2               | CA6046-4  | Jul-14        | yes                | yes                        |
| 58 | VS_2               | CA6046-12 | Jul-14        | no                 | no                         |
| 59 | VS_2               | CA6049-8  | Jul-14        | yes                | yes                        |
| 60 | VS_2               | CA6049-10 | Jul-14        | no                 | no                         |

|  |                         |
|--|-------------------------|
|  | Not correctly predicted |
|--|-------------------------|

Supplemental Table T6. List of metabolites used for group classification.

|   | ID   | Name                                | rt    | mz_light | Monoisotopic<br>molecular<br>mass | intensity | fold change<br>(tumor vs.<br>negative) | p value | AUC   |
|---|------|-------------------------------------|-------|----------|-----------------------------------|-----------|----------------------------------------|---------|-------|
| 1 | 28   | Adenosine monophosphate             | 2.05  | 581.1207 | 347.0623                          | 1.9E+04   | 0.53                                   | 4.6E-03 | 0.821 |
| 2 | 1357 | Unknown ID1357*                     | 6.98  | 365.1165 | 131.0582                          | 1.3E+04   | 1.55                                   | 1.8E-03 | 0.881 |
| 3 | 2025 | Unknown ID2025**                    | 9.97  | 315.1086 | 162.1006                          | 9.9E+03   | 0.68                                   | 3.5E-04 | 0.878 |
| 4 | 2174 | Spermidine                          | 11.20 | 379.2159 | 145.1576                          | 1.6E+04   | 2.91                                   | 8.5E-03 | 0.849 |
| 5 | 2324 | Uracil                              | 11.70 | 346.0868 | 112.0285                          | 8.1E+05   | 2.67                                   | 8.0E-03 | 0.913 |
| 6 | 2106 | Ophthalmic acid +HPO3***            | 10.68 | 419.1107 | 370.1047                          | 1.5E+04   | 2.00                                   | 3.1E-03 | 0.821 |
| 7 | 2149 | 2,3-Diaminopropionic acid +HPO3**** | 11.02 | 419.0931 | 185.0348                          | 4.1E+04   | 3.50                                   | 1.7E-02 | 0.827 |

\*confirmed to be not 4-hydroxyproline.

\*\*confirmed to be not 5-hydroxylysine.

\*\*\*based on mass match alone, it was proposed to be a phospholyated form of ophthalmic acid.

\*\*\*\*based on mass match alone, it was proposed to be a phospholyated form of 2,3-diaminopropionic acid.
